# Supplementary material for: Design, synthesis, and evaluation of 1,4-naphthoquinone-chromene hybrids as potential anti-K562 and A549 agents
Source: Royal Society of Chemistry journal article supplement (doi:10.1039/d3nj05743g), 2024-01-01

## Design, synthesis, and evaluation of 1,4-naphthoquinone-chromene hybrids as potential anti-K562 and A549 agents

Wen-Hui Zhang<sup>a</sup>, Bo Zhang<sup>b</sup>, Bo-Wen Pan<sup>a</sup>, Xiong-Wei Liu<sup>a</sup>, Zhi-Gang Yin<sup>c,\*</sup>, Yu-Zhou Zhuo<sup>a</sup>,  
Chuan-wen Lei<sup>a</sup>, Ying Zhou<sup>a,\*</sup>

<sup>a</sup> College of Pharmaceutical Sciences, Guizhou University of Traditional Chinese Medicine, Guiyang, 550025

<sup>b</sup> College of Orthopaedics and Traumatology, Guizhou University of Traditional Chinese Medicine, Guiyang 550025

<sup>c</sup> School of Basic Medical Sciences, Xiang Nan University, Chenzhou 423000, China

## Supporting Information

### Table of Contents

|                                                                                                  |    |
|--------------------------------------------------------------------------------------------------|----|
| 1. X-Ray crystal data for compound <b>4am</b> .....                                              | S1 |
| 2. The copies of <sup>1</sup> H NMR and <sup>13</sup> C NMR spectra for compounds <b>4</b> ..... | S3 |

## 1. X-Ray crystal data for compound 4am

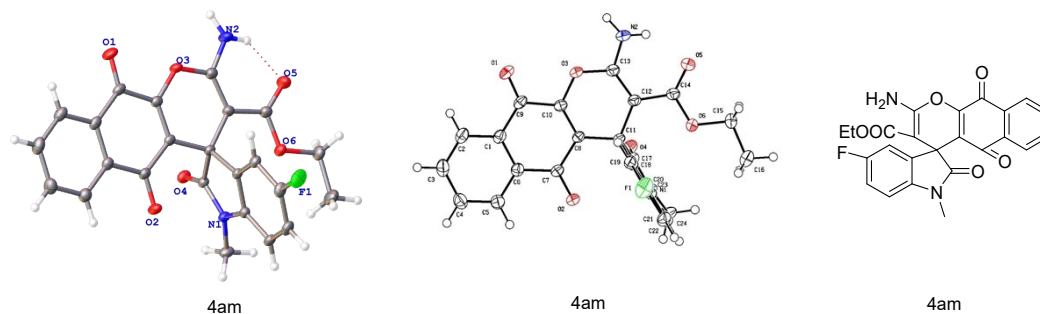

**Table 1 Crystal data and structure refinement for 4am**

|                                                      |                                                                |
|------------------------------------------------------|----------------------------------------------------------------|
| Identification code                                  | yes-21                                                         |
| Empirical formula                                    | C <sub>24</sub> H <sub>17</sub> FN <sub>2</sub> O <sub>6</sub> |
| Formula weight                                       | 448.39                                                         |
| Temperature/K                                        | 149.99(10)                                                     |
| Crystal system                                       | triclinic                                                      |
| Space group                                          | P-1                                                            |
| <i>a</i> /Å                                          | 8.7150(8)                                                      |
| <i>b</i> /Å                                          | 10.4907(8)                                                     |
| <i>c</i> /Å                                          | 12.3492(6)                                                     |
| α/°                                                  | 92.135(5)                                                      |
| β/°                                                  | 101.797(6)                                                     |
| γ/°                                                  | 108.263(7)                                                     |
| Volume/Å <sup>3</sup>                                | 1043.27(14)                                                    |
| <i>Z</i>                                             | 2                                                              |
| ρ <sub>calc</sub> /cm <sup>3</sup>                   | 1.427                                                          |
| μ/mm <sup>-1</sup>                                   | 0.927                                                          |
| <i>F</i> (000)                                       | 464.0                                                          |
| Crystal size/mm <sup>3</sup>                         | 0.16 × 0.13 × 0.11                                             |
| Radiation                                            | Cu Kα (λ = 1.54184)                                            |
| 2θ range for data collection/°                       | 7.356 to 147.674                                               |
| Index ranges                                         | -10 ≤ <i>h</i> ≤ 9, -10 ≤ <i>k</i> ≤ 13, -15 ≤ <i>l</i> ≤ 15   |
| Reflections collected                                | 6860                                                           |
| Independent reflections                              | 4079 [R <sub>int</sub> = 0.0186, R <sub>sigma</sub> = 0.0232]  |
| Data/restraints/parameters                           | 4079/0/305                                                     |
| Goodness-of-fit on <i>F</i> <sup>2</sup>             | 1.013                                                          |
| Final <i>R</i> indexes [ <i>I</i> > 2σ ( <i>I</i> )] | R <sub>1</sub> = 0.0400, wR <sub>2</sub> = 0.1075              |
| Final <i>R</i> indexes [all data]                    | R <sub>1</sub> = 0.0422, wR <sub>2</sub> = 0.1098              |
| Largest diff. peak/hole / e Å <sup>-3</sup>          | 0.22/-0.27                                                     |

### Crystal structure determination of 4am

**Crystal Data** for  $C_{24}H_{17}FN_2O_6$  ( $M=448.39$  g/mol): triclinic, space group P-1 (no. 2),  $a = 8.7150(8)$  Å,  $b = 10.4907(8)$  Å,  $c = 12.3492(6)$  Å,  $\alpha = 92.135(5)^\circ$ ,  $\beta = 101.797(6)^\circ$ ,  $\gamma = 108.263(7)^\circ$ ,  $V = 1043.27(14)$  Å<sup>3</sup>,  $Z = 2$ ,  $T = 149.99(10)$  K,  $\mu(\text{Cu K}\alpha) = 0.927$  mm<sup>-1</sup>,  $D_{\text{calc}} = 1.427$  g/cm<sup>3</sup>, 6860 reflections measured ( $7.356^\circ \leq 2\Theta \leq 147.674^\circ$ ), 4079 unique ( $R_{\text{int}} = 0.0186$ ,  $R_{\text{sigma}} = 0.0232$ ) which were used in all calculations. The final  $R_1$  was 0.0400 ( $I > 2\sigma(I)$ ) and  $wR_2$  was 0.1098 (all data).

## 2. The copies of $^1\text{H}$ NMR and $^{13}\text{C}$ NMR spectra for compounds 4

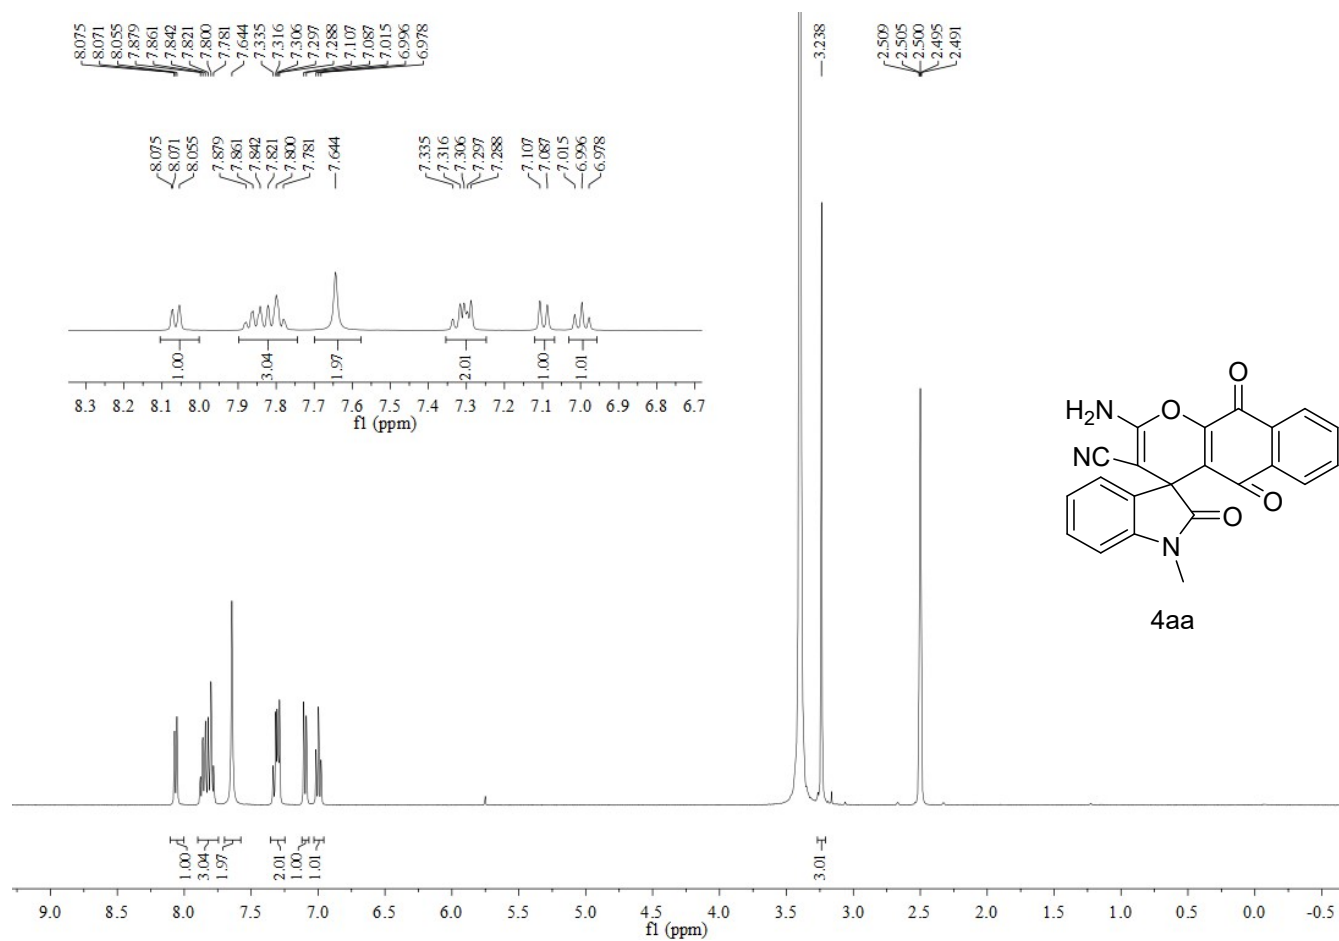

$^1\text{H}$  NMR of Compound **4aa** (400 MHz,  $\text{DMSO-}d_6$ )

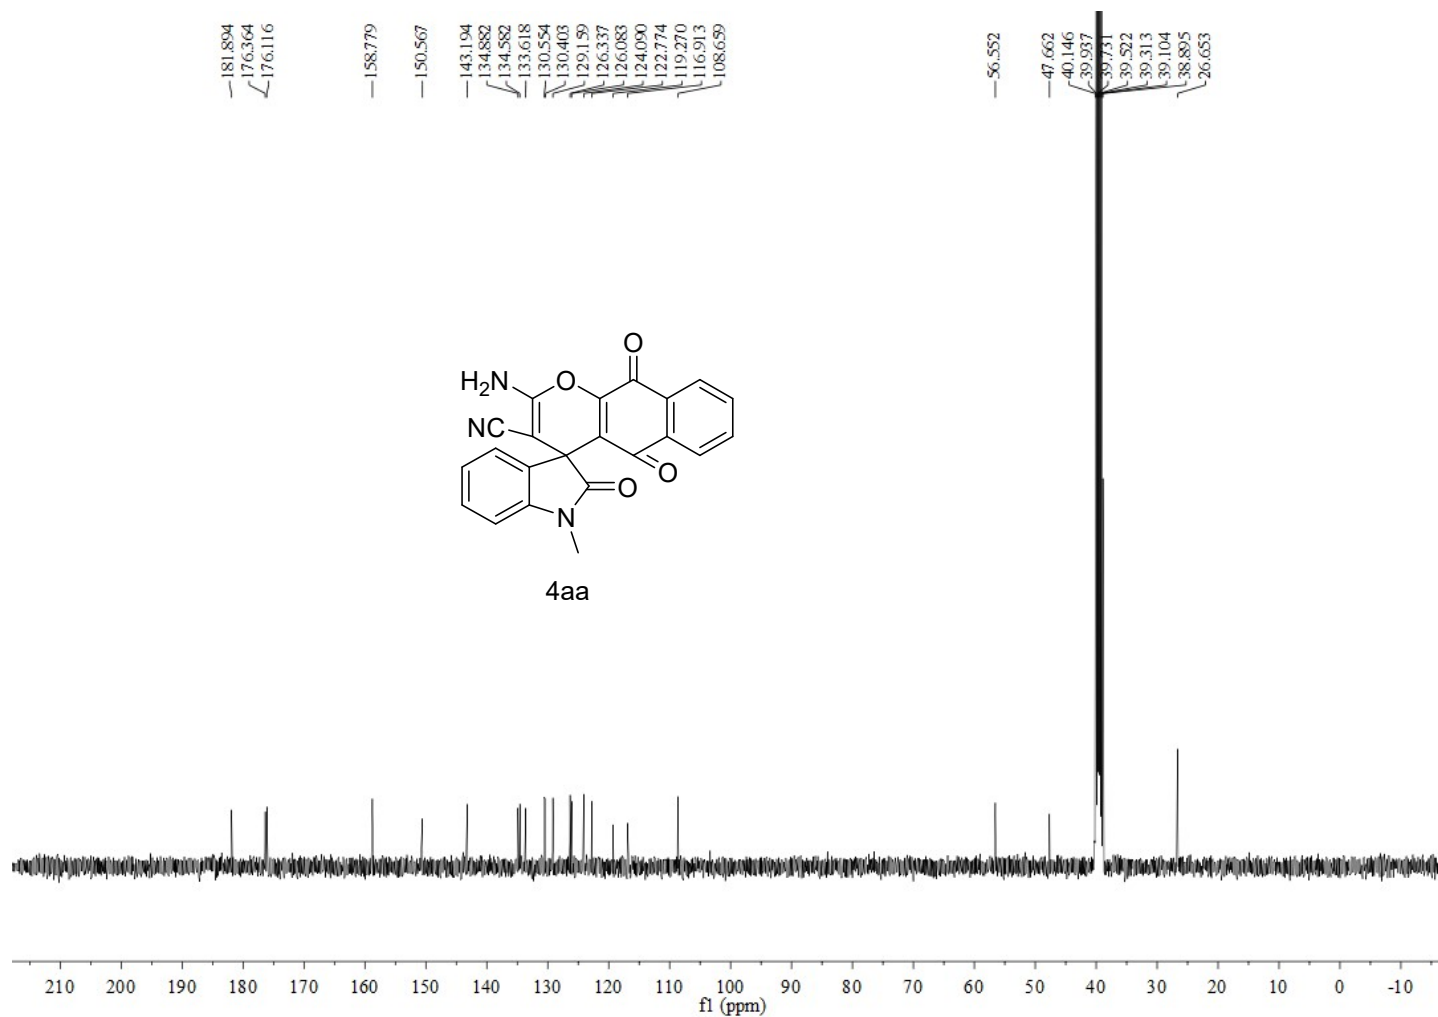

<sup>13</sup>C NMR of Compound **4aa** (101 MHz, DMSO-*d*<sub>6</sub>)

Item name: Yes-1  
Item description:

Channel name: 1: Average Time 0.1420 min : TOF MS (50-1500) ESI+ : Centroided : Combined

5.77e6

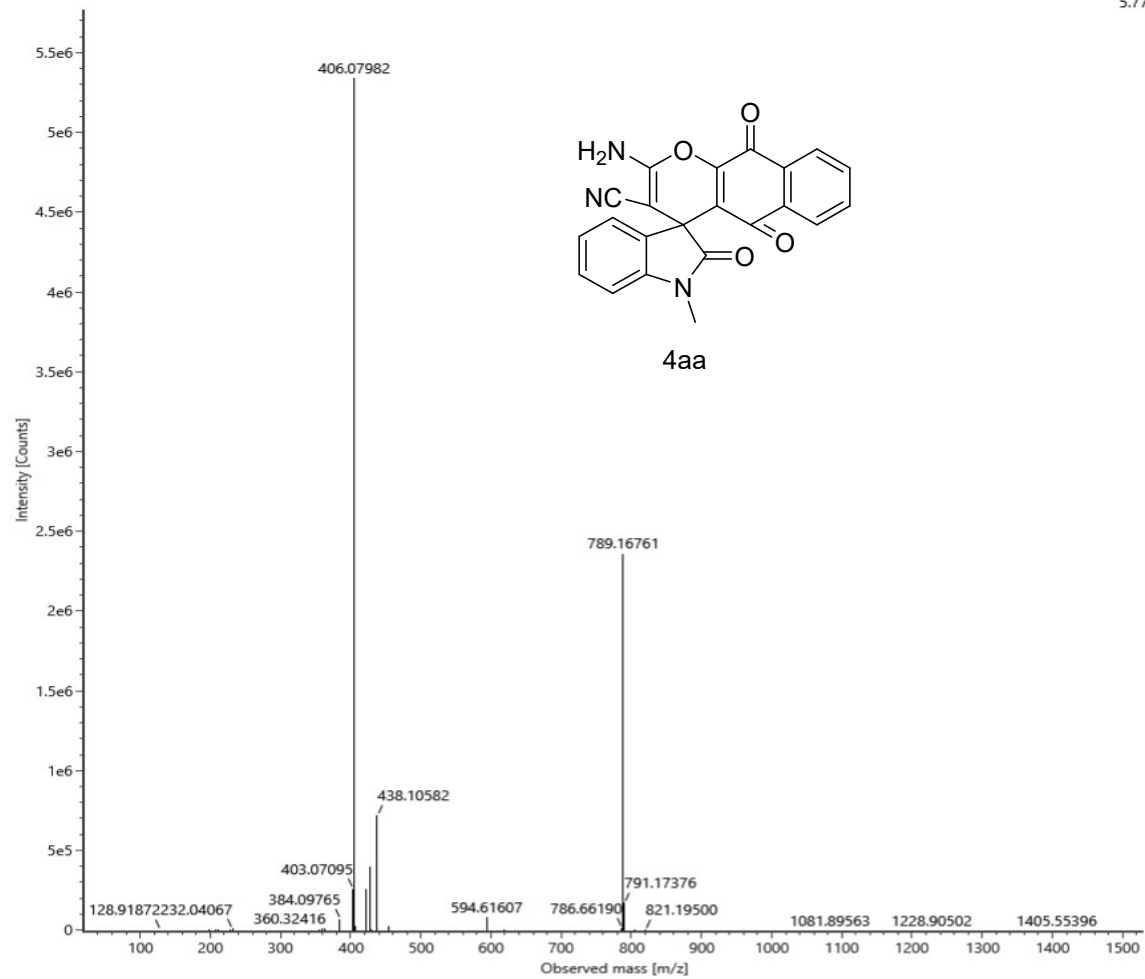

HRMS of Compound 4aa

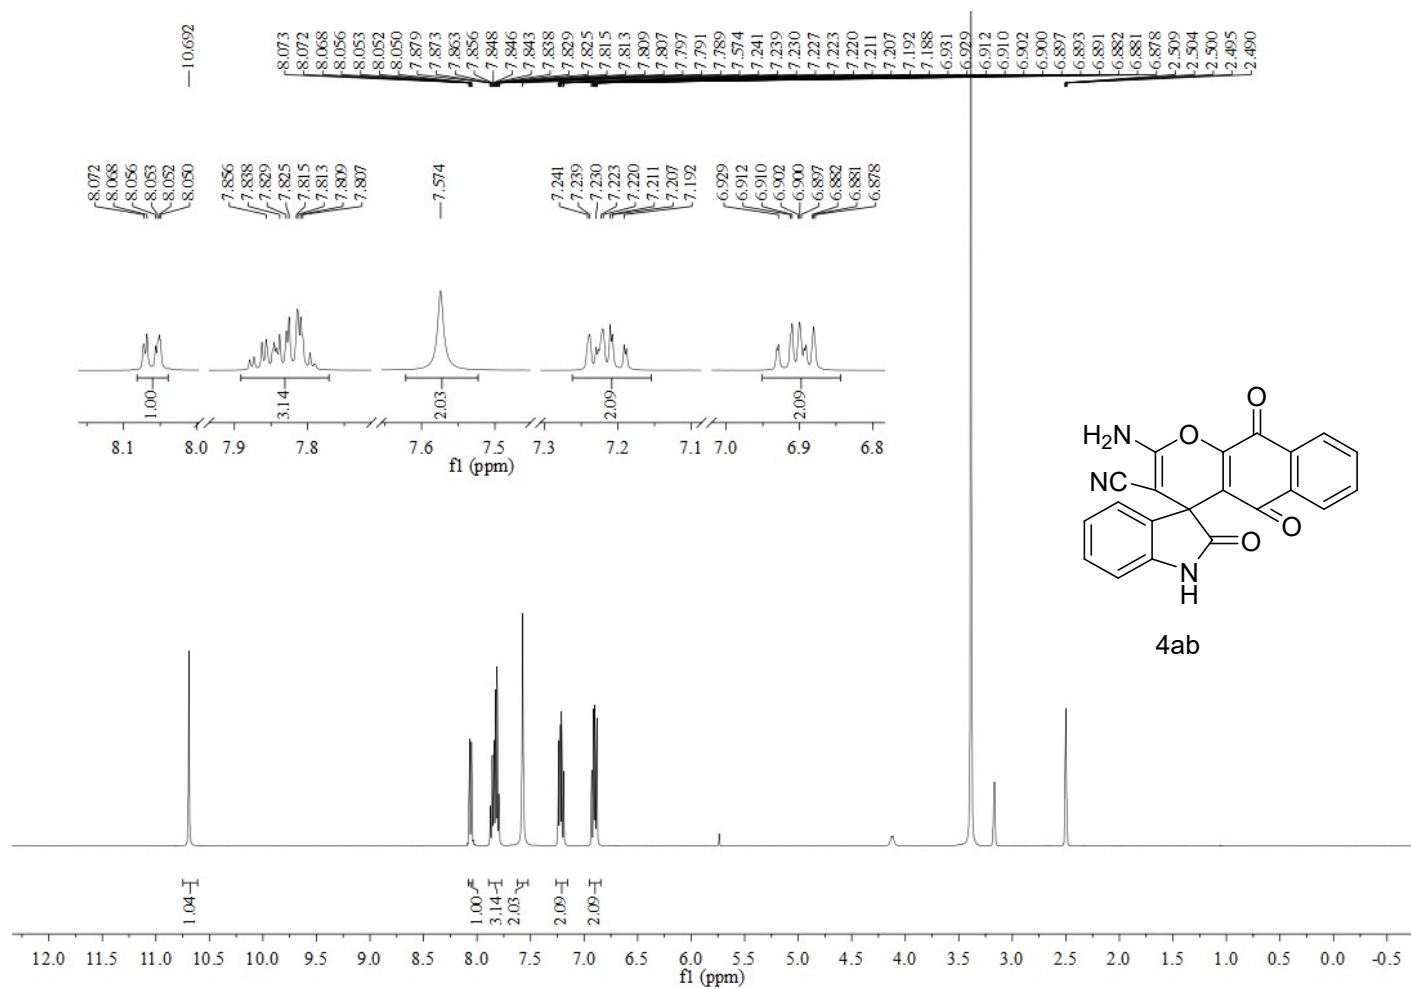

$^1\text{H NMR}$  of Compound **4ab** (400 MHz,  $\text{DMSO-}d_6$ )

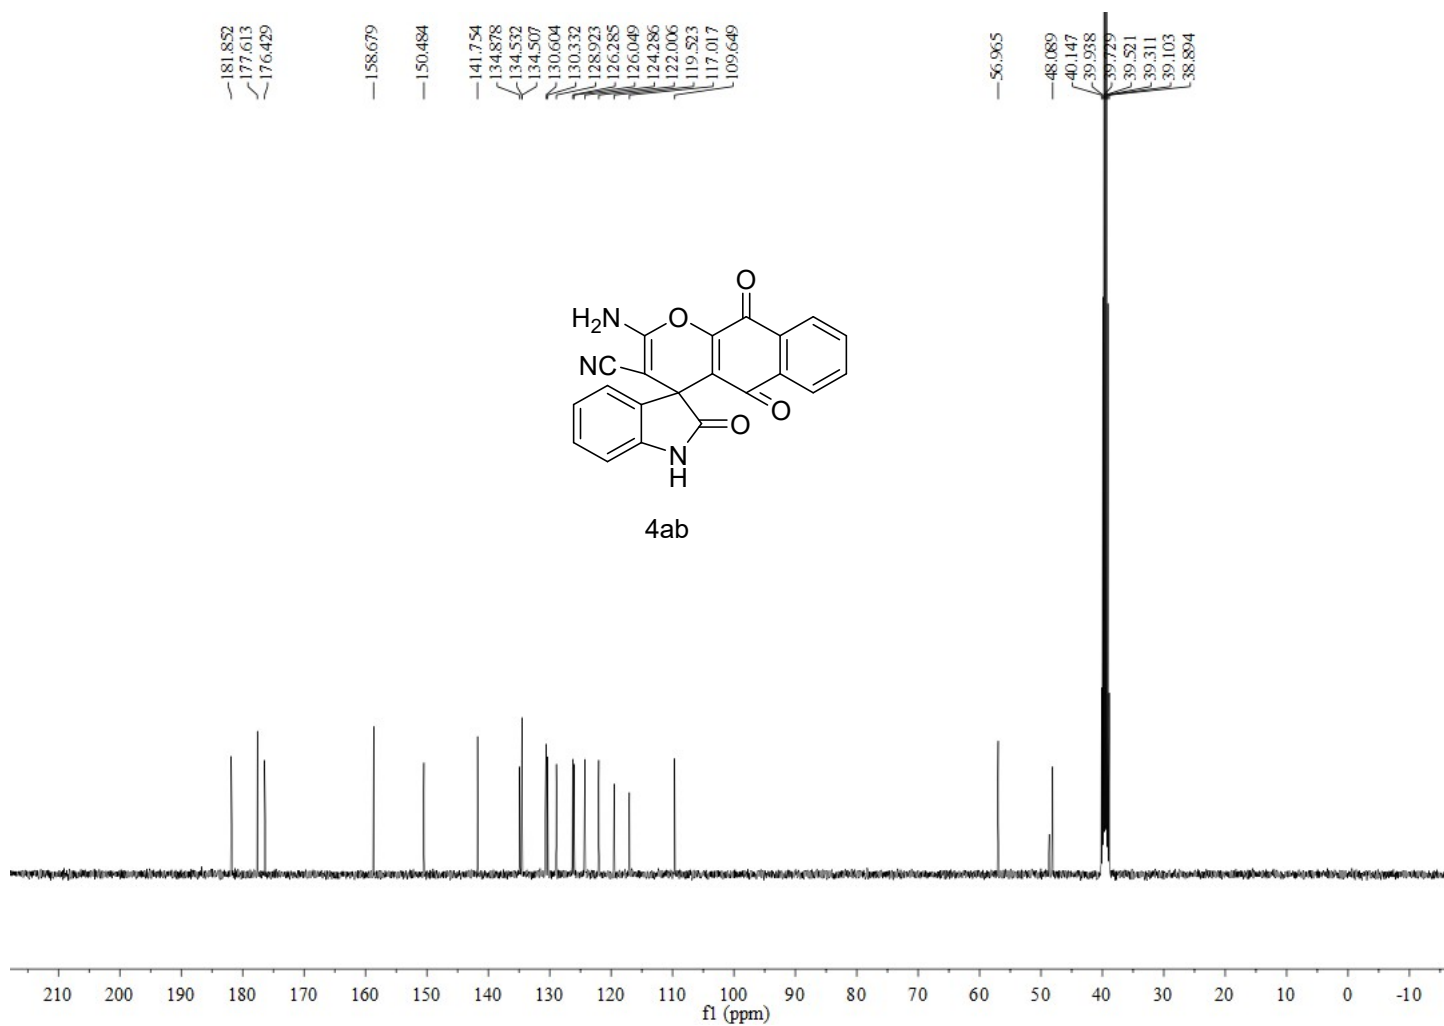

<sup>13</sup>C NMR of Compound **4ab** (101 MHz, DMSO-*d*<sub>6</sub>)



Item name: Yes-2  
Item description:

Channel name: 1: Average Time 0.1174 min : TOF MS (50-1500) ESI+ : Centroided : Combined

4.24e6

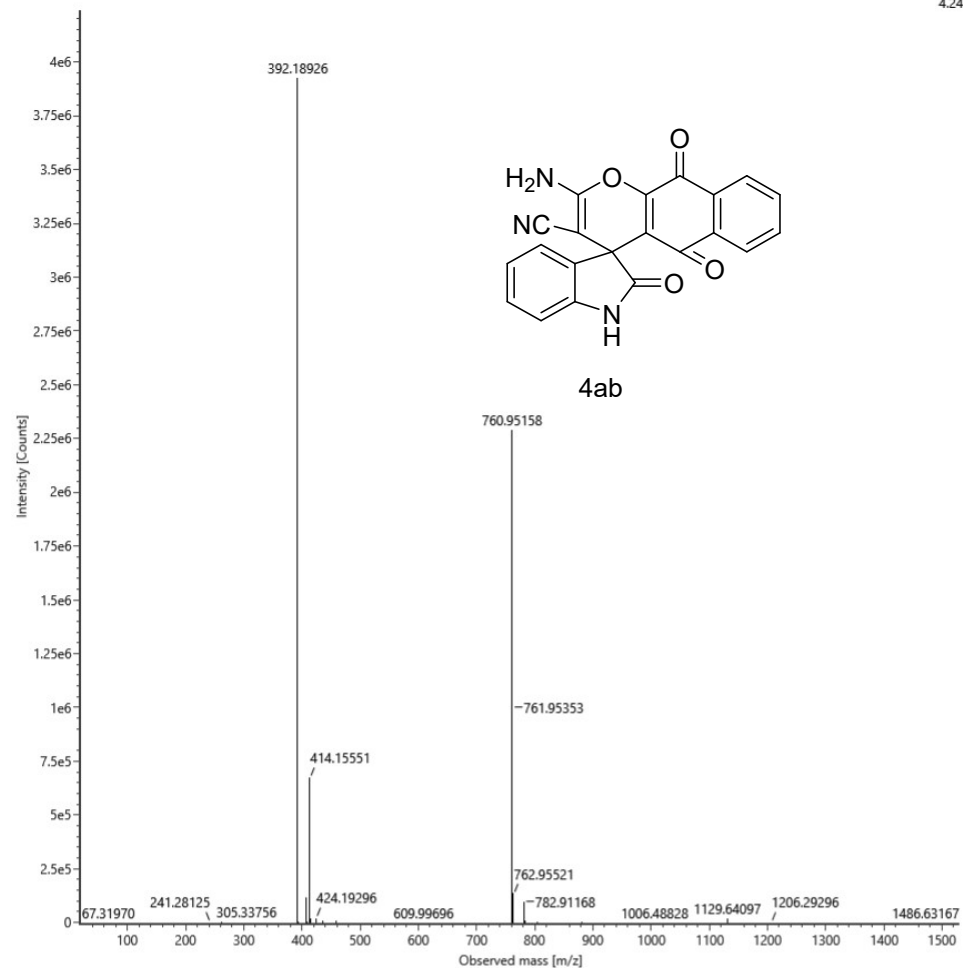

HRMS of Compound 4ab

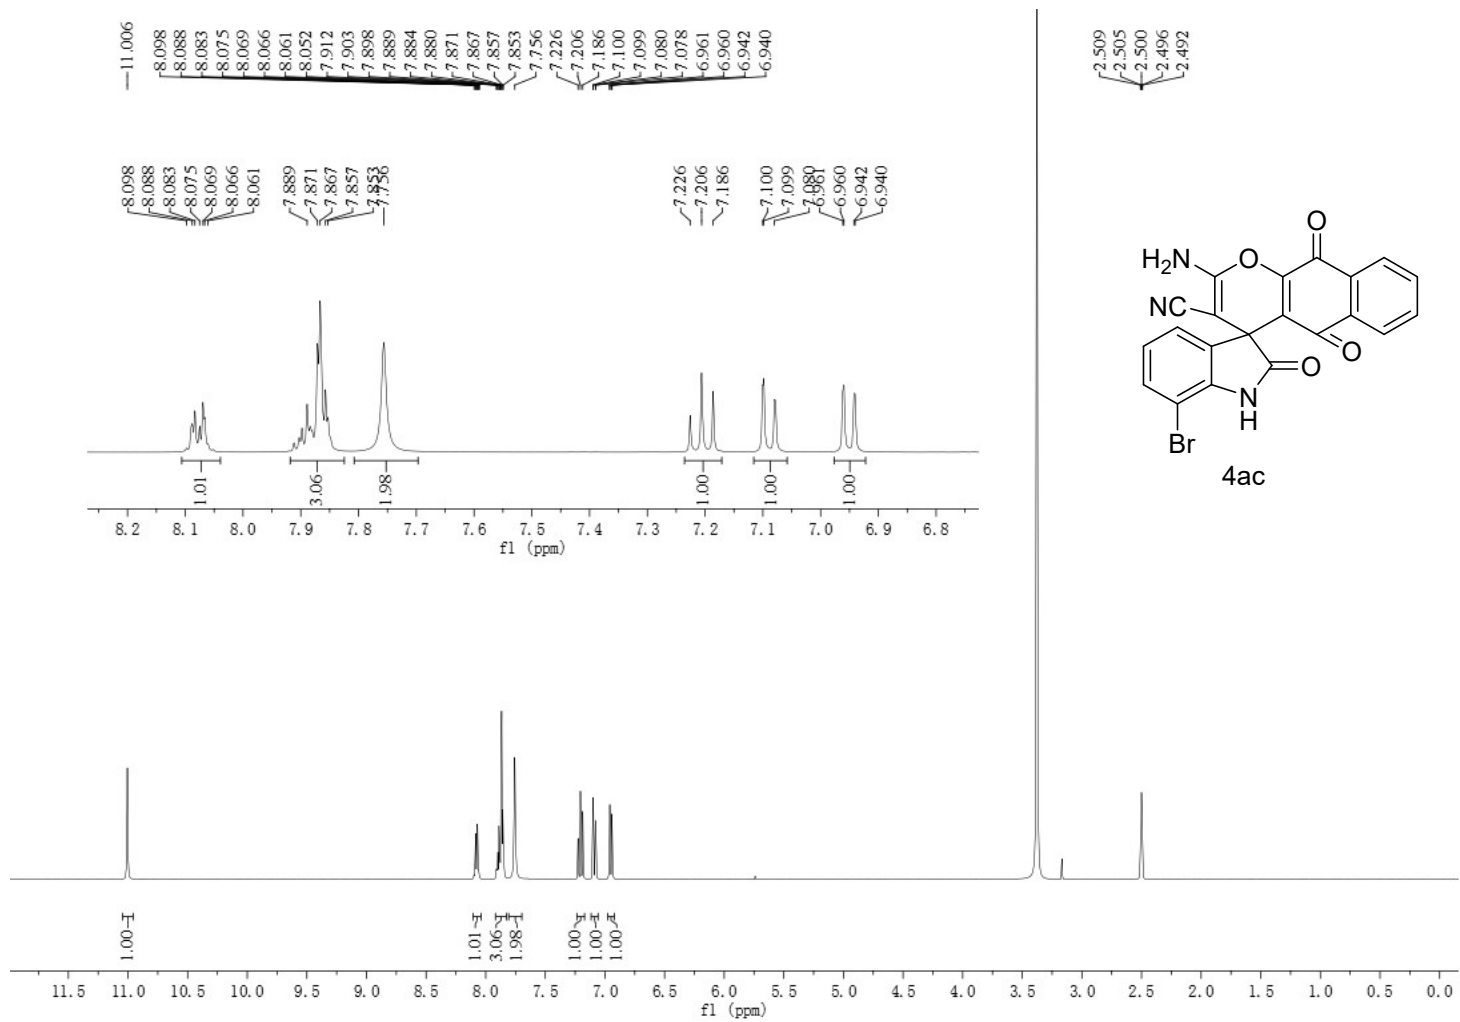

<sup>1</sup>H NMR of Compound 4ac (400 MHz, DMSO-*d*<sub>6</sub>)

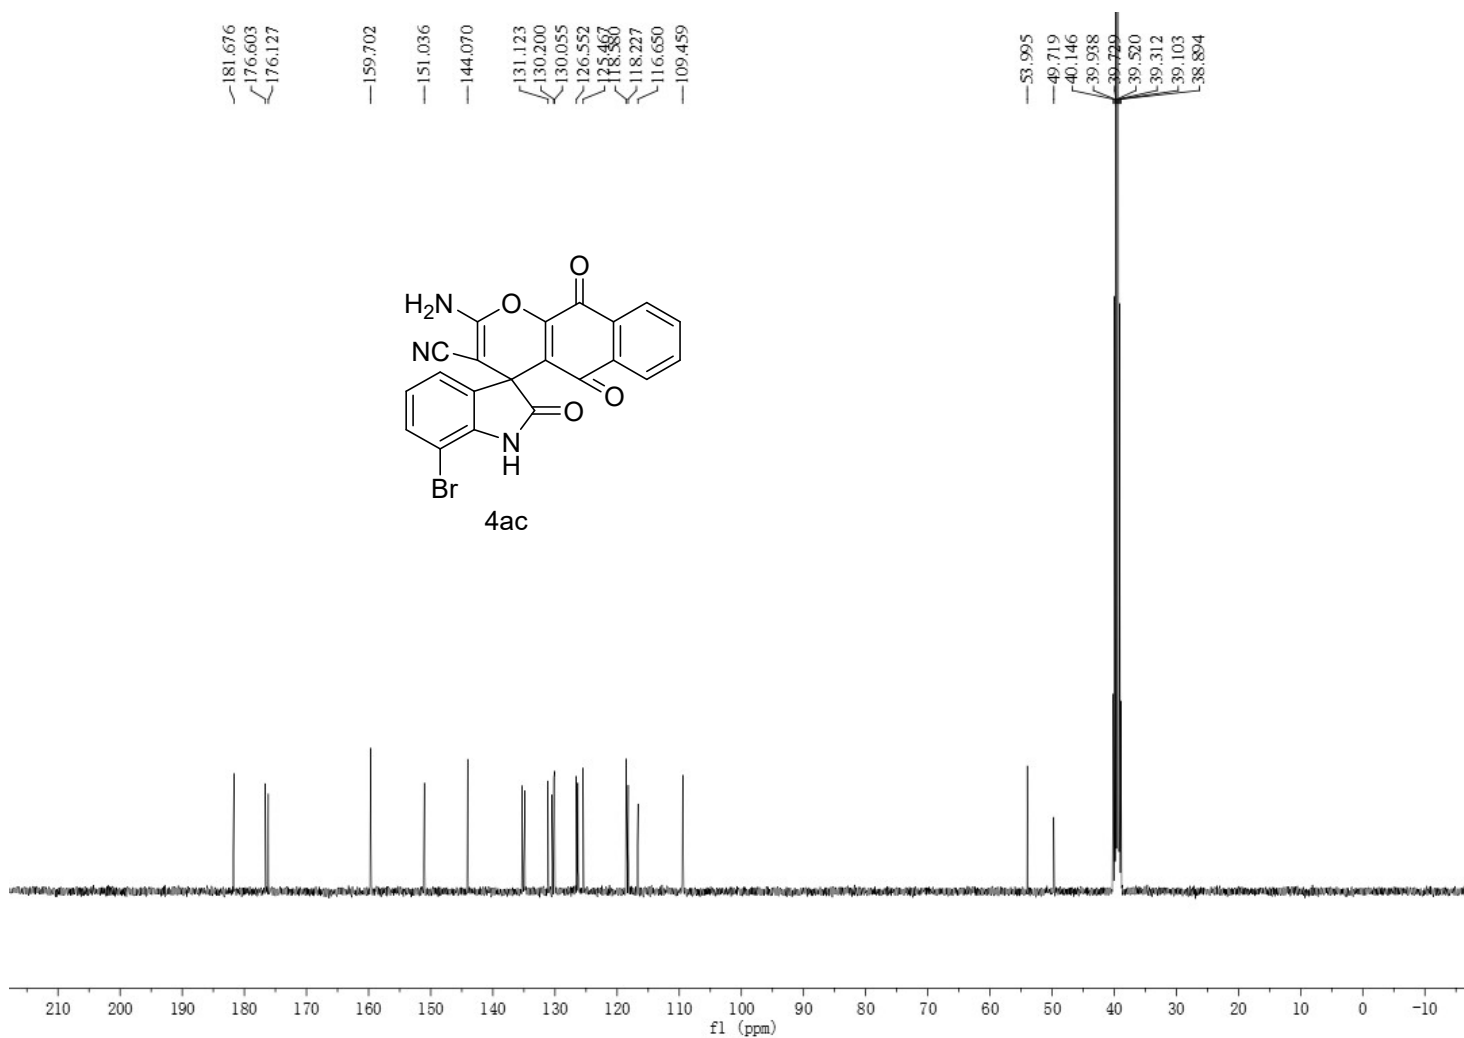

<sup>13</sup>C NMR of Compound **4ac** (101 MHz, DMSO-*d*<sub>6</sub>)

Item name: Yes-3  
Item description:

Channel name: 1: Average Time 0.1420 min : TOF MS (50-1500) ESI+ : Centroided : Combined

1.57e6

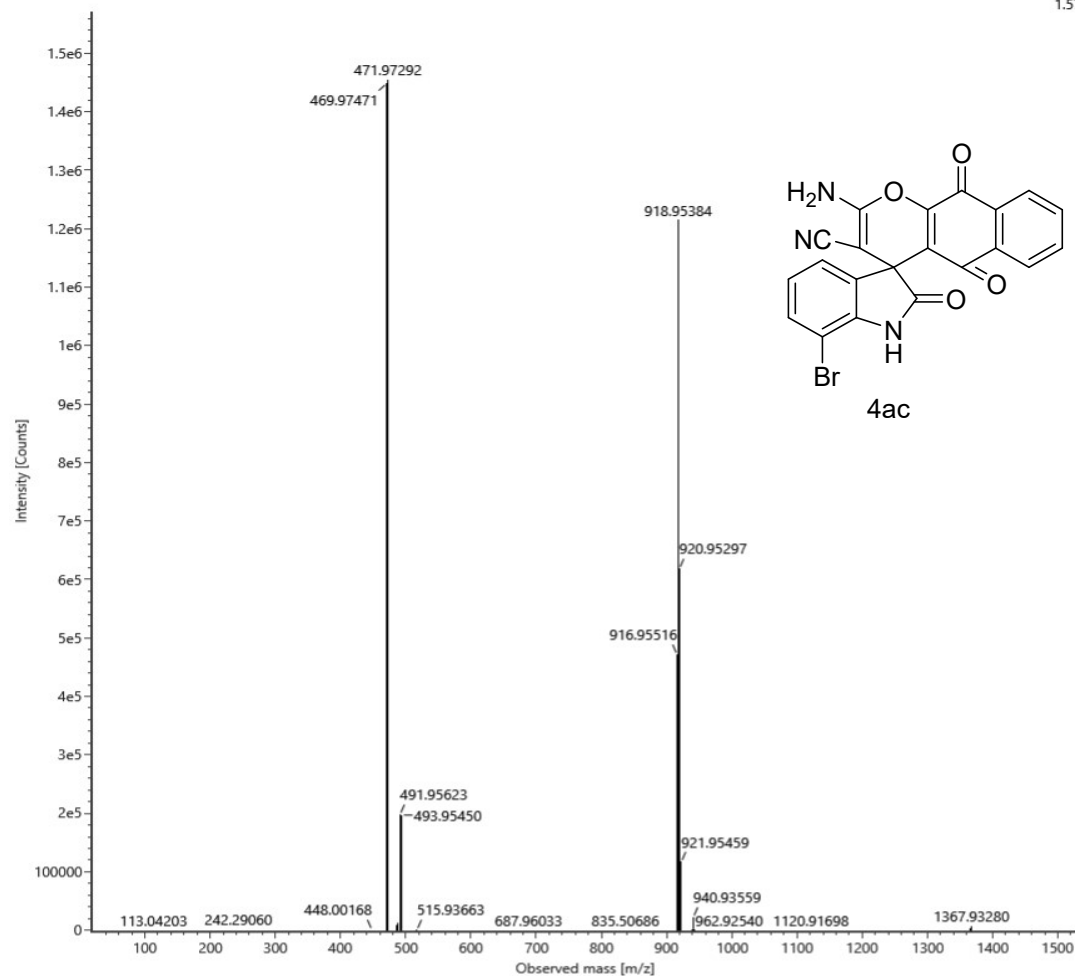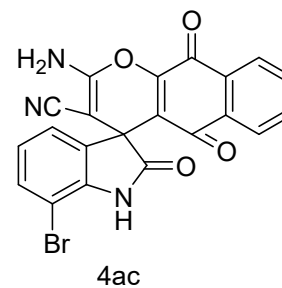

HRMS of Compound 4ac

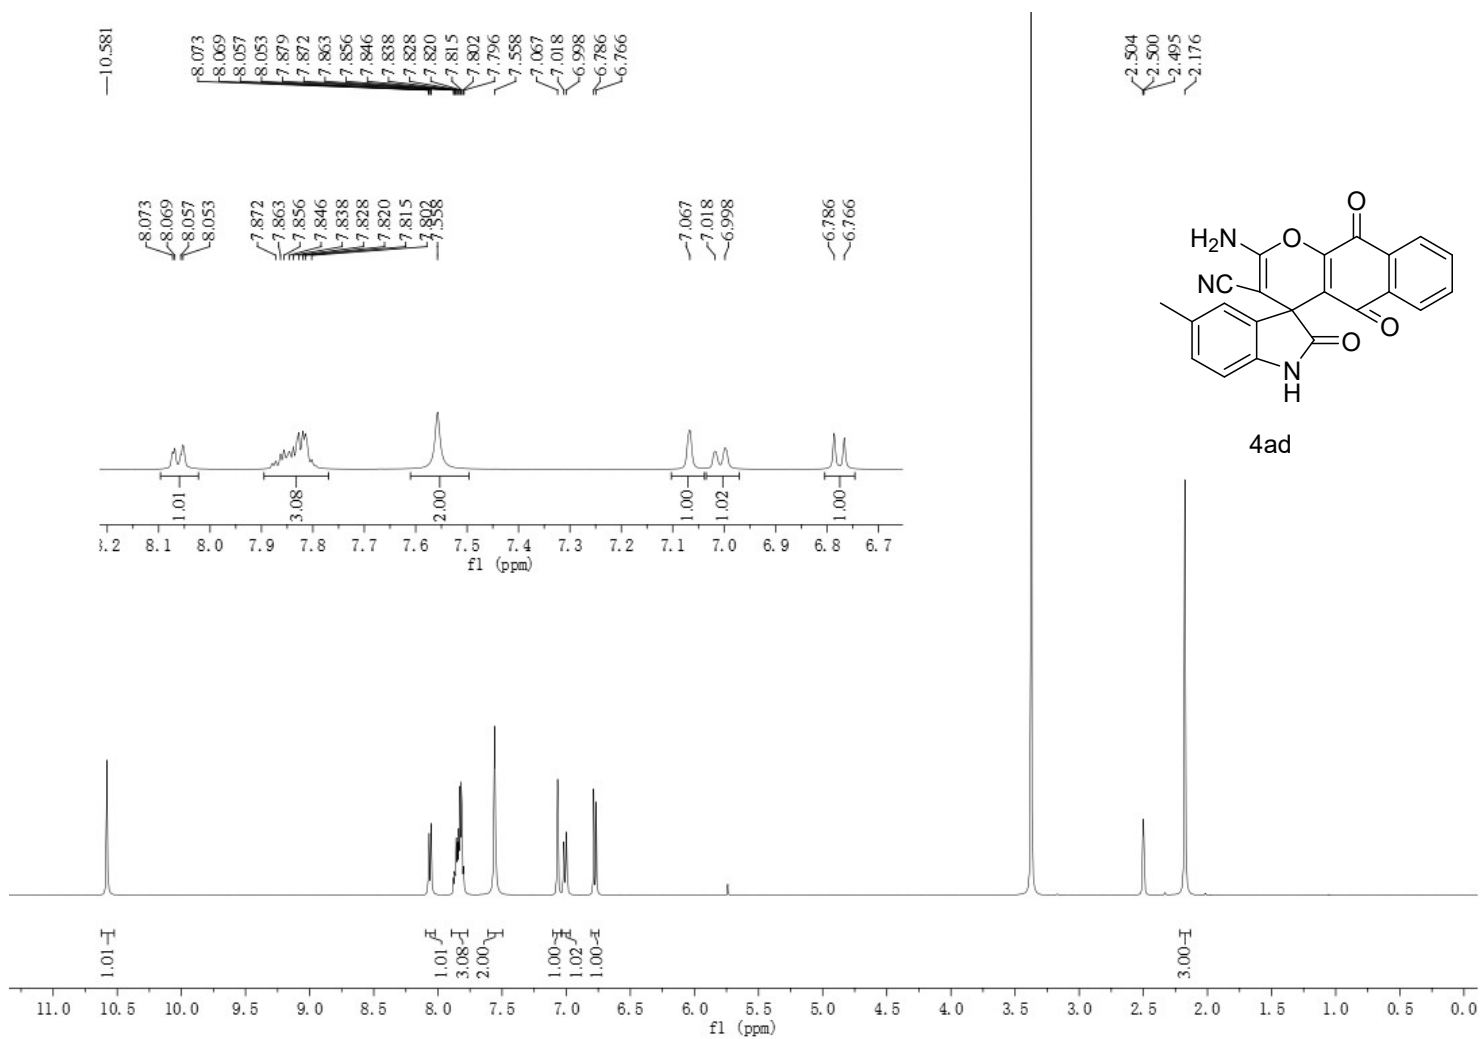

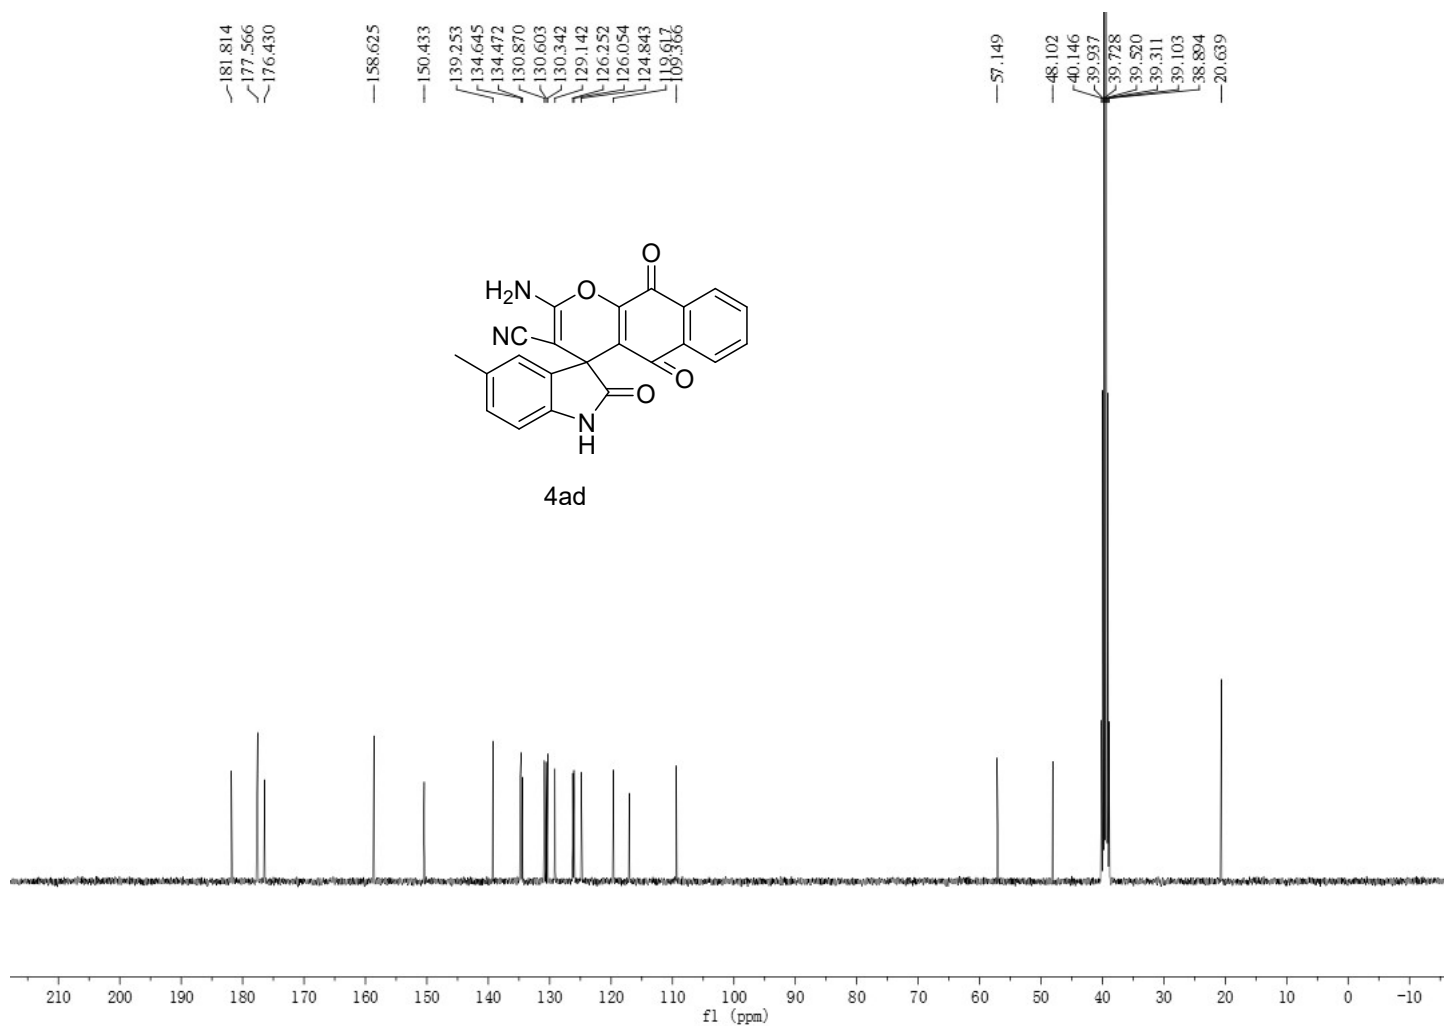

<sup>13</sup>C NMR of Compound **4ad** (101 MHz, DMSO-*d*<sub>6</sub>)

Item name: Yes-6  
Item description:

Channel name: 1: Average Time 0.1046 min : TOF MS (50-1500) ESI+ : Centroided : Combined

2.56e7

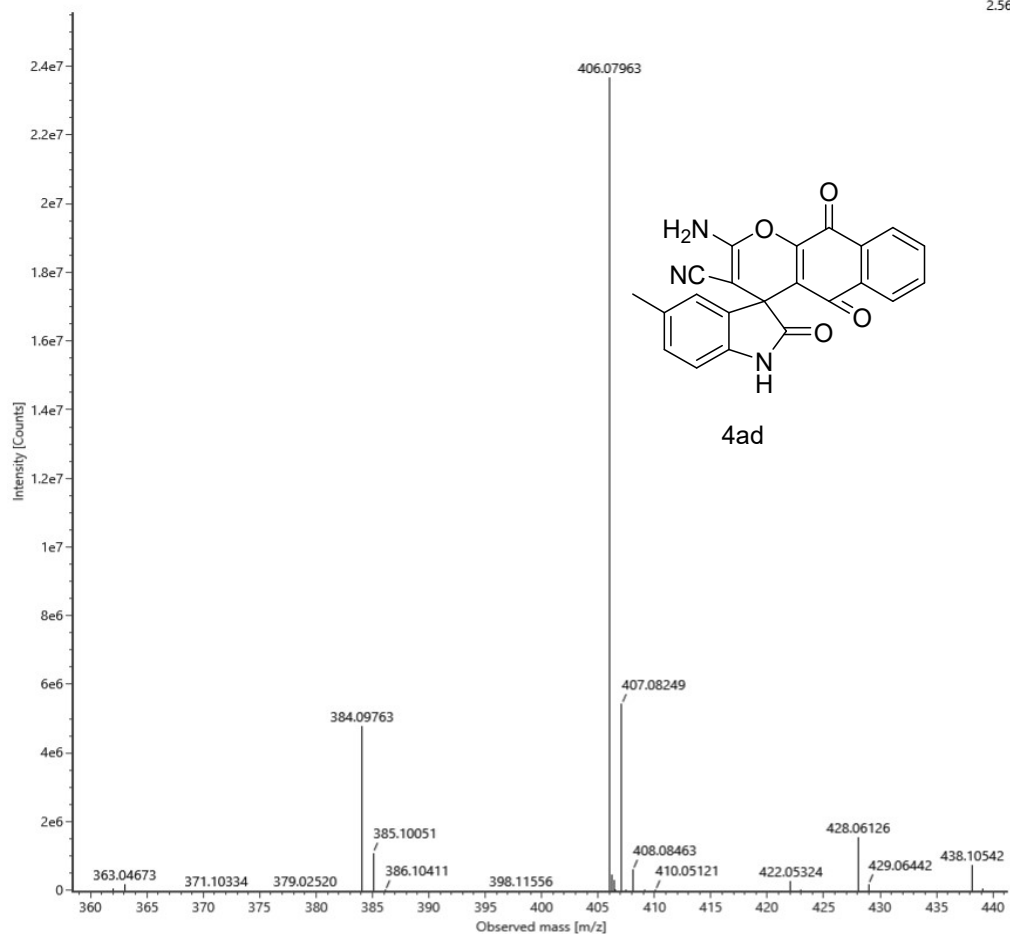

HRMS of Compound **4ad**

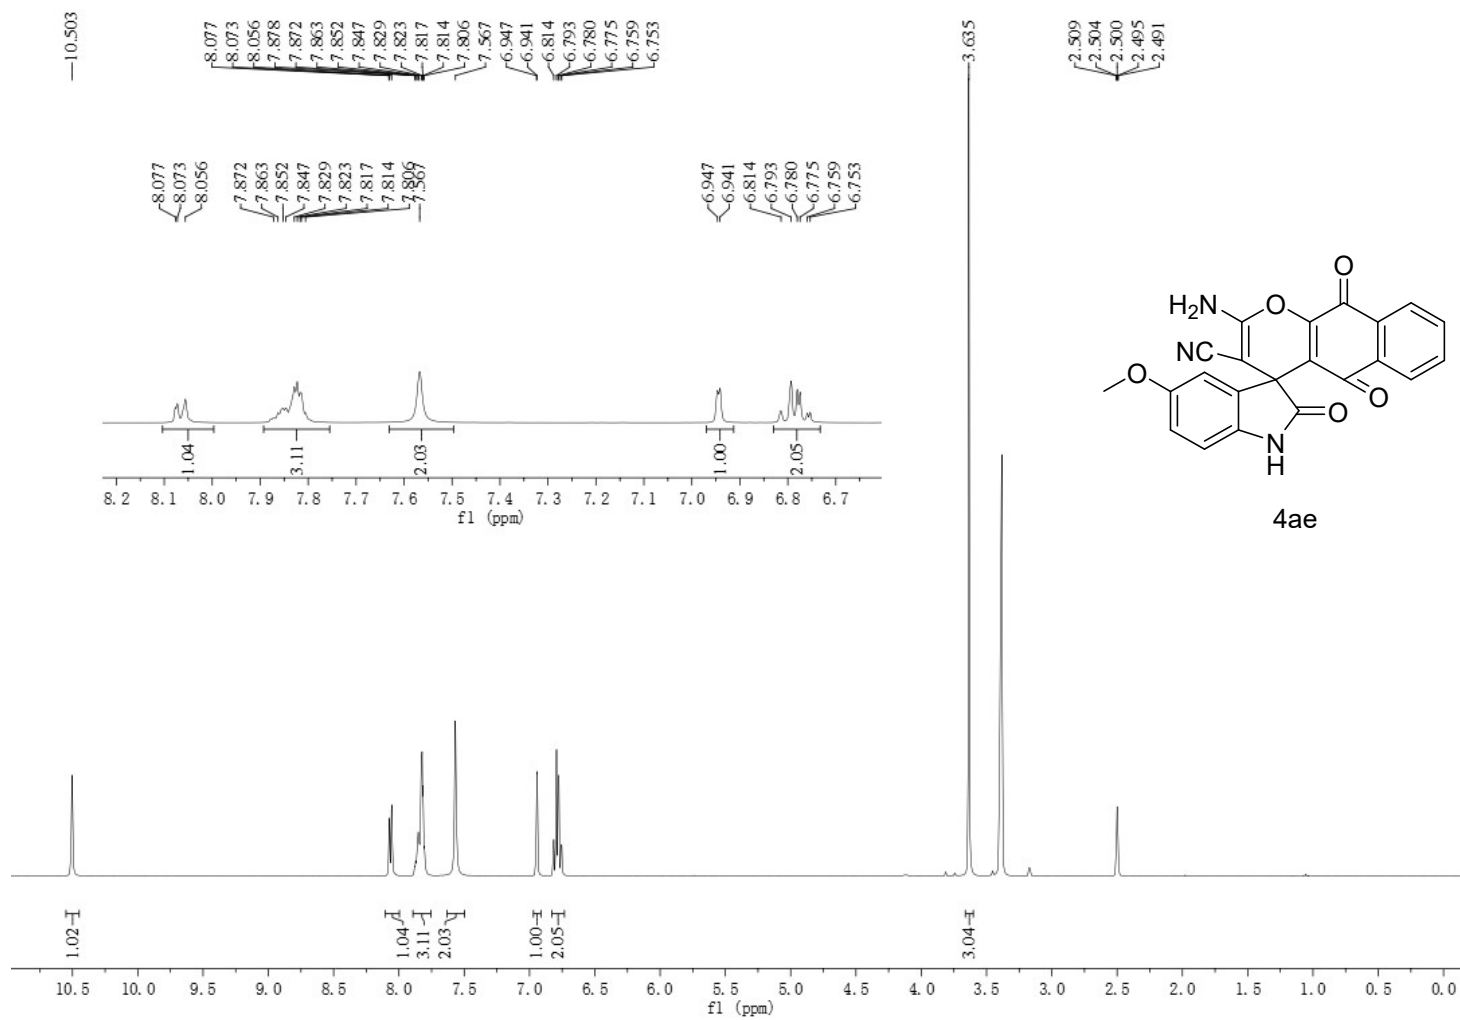

<sup>1</sup>H NMR of Compound **4ae** (400 MHz, DMSO-*d*<sub>6</sub>)



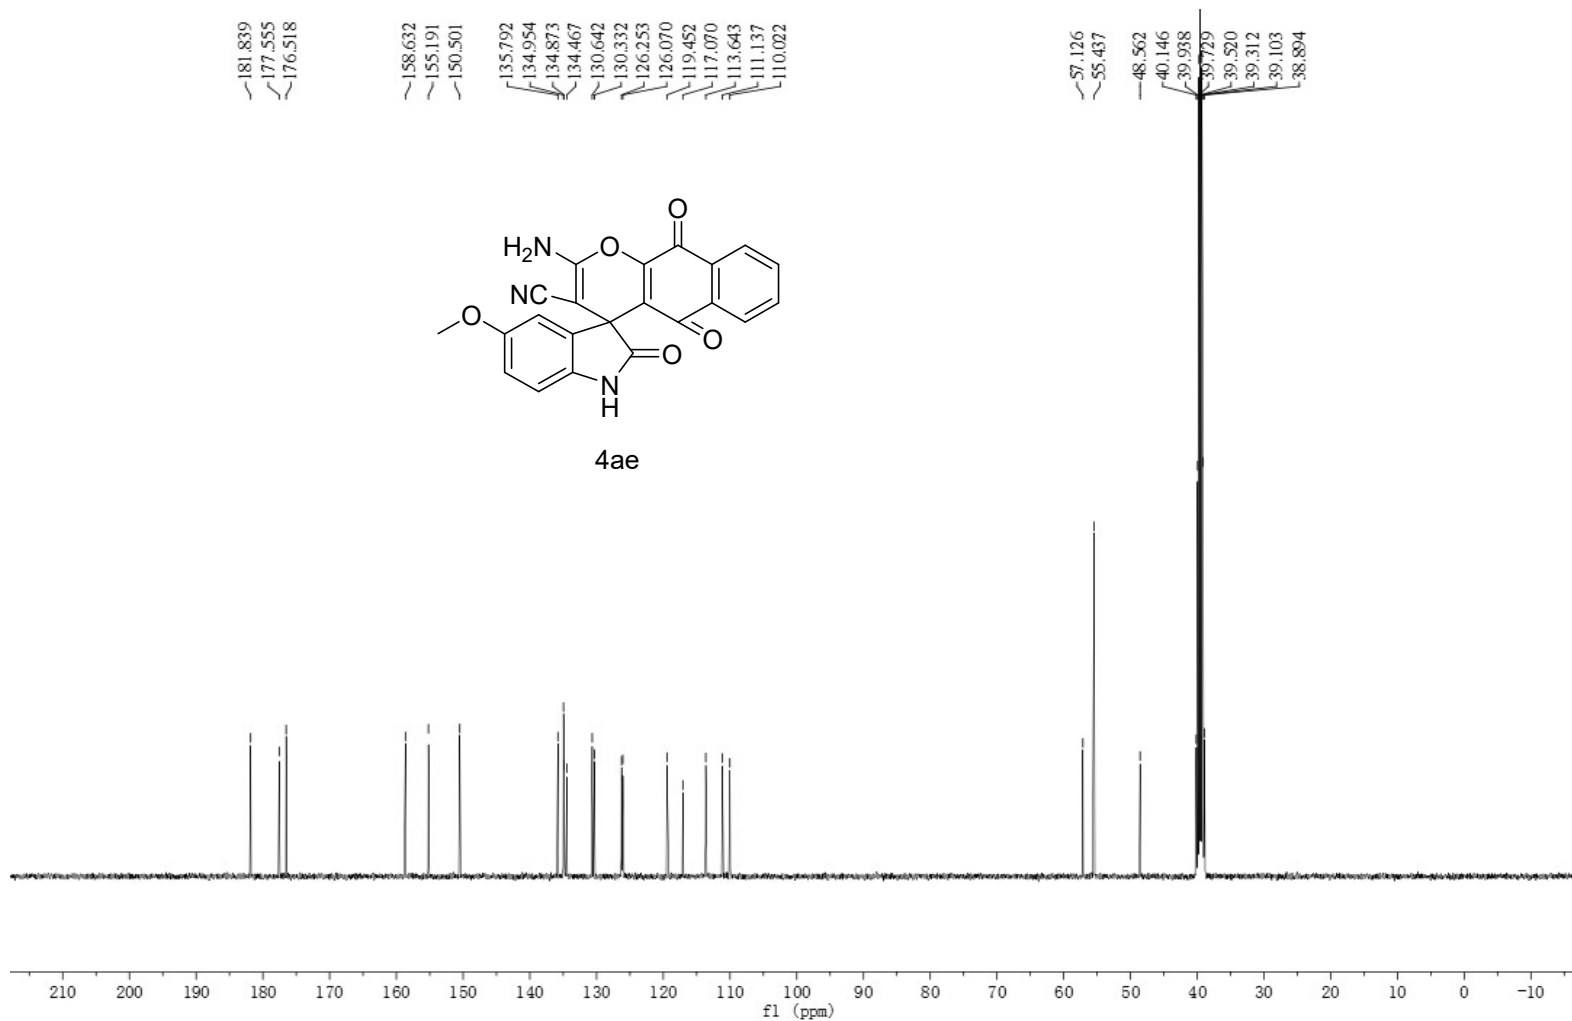

<sup>13</sup>C NMR of Compound **4ae** (101 MHz, DMSO-*d*<sub>6</sub>)

Item name: Yes-7  
Item description:

Channel name: 1: Average Time 0.1089 min : TOF MS (50-1500) ESI+ : Centroided : Combined

1.71e7

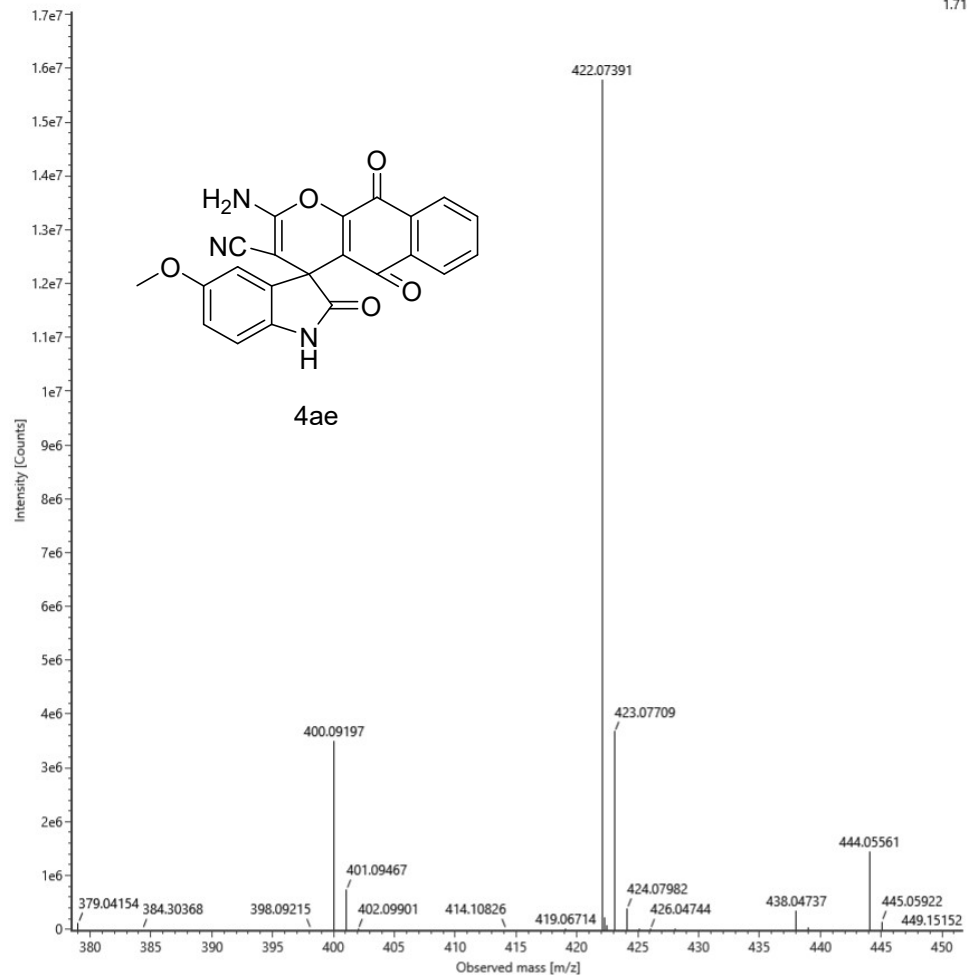

HRMS of Compound 4ae

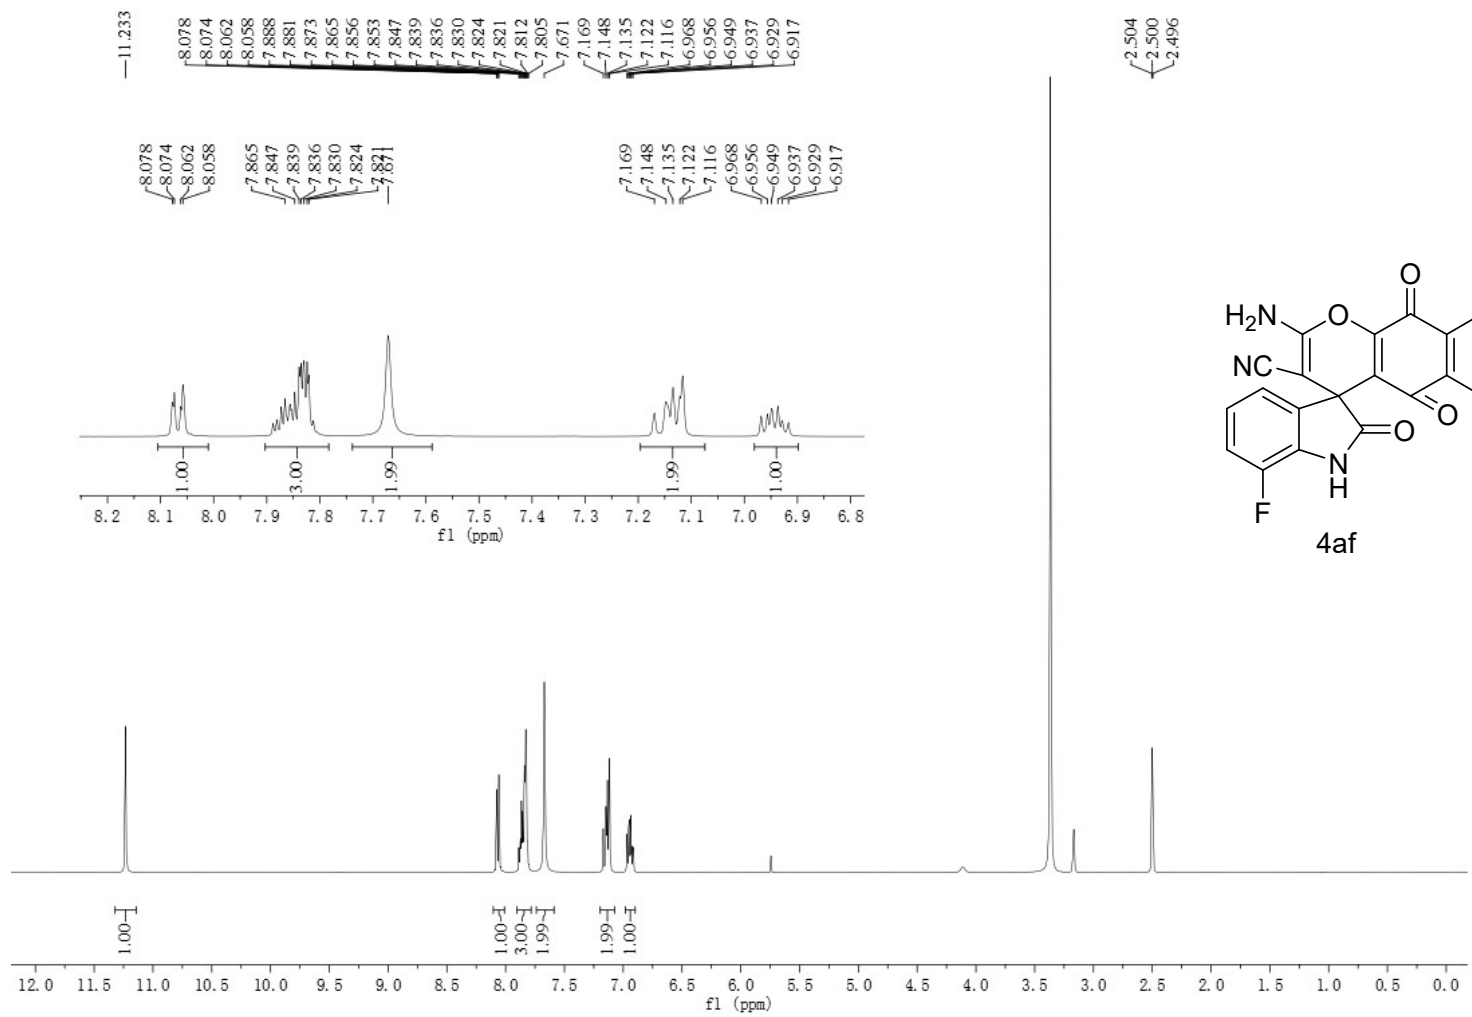

<sup>1</sup>H NMR of Compound **4af** (400 MHz, DMSO-*d*<sub>6</sub>)

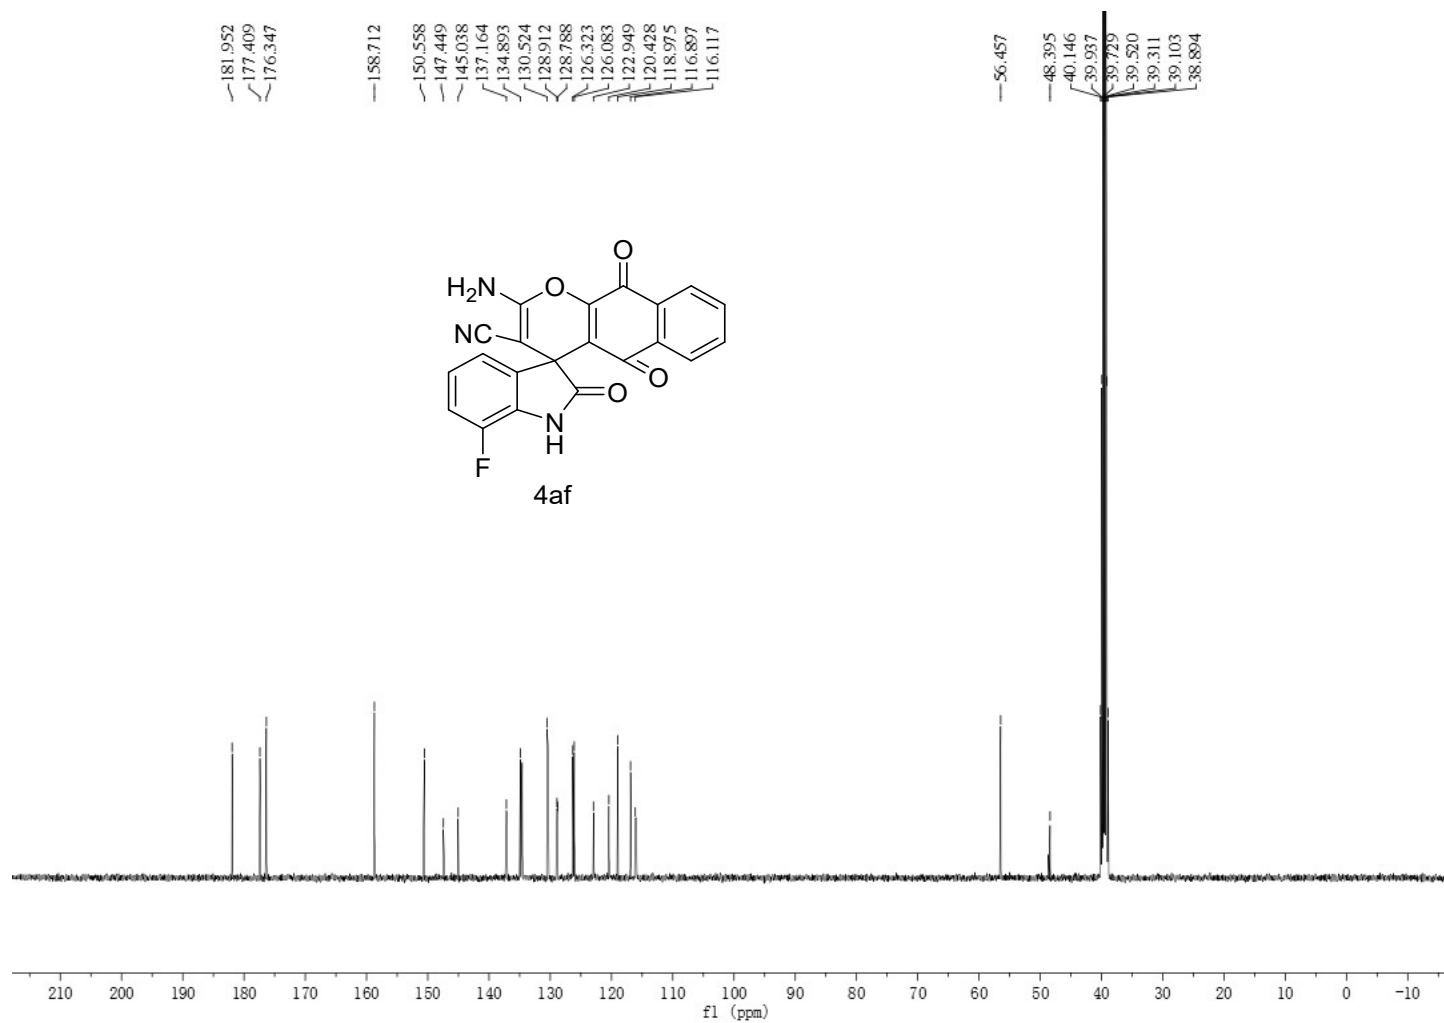

<sup>13</sup>C NMR of Compound **4af** (101 MHz, DMSO-*d*<sub>6</sub>)

Item name: Yes-8  
Item description:

Channel name: 1: Average Time 0.1174 min : TOF MS (50-1500) ESI+ : Centroided : Combined

1.44e7

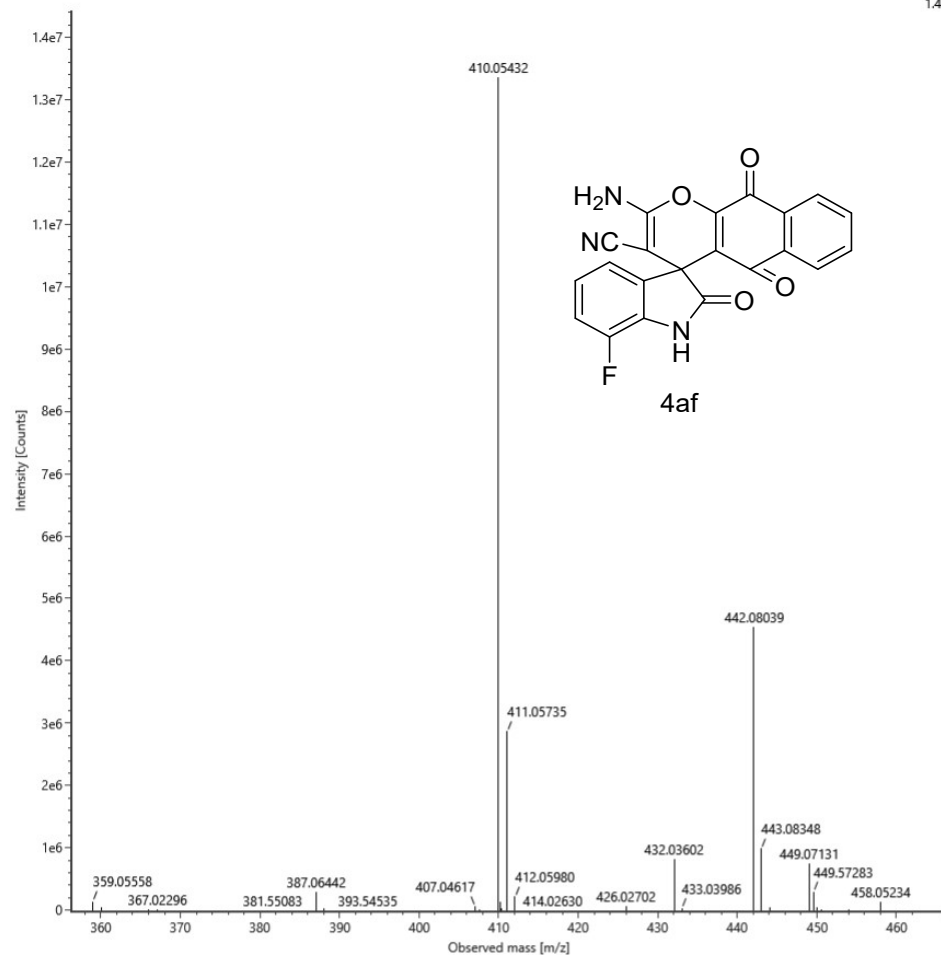

HRMS of Compound **4af**

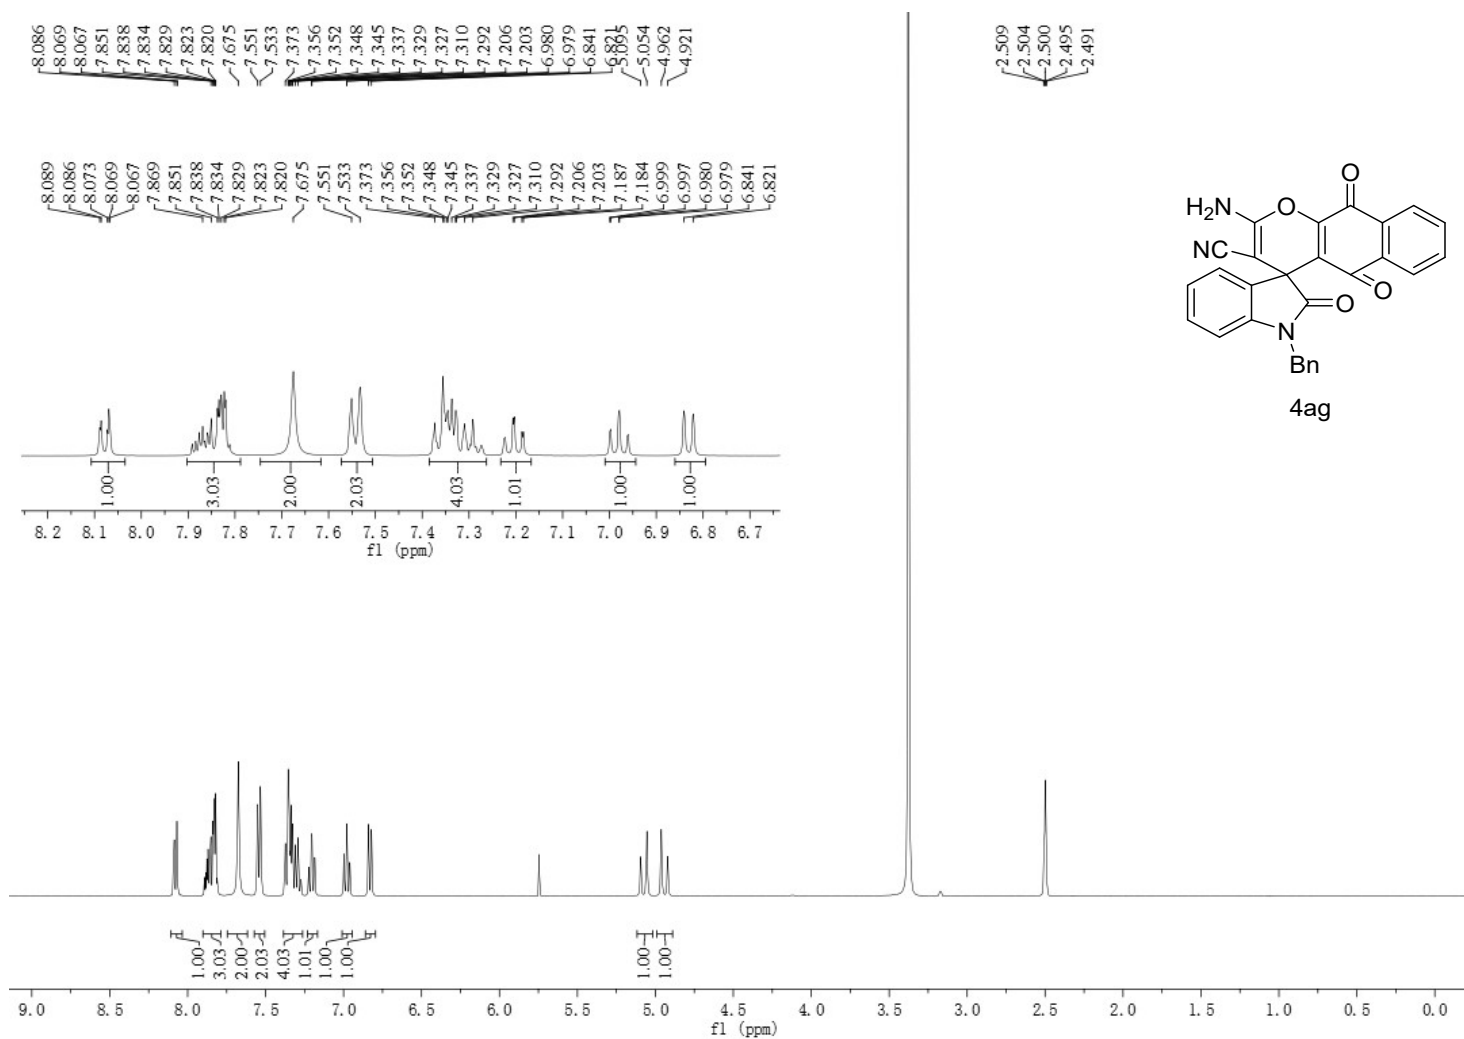

**<sup>1</sup>H NMR of Compound 4ag (400 MHz, DMSO-*d*<sub>6</sub>)**

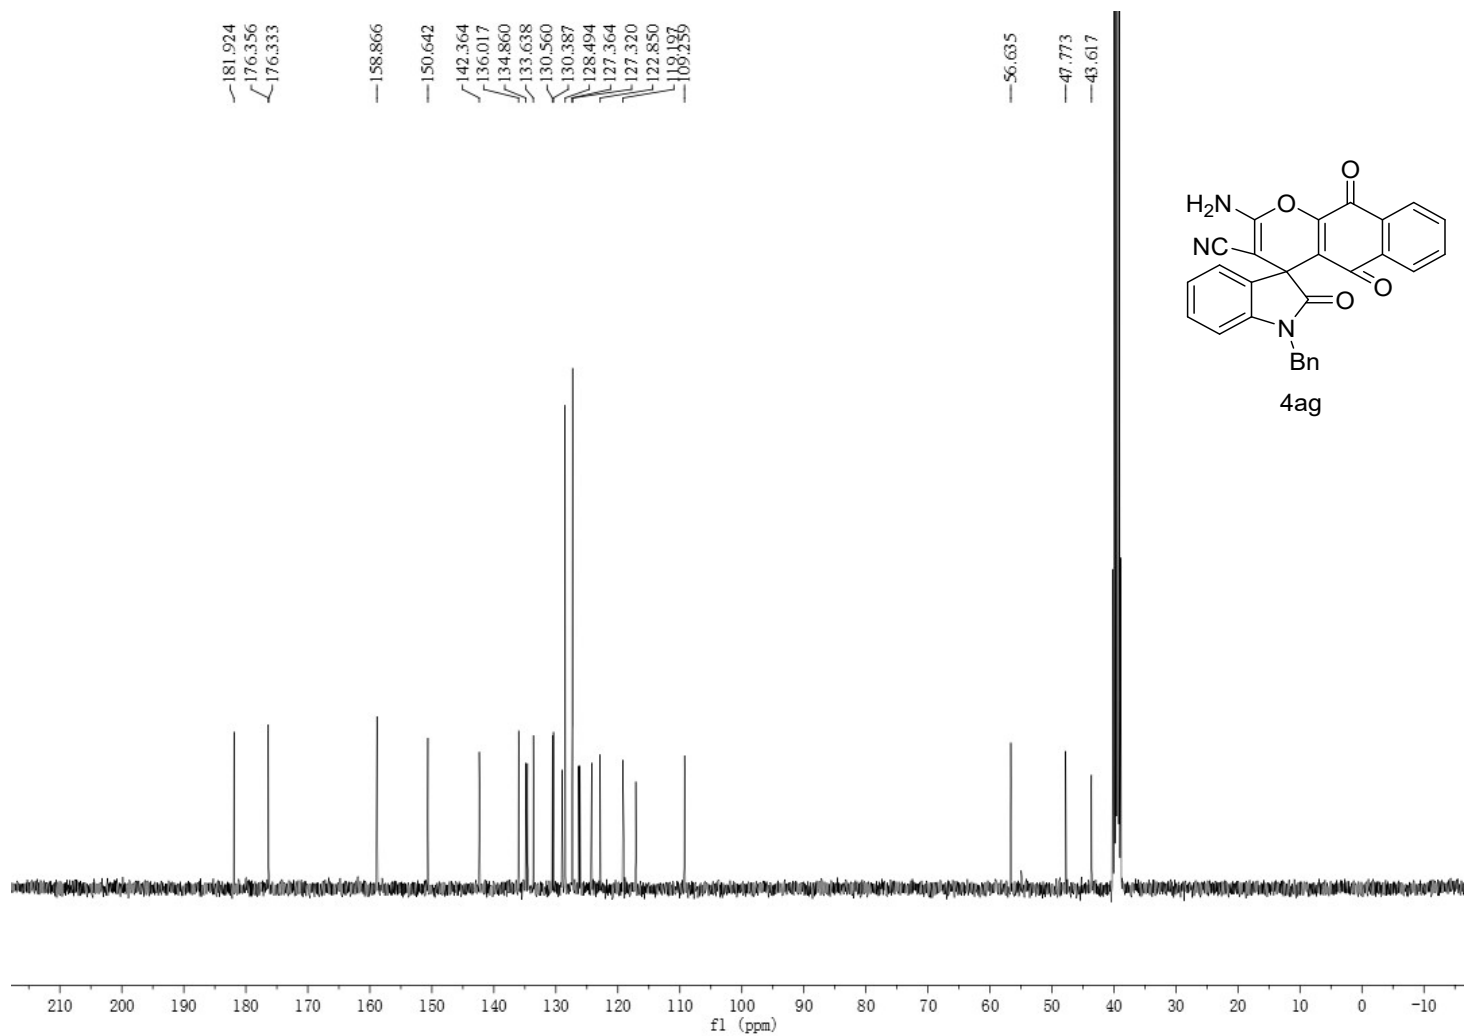

<sup>13</sup>C NMR of Compound **4ag** (101 MHz, DMSO-*d*<sub>6</sub>)

Item name: Yes-10  
Item description:

Channel name: 1: Average Time 0.1217 min : TOF MS (50-1500) ESI+ : Centroided : Combined

2.24e7

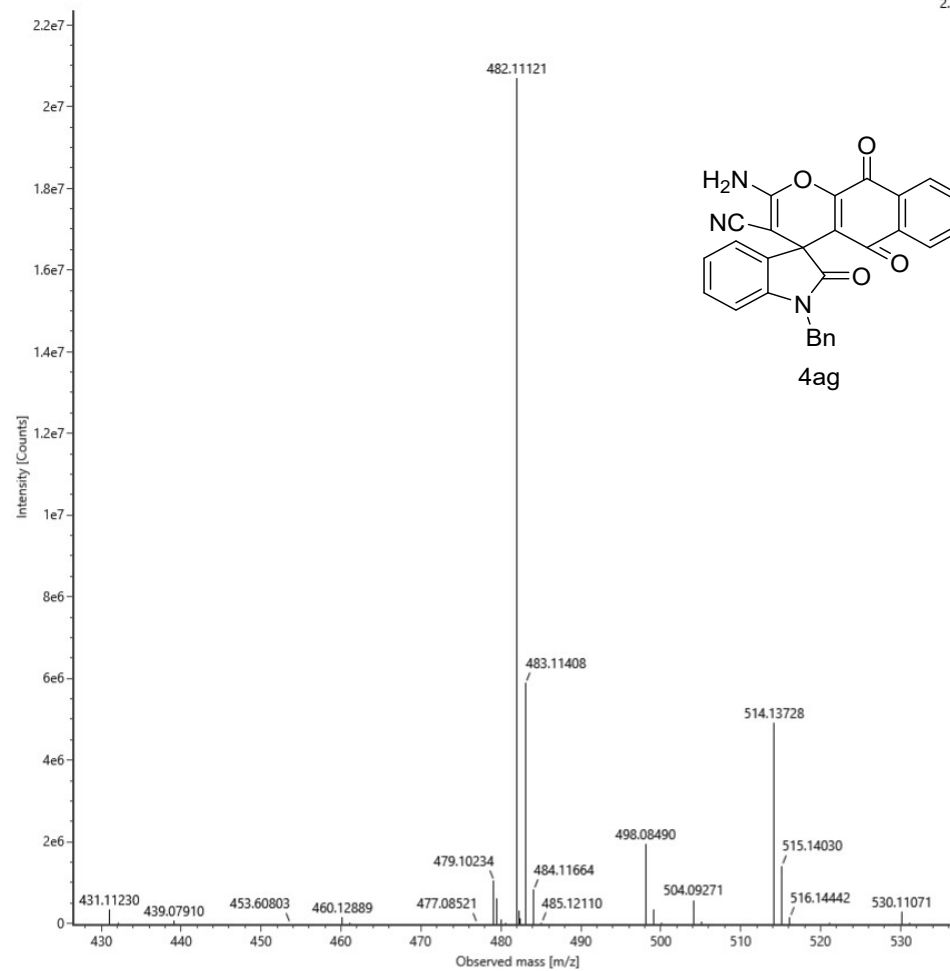

HRMS of Compound **4ag**



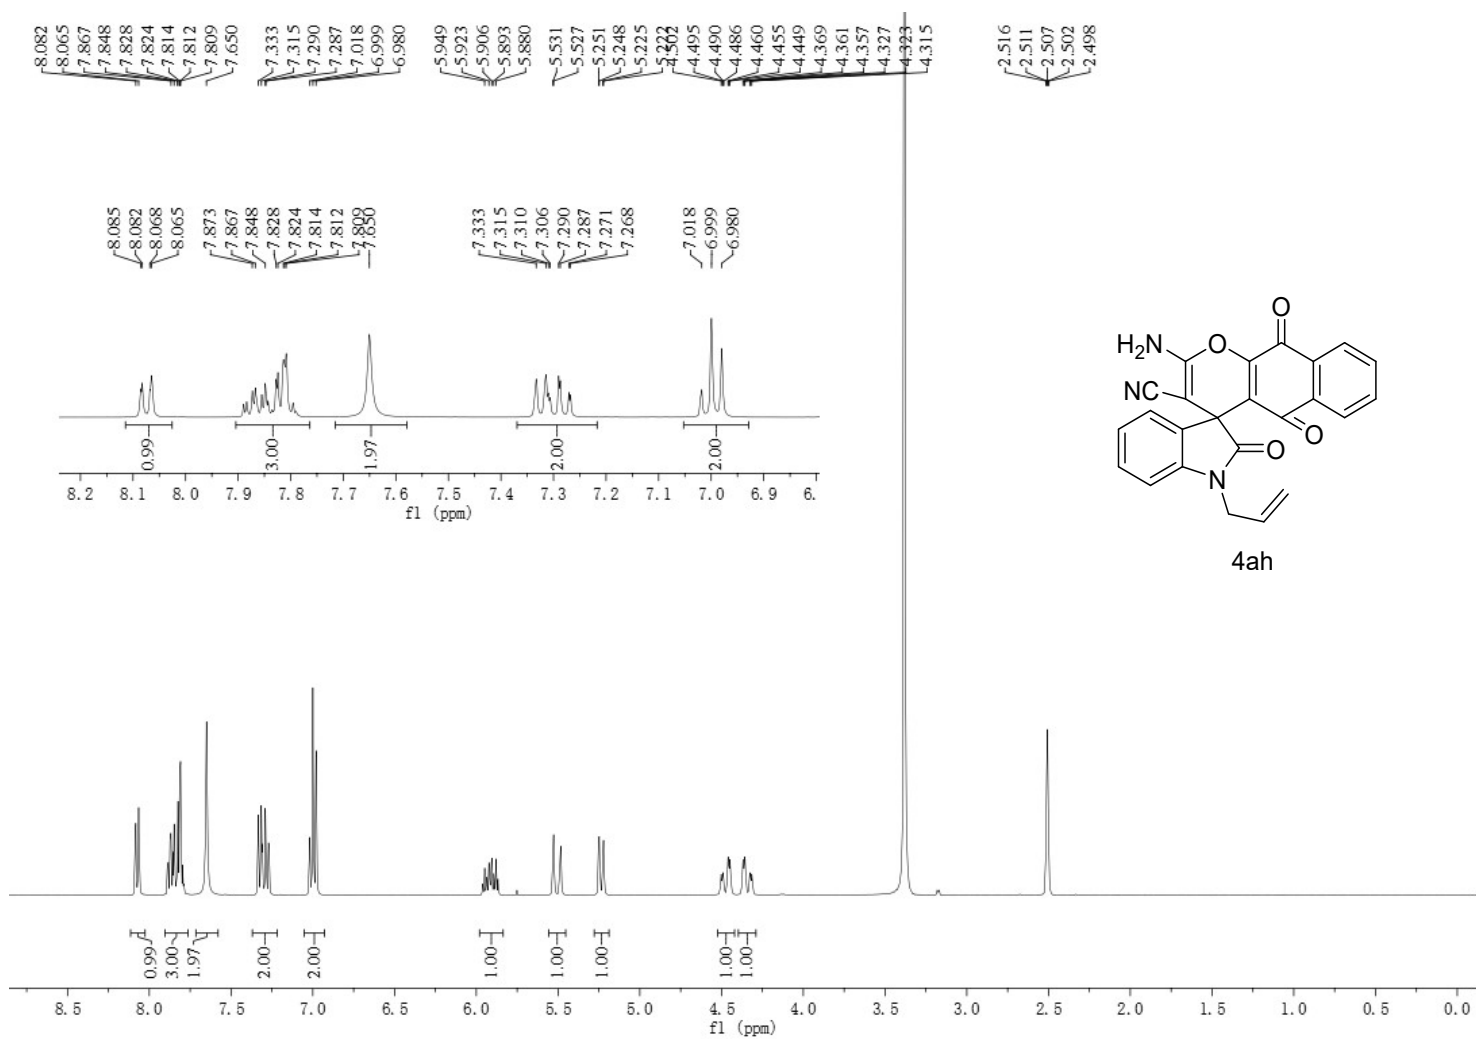

<sup>1</sup>H NMR of Compound **4ah** (400 MHz, DMSO-*d*<sub>6</sub>)

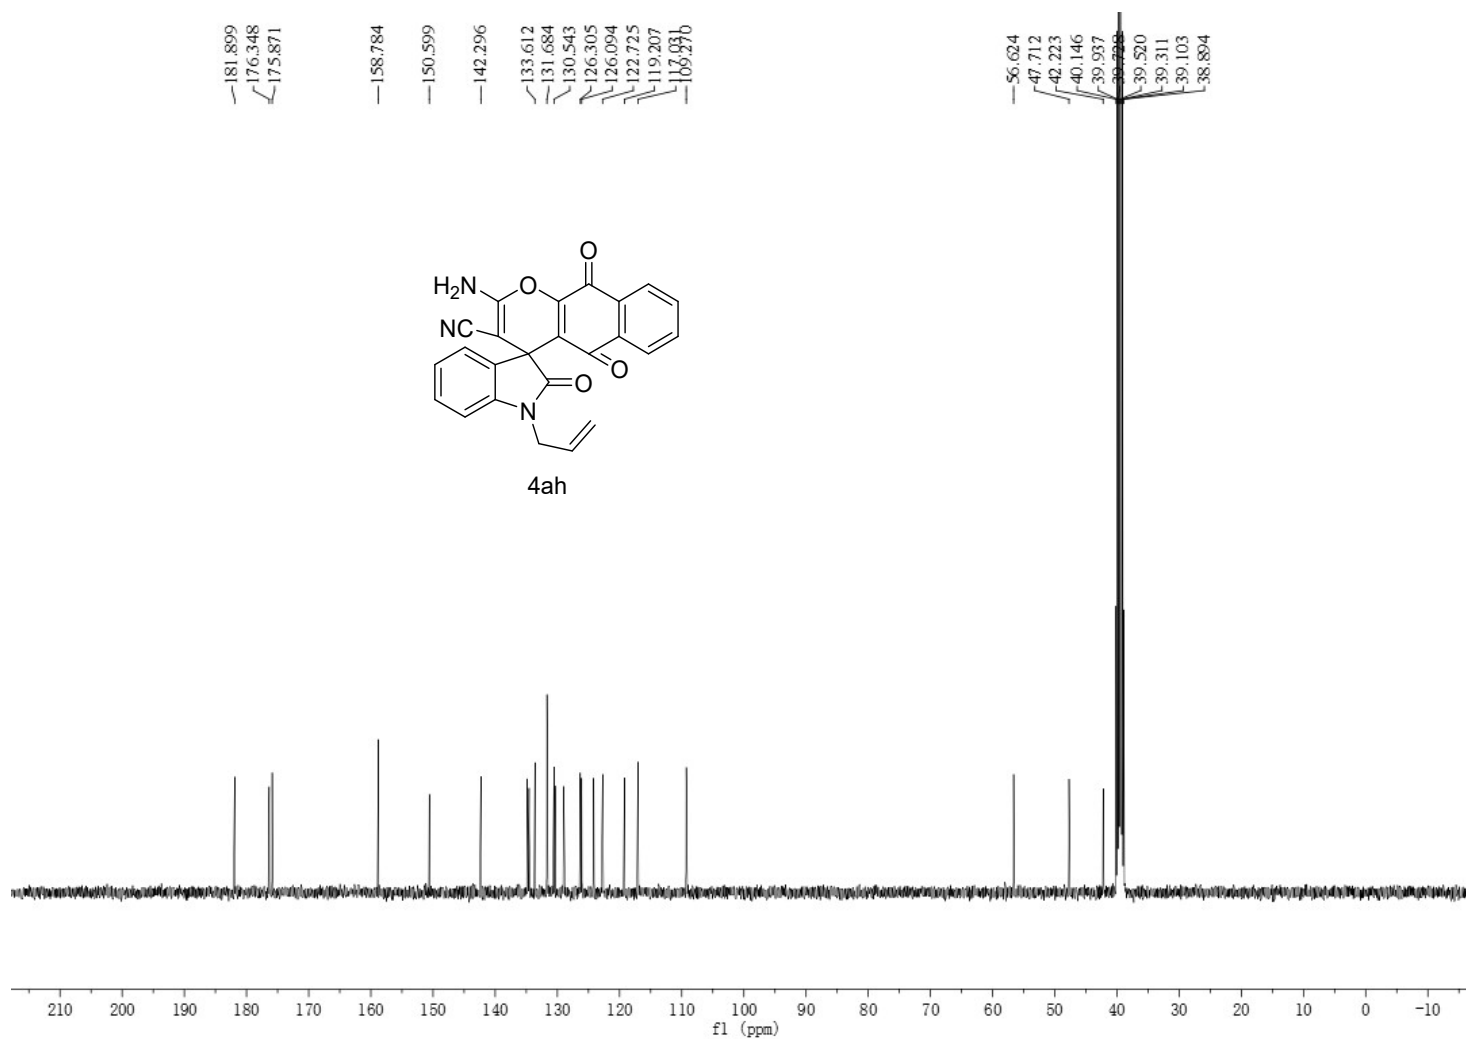

<sup>13</sup>C NMR of Compound **4ah** (101 MHz, DMSO-*d*<sub>6</sub>)

Item name: Yes-11-2  
Item description:

Channel name: 1: Average Time 0.1217 min : TOF MS (50-1500) ESI+ : Centroided : Combined

1.94e7

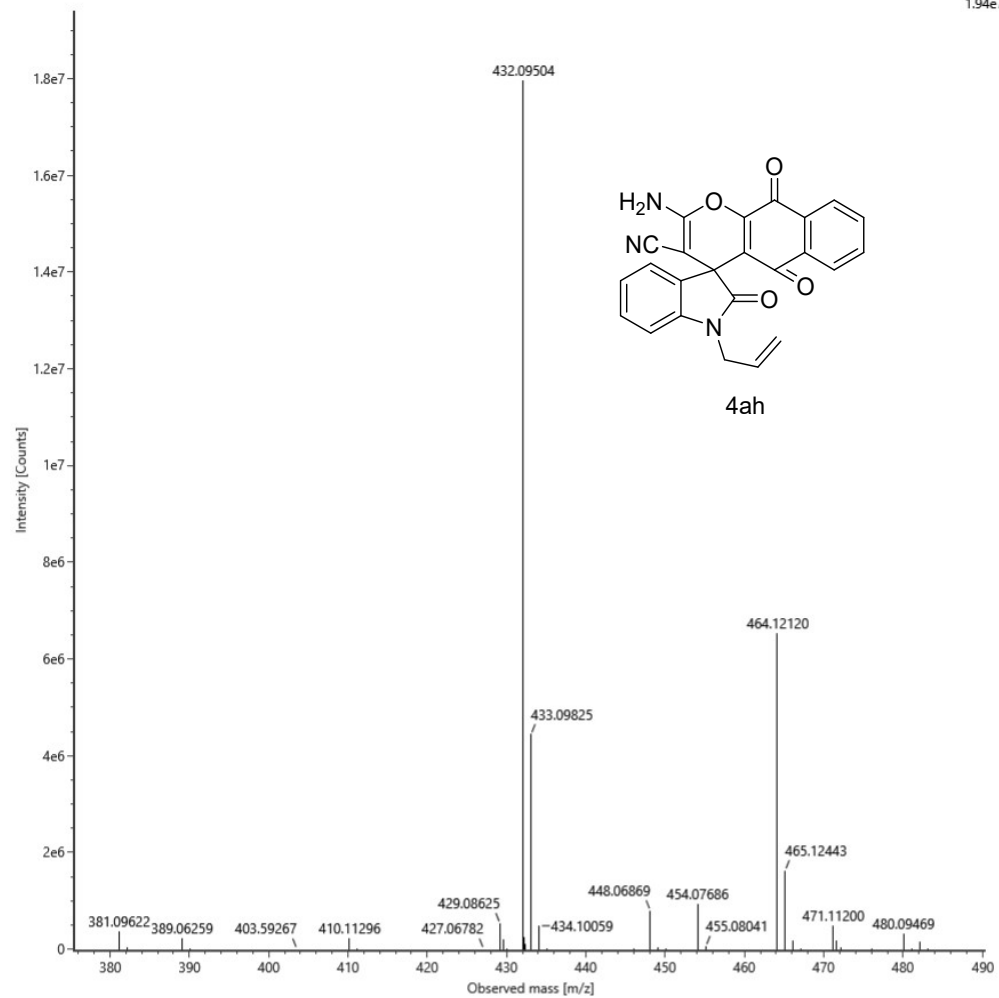

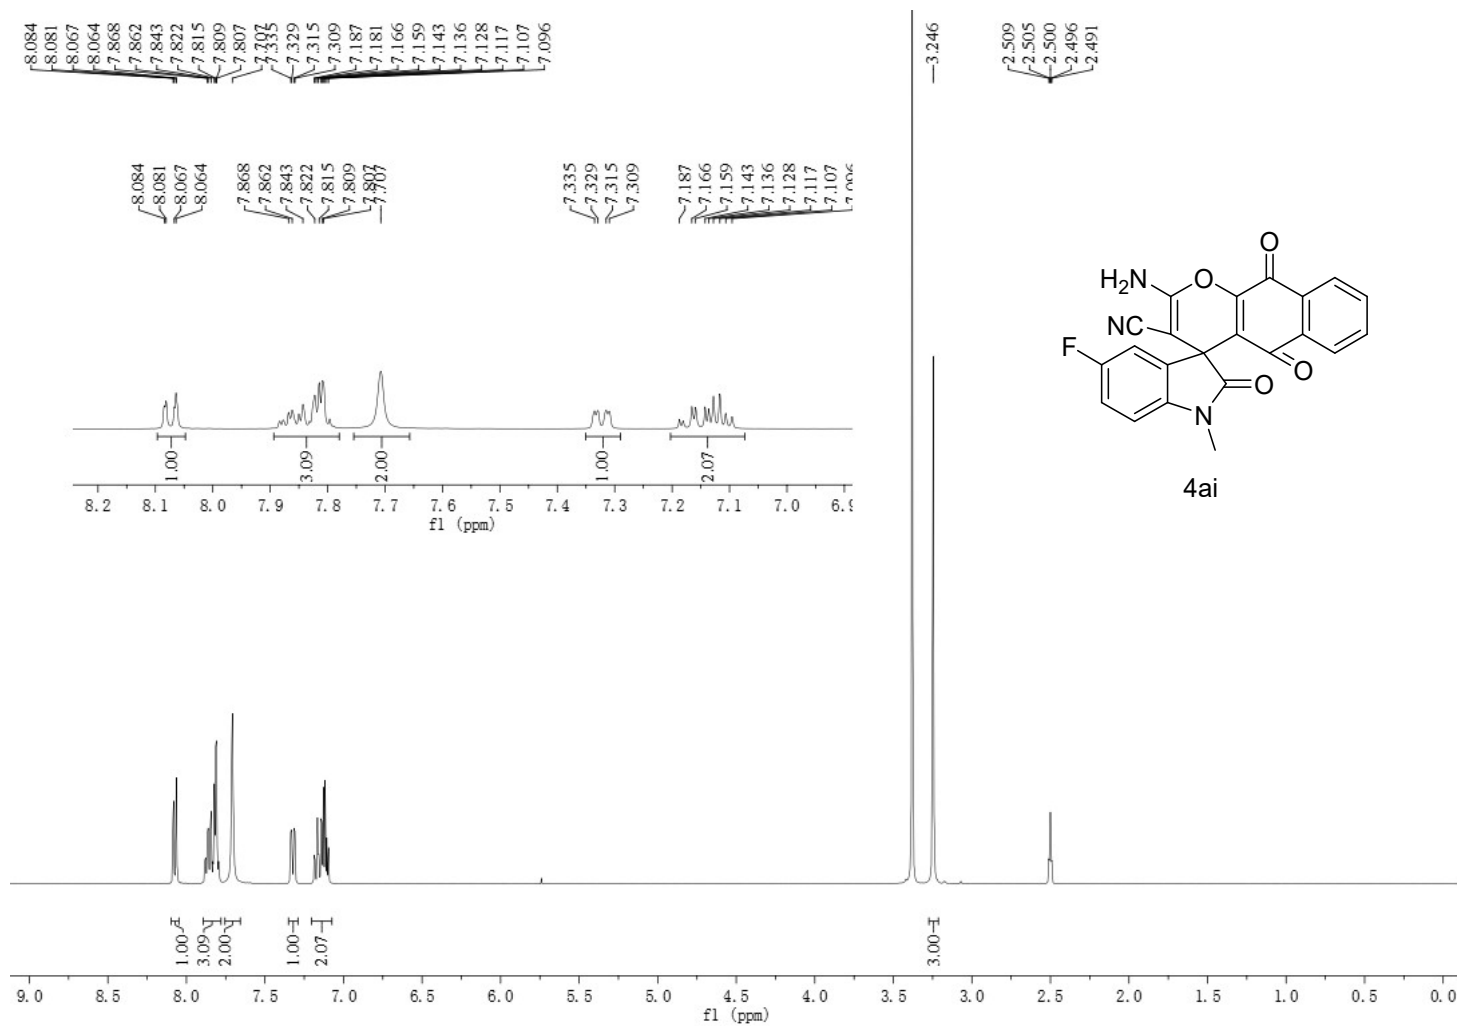

<sup>1</sup>H NMR of Compound 4ai (400 MHz, DMSO-*d*<sub>6</sub>)

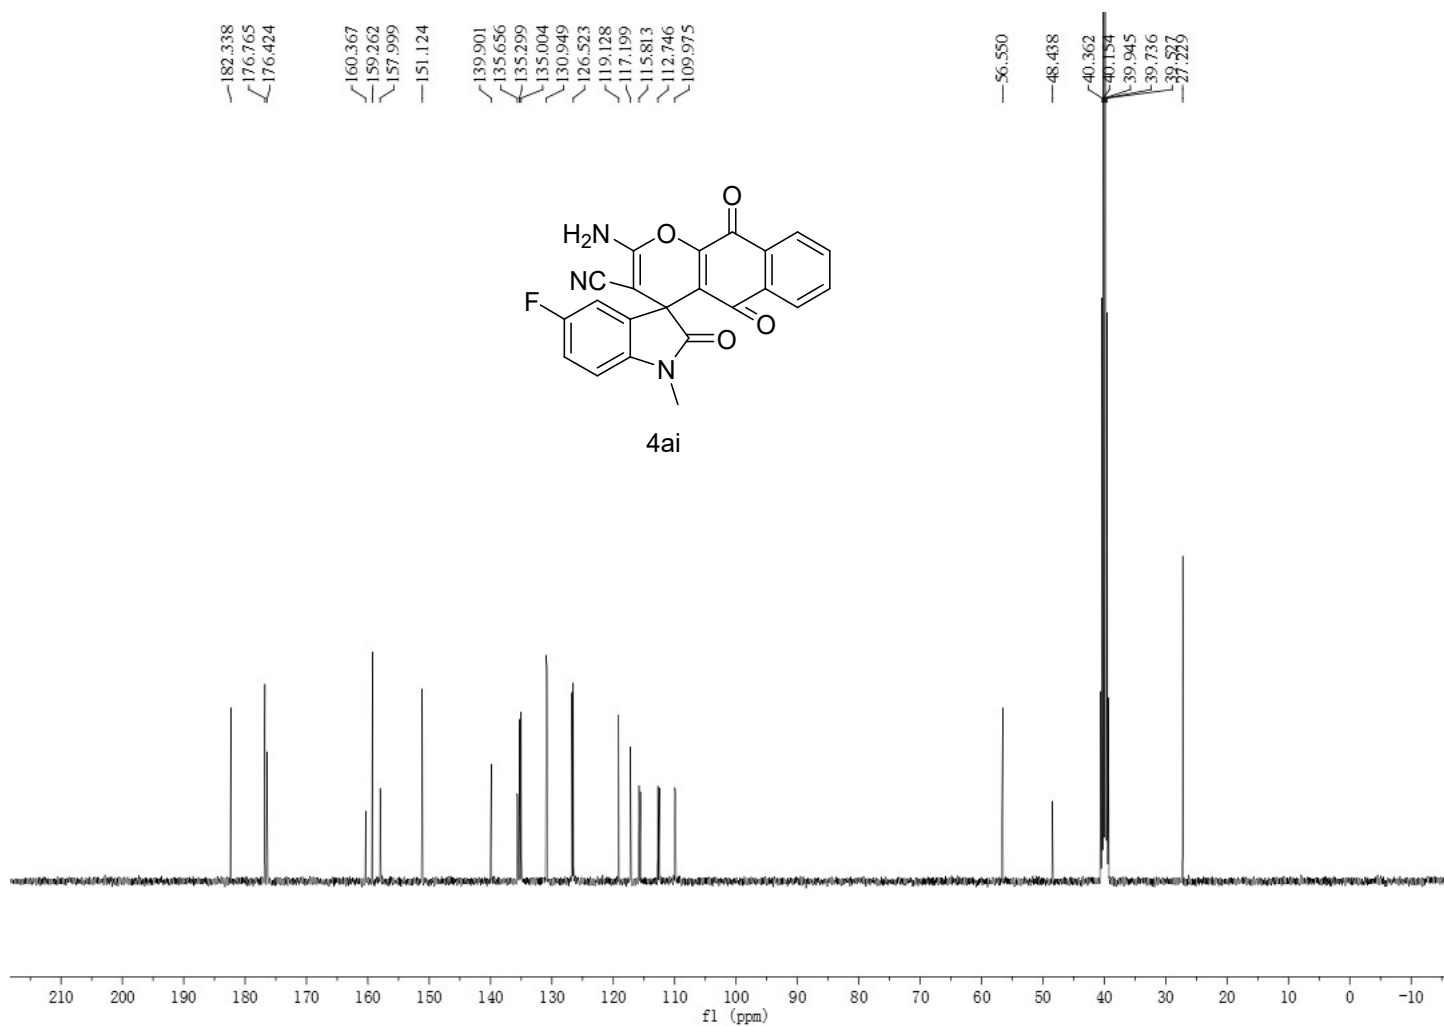

<sup>13</sup>C NMR of Compound **4ai** (101 MHz, DMSO-*d*<sub>6</sub>)

Item name: Yes-12  
Item description:

Channel name: 1: Average Time 0.1089 min : TOF MS (50-1500) ESI+ : Centroided : Combined

1.53e7

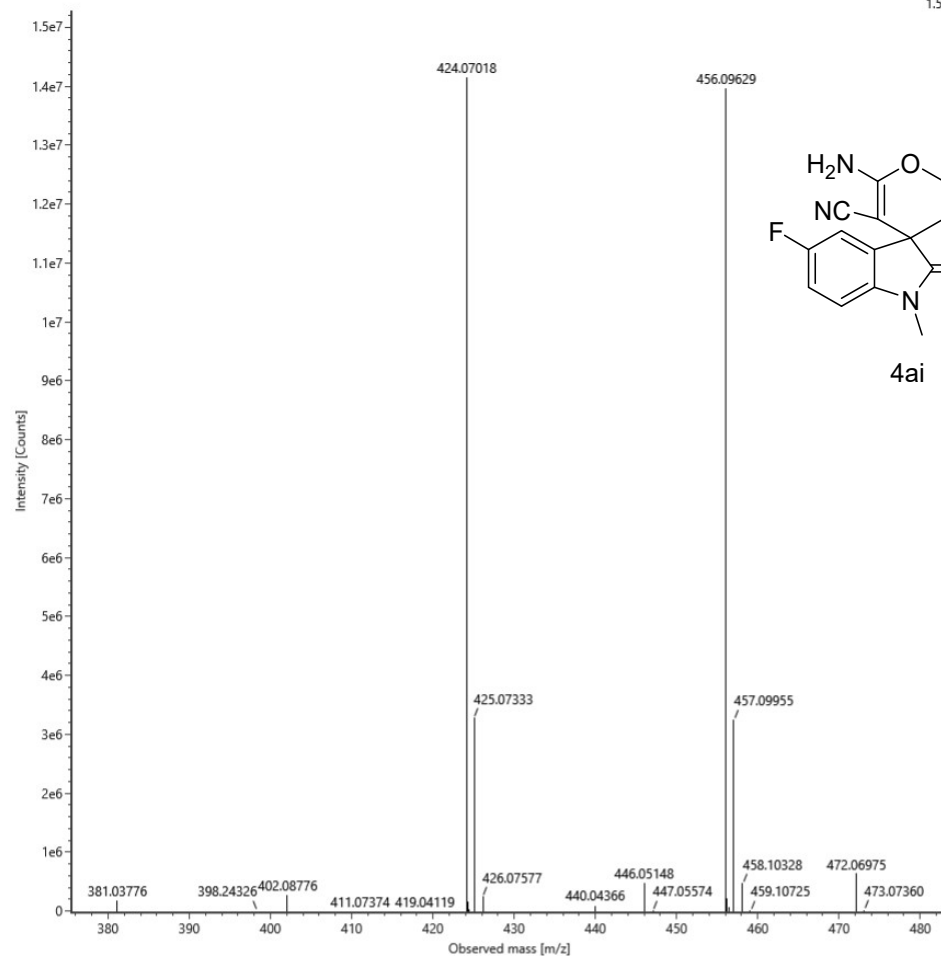

HRMS of Compound 4ai

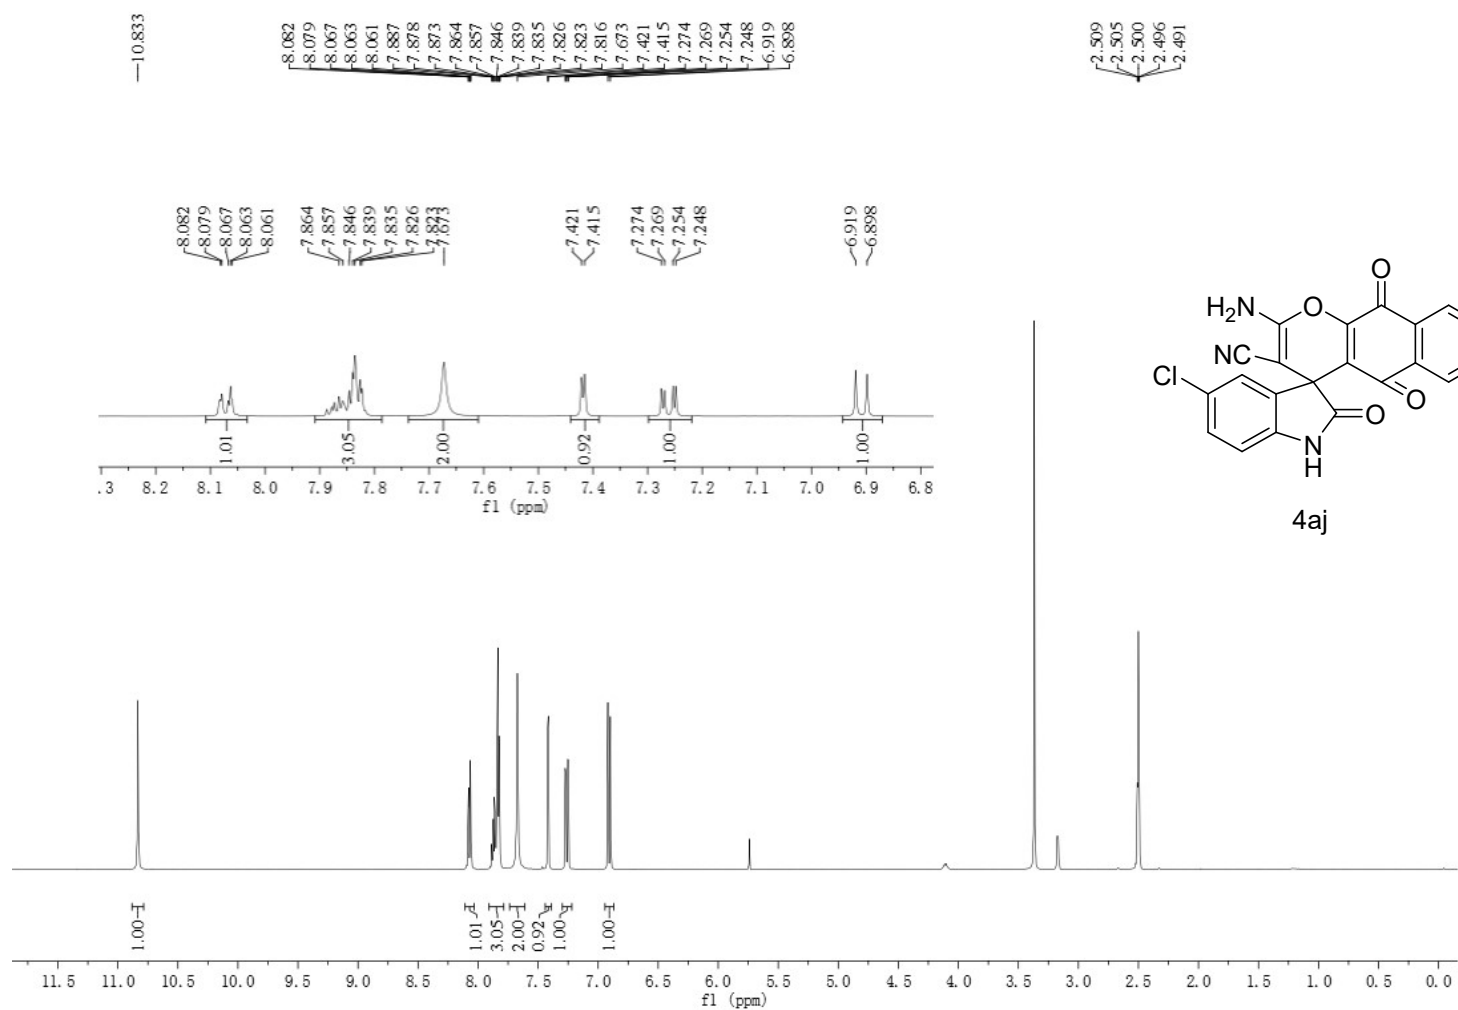

<sup>1</sup>H NMR of Compound 4aj (400 MHz, DMSO-*d*<sub>6</sub>)

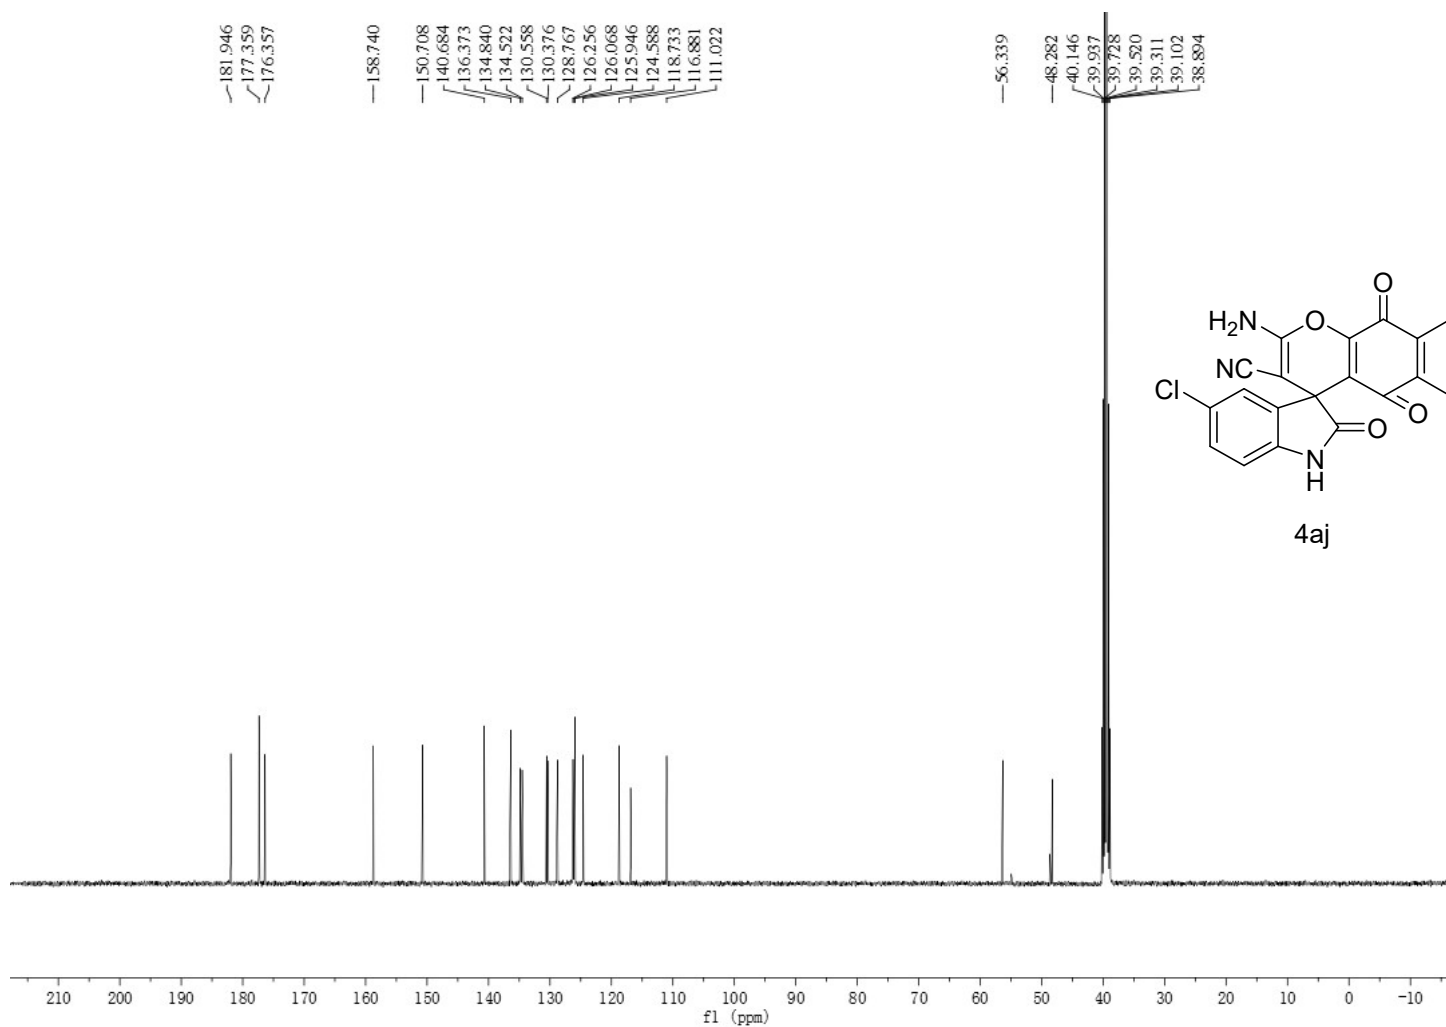

<sup>13</sup>C NMR of Compound **4aj** (101 MHz, DMSO-*d*<sub>6</sub>)



Item name: Yes-15  
Item description:

Channel name: 1: Average Time 0.1132 min : TOF MS (50-1500) ESI+ : Centroided : Combined

5.05e6

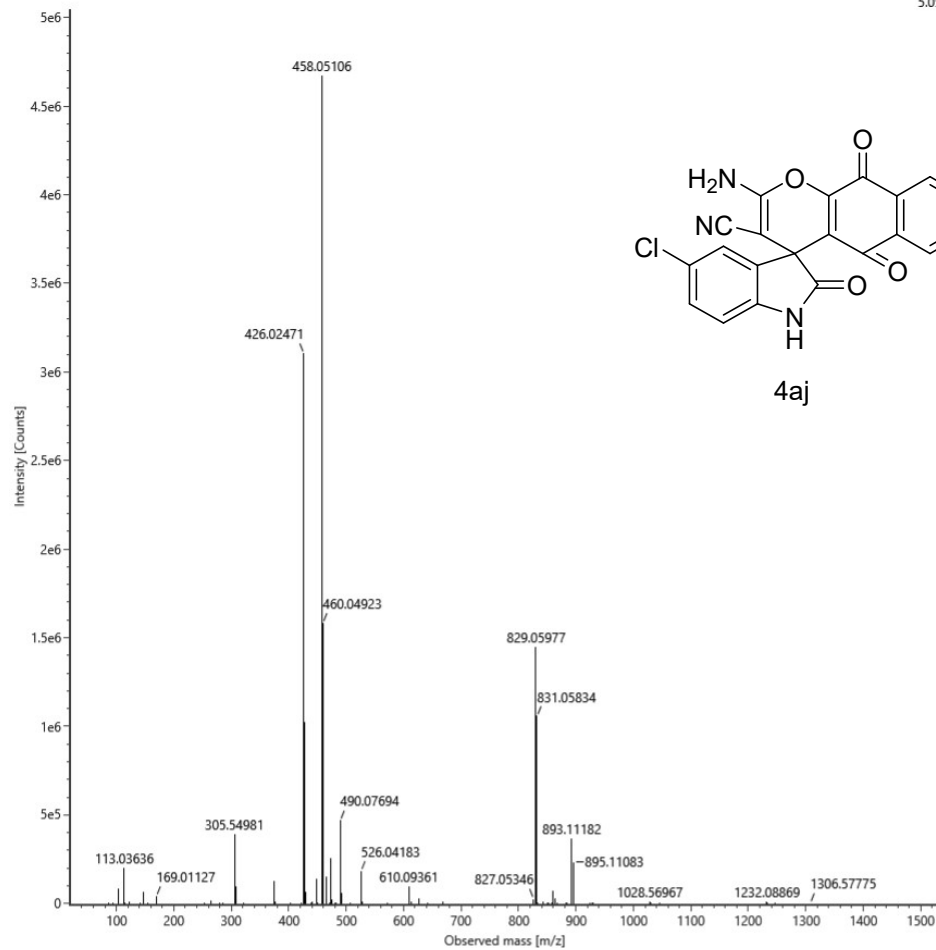

HRMS of Compound 4aj

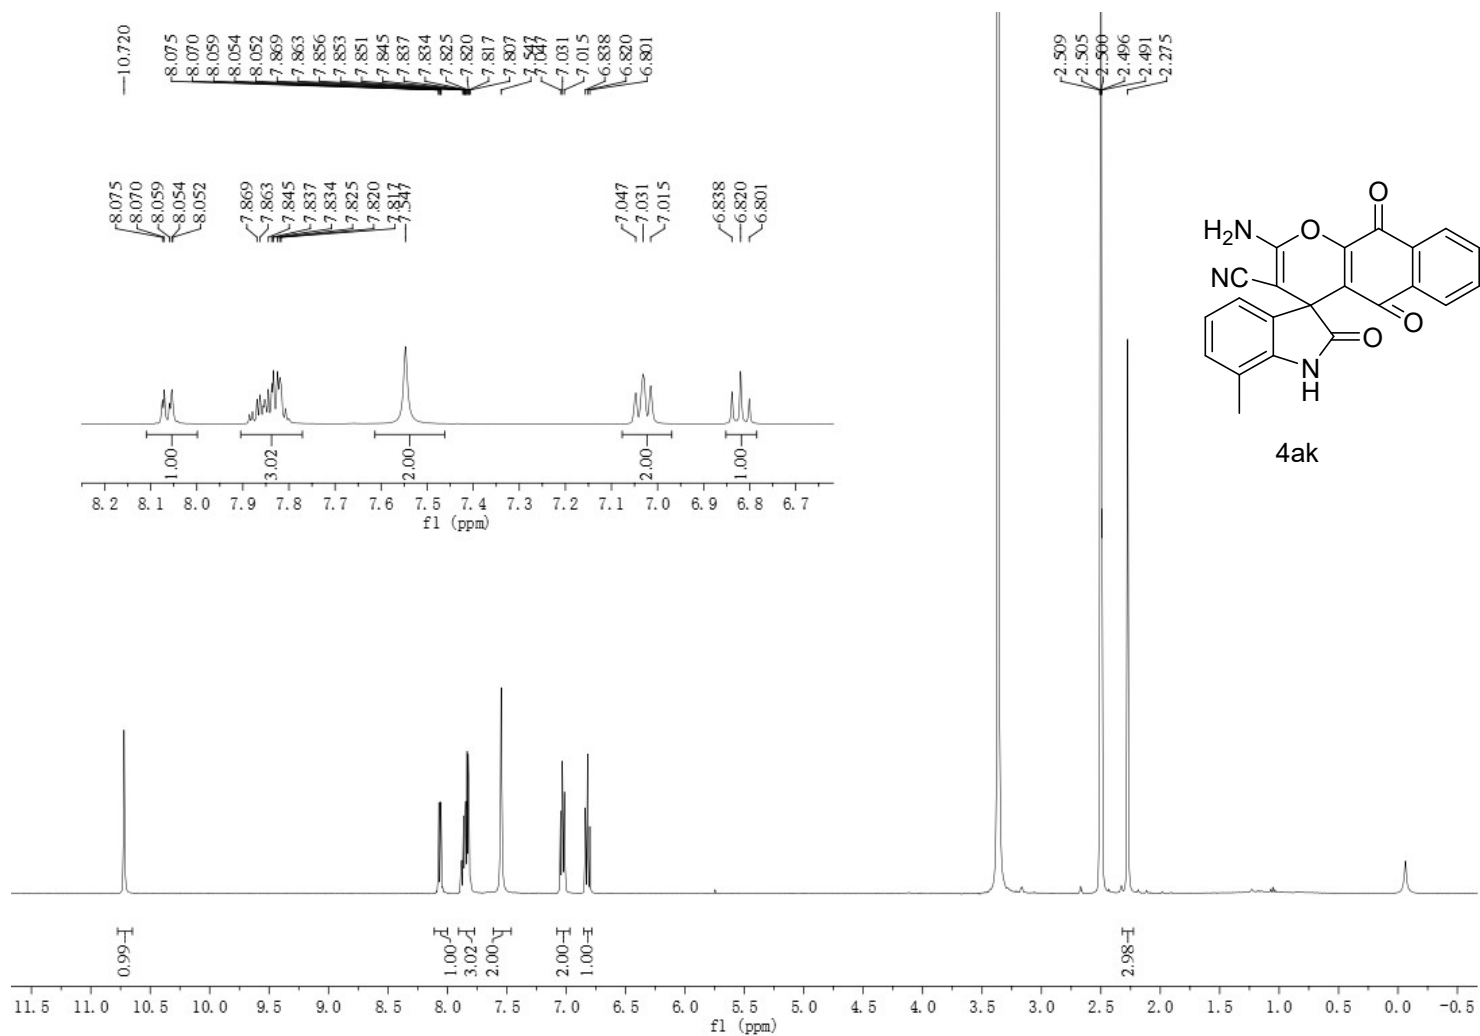

<sup>1</sup>H NMR of Compound **4ak** (400 MHz, DMSO-*d*<sub>6</sub>)

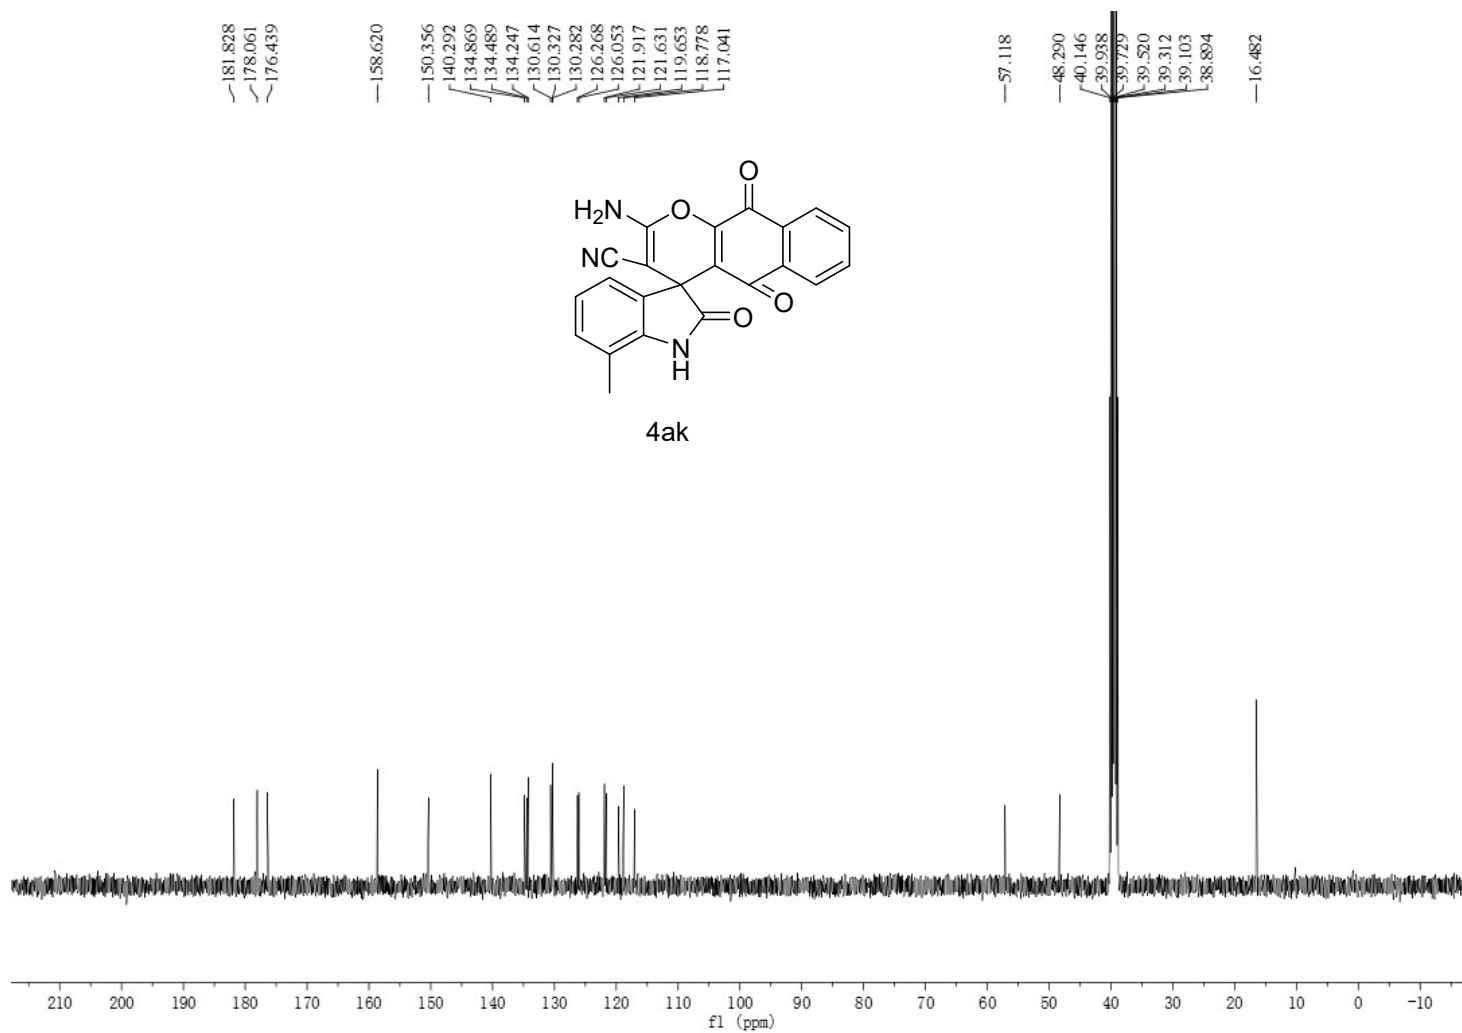

<sup>13</sup>C NMR of Compound **4ak** (101 MHz, DMSO-*d*<sub>6</sub>)

Item name: Yes-17  
Item description:

Channel name: 1: Average Time 0.1132 min : TOF MS (50-1500) ESI+ : Centroided : Combined

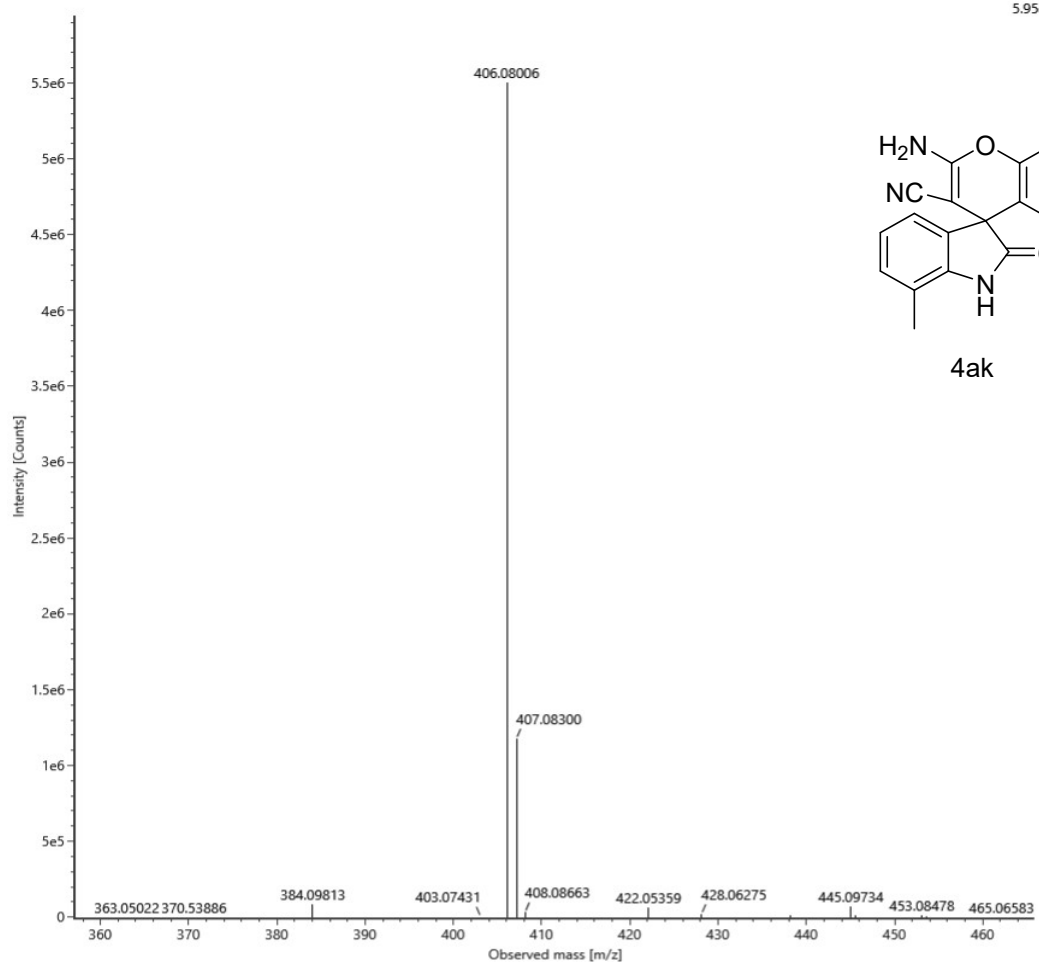

HRMS of Compound **4ak**

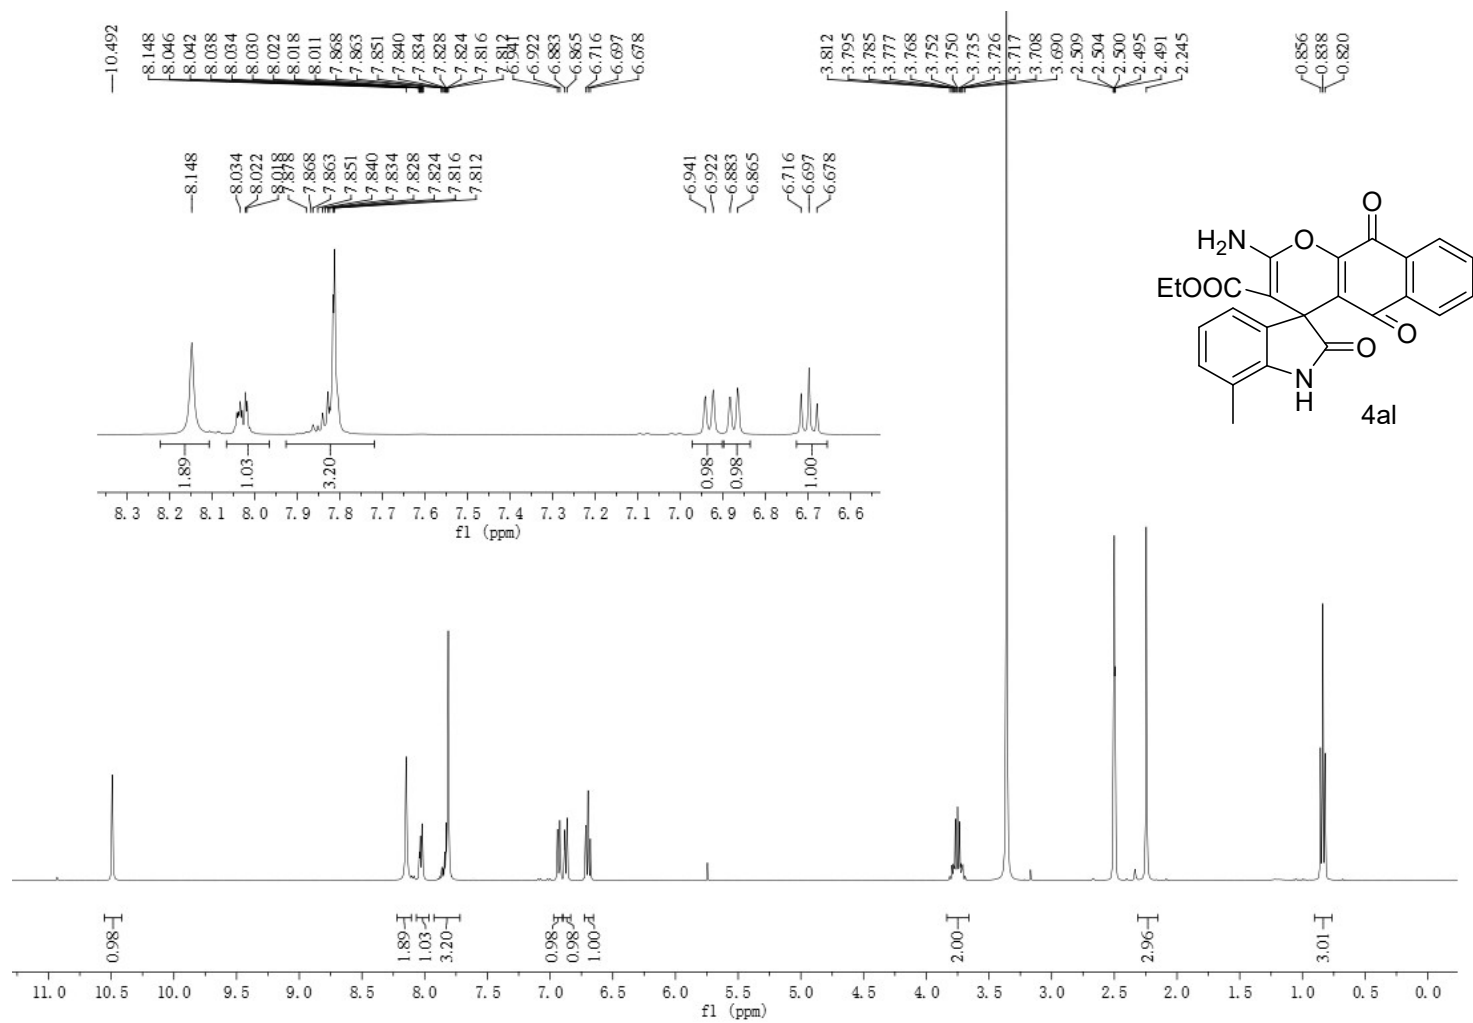

<sup>1</sup>H NMR of Compound **4al** (400 MHz, DMSO-*d*<sub>6</sub>)

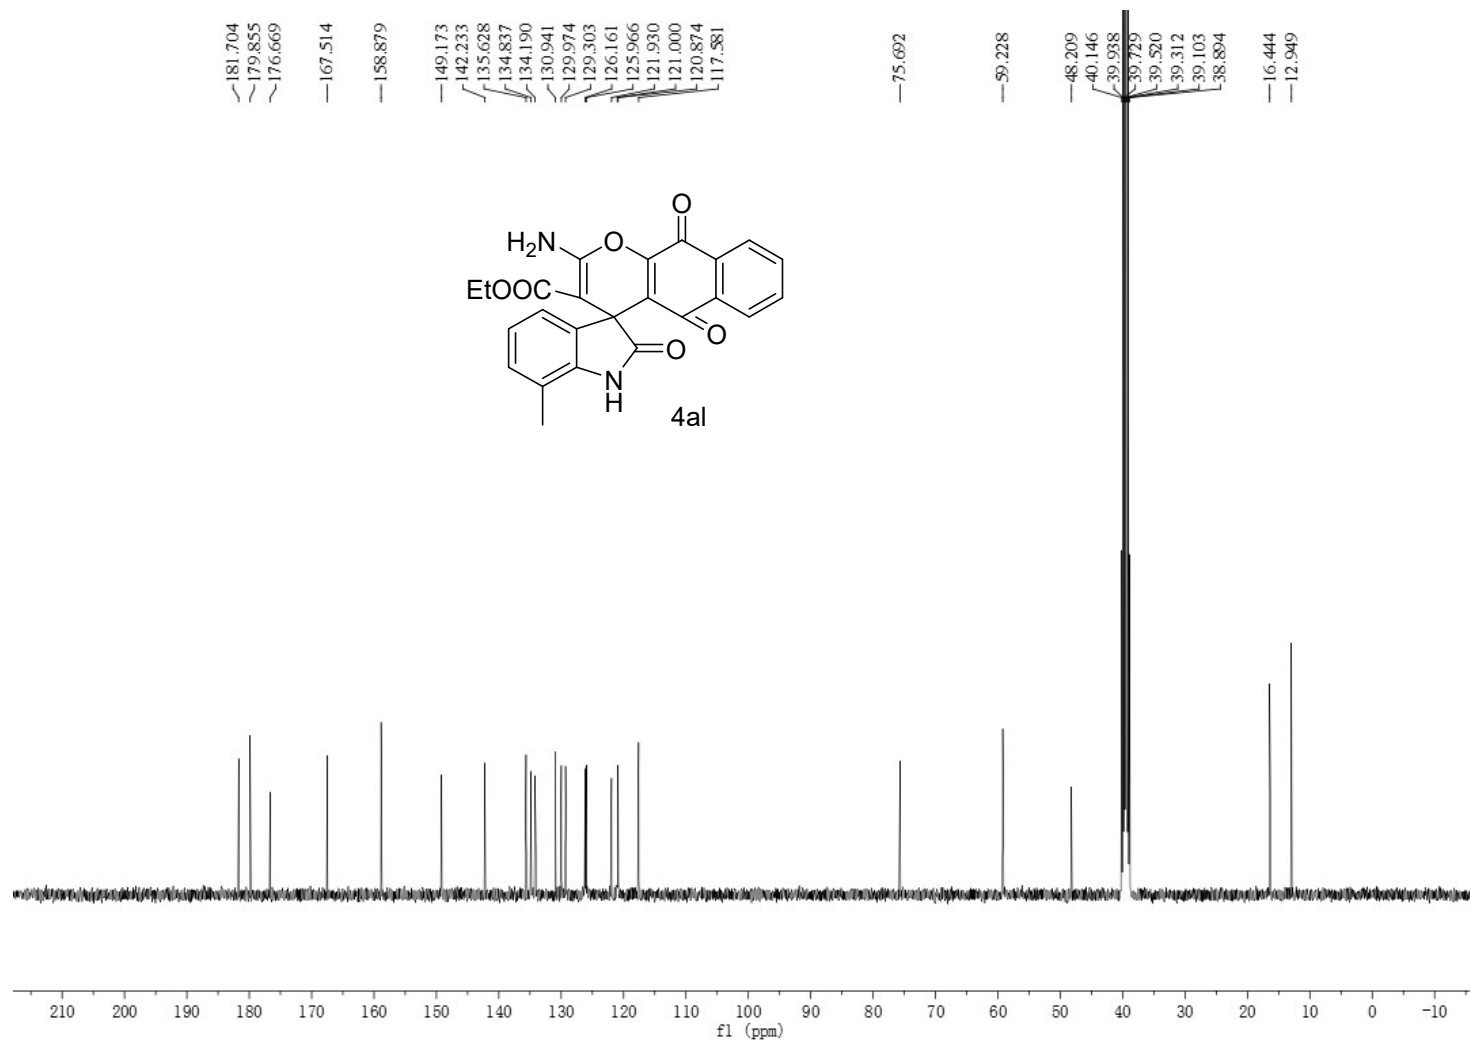

<sup>13</sup>C NMR of Compound **4al** (101 MHz, DMSO-*d*<sub>6</sub>)

Item name: Yes-20  
Item description:

Channel name: 1: Average Time 0.1174 min : TOF MS (50-1500) ESI+ : Centroided : Combined

1.49e7

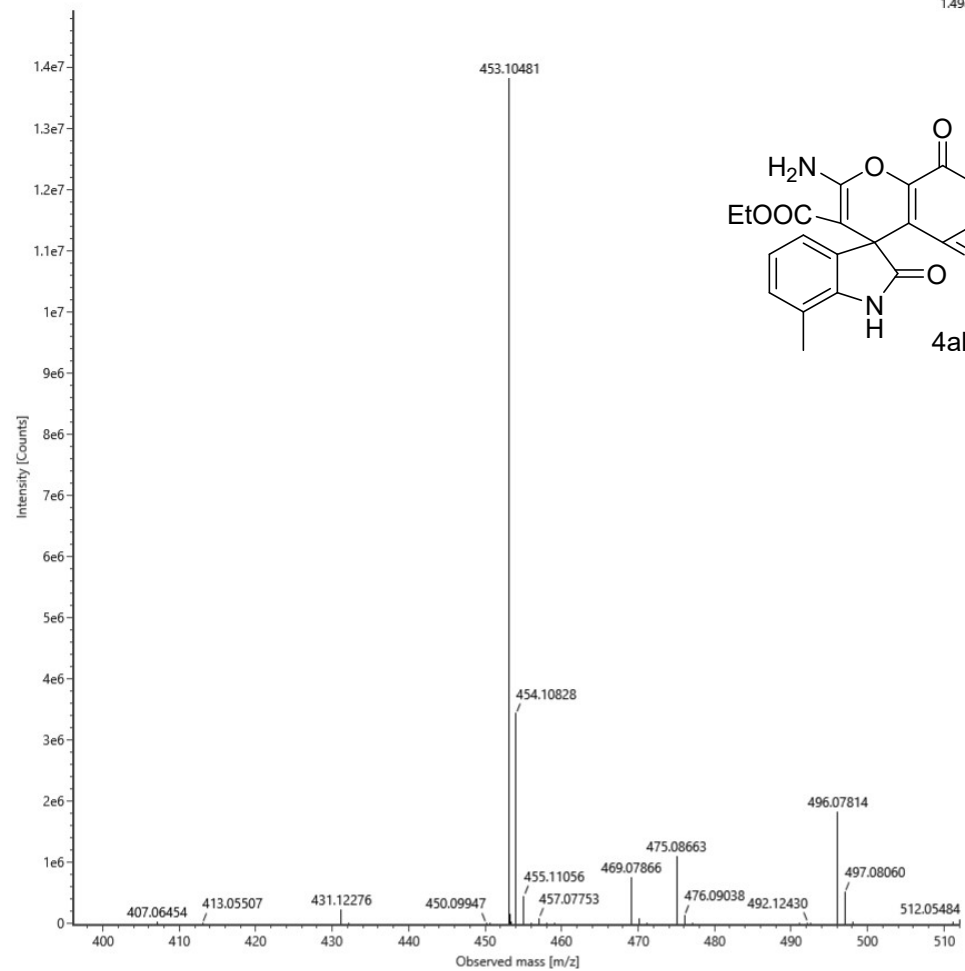

HRMS of Compound 4al

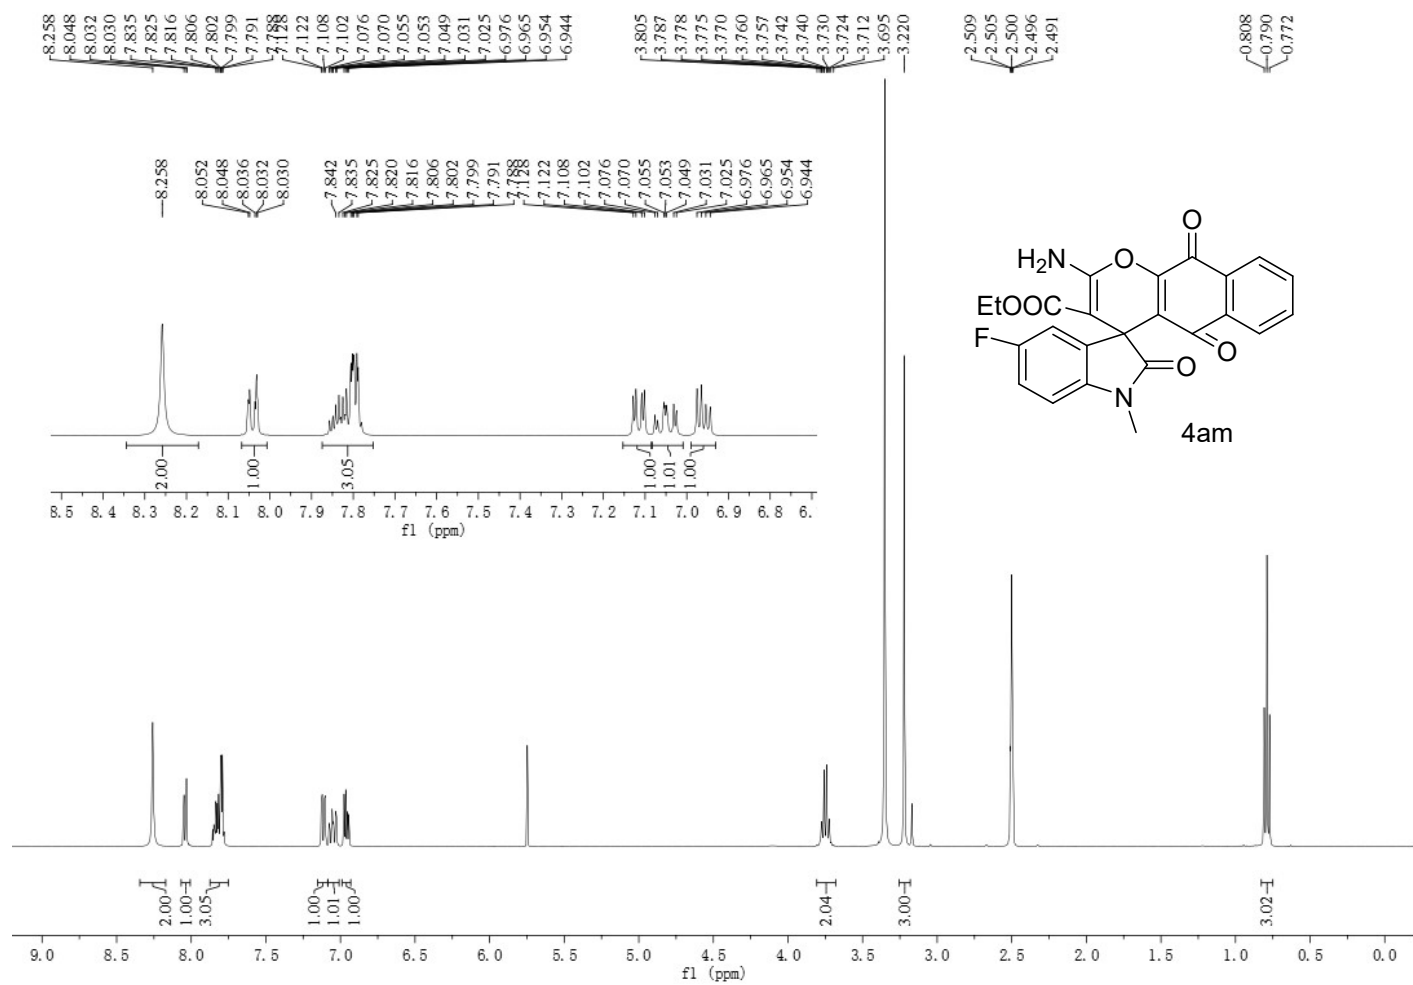

$^1\text{H}$  NMR of Compound **4am** (400 MHz,  $\text{DMSO-}d_6$ )



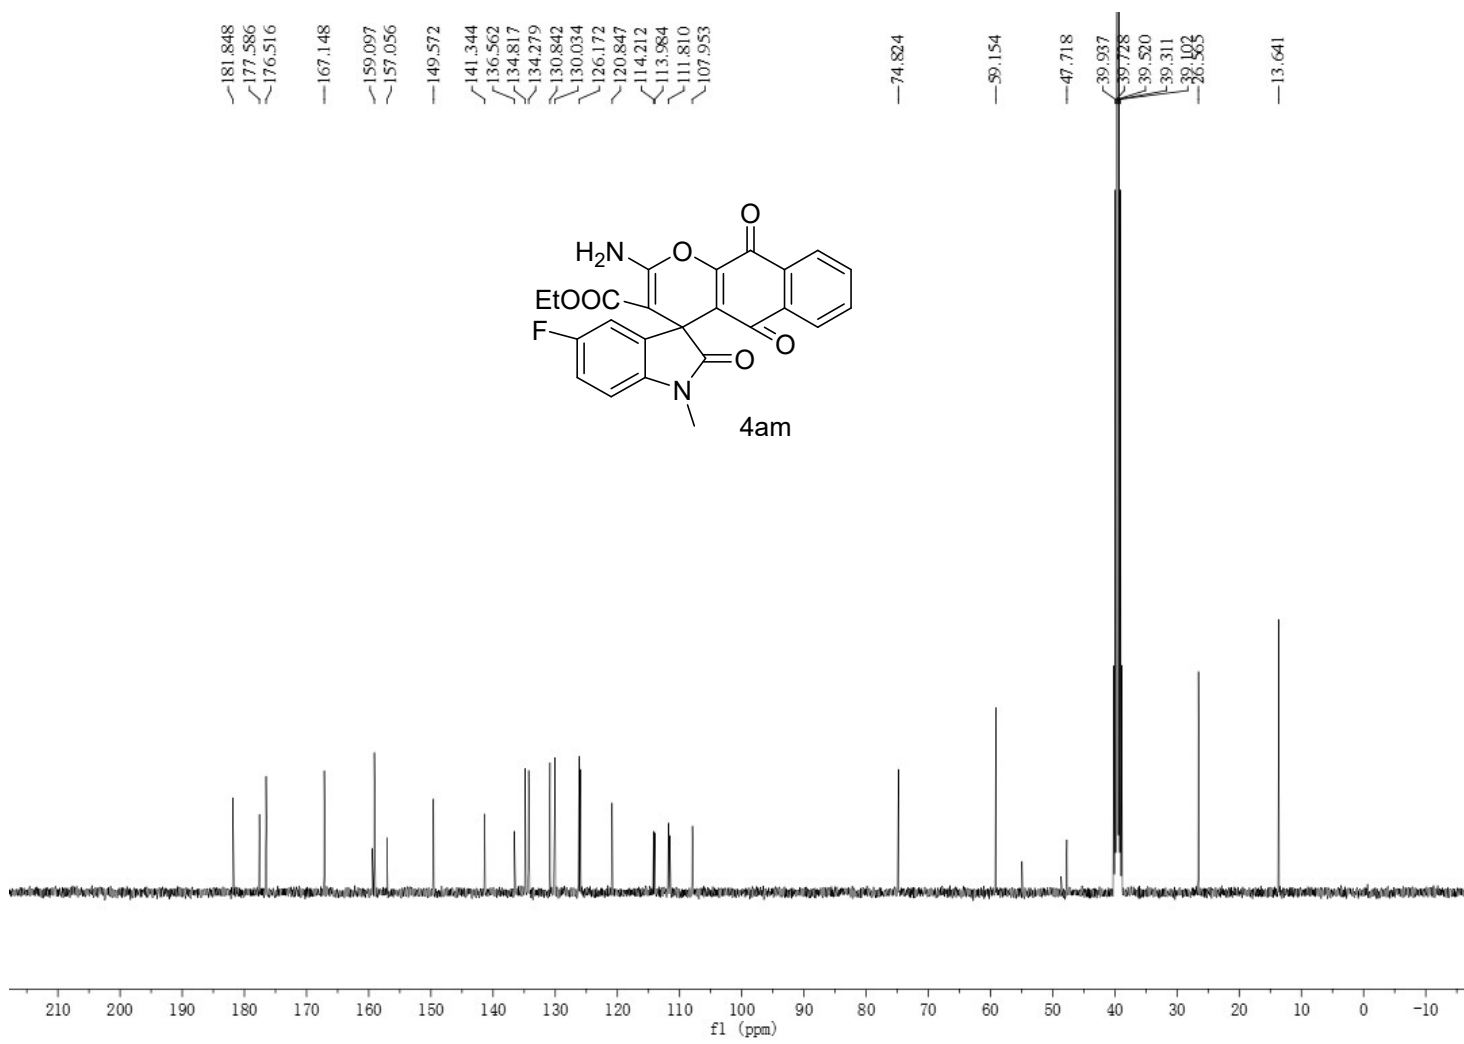

<sup>13</sup>C NMR of Compound **4am** (101 MHz, DMSO-*d*<sub>6</sub>)

Item name: Yes-21  
Item description:

Channel name: 1: Average Time 0.1217 min : TOF MS (50-1500) ESI+ : Centroided : Combined

2.36e7

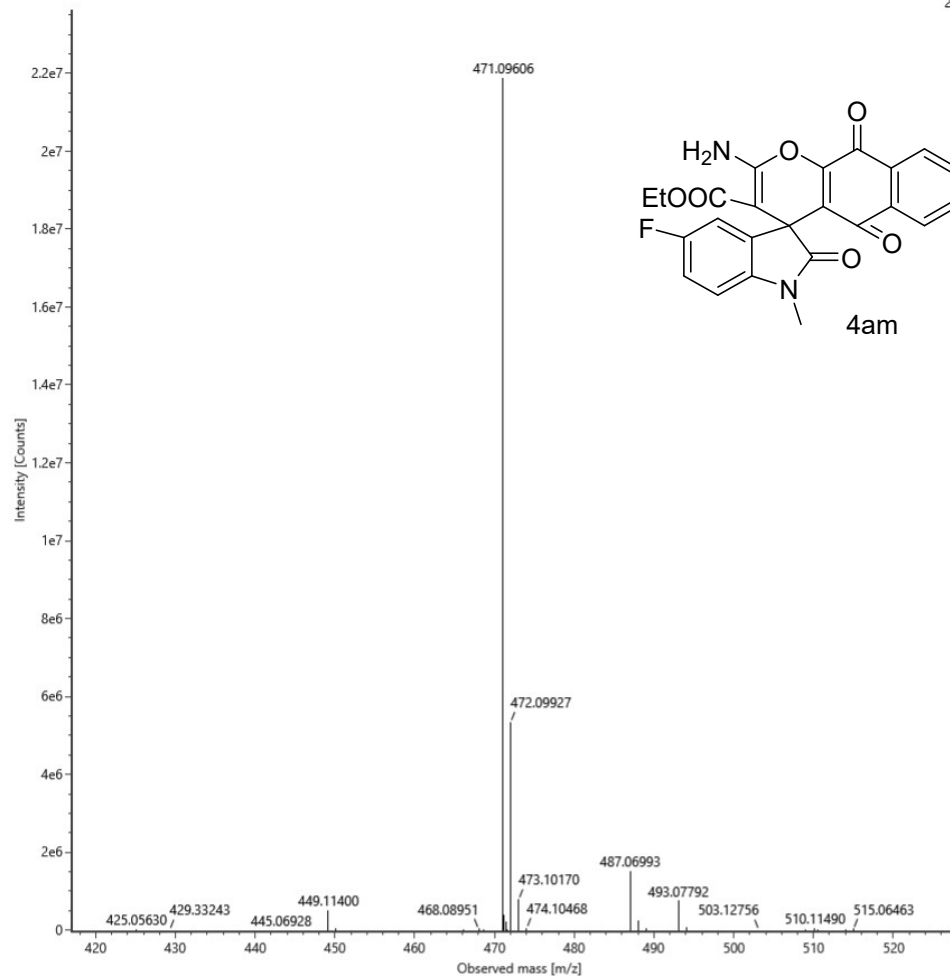

HRMS of Compound **4am**

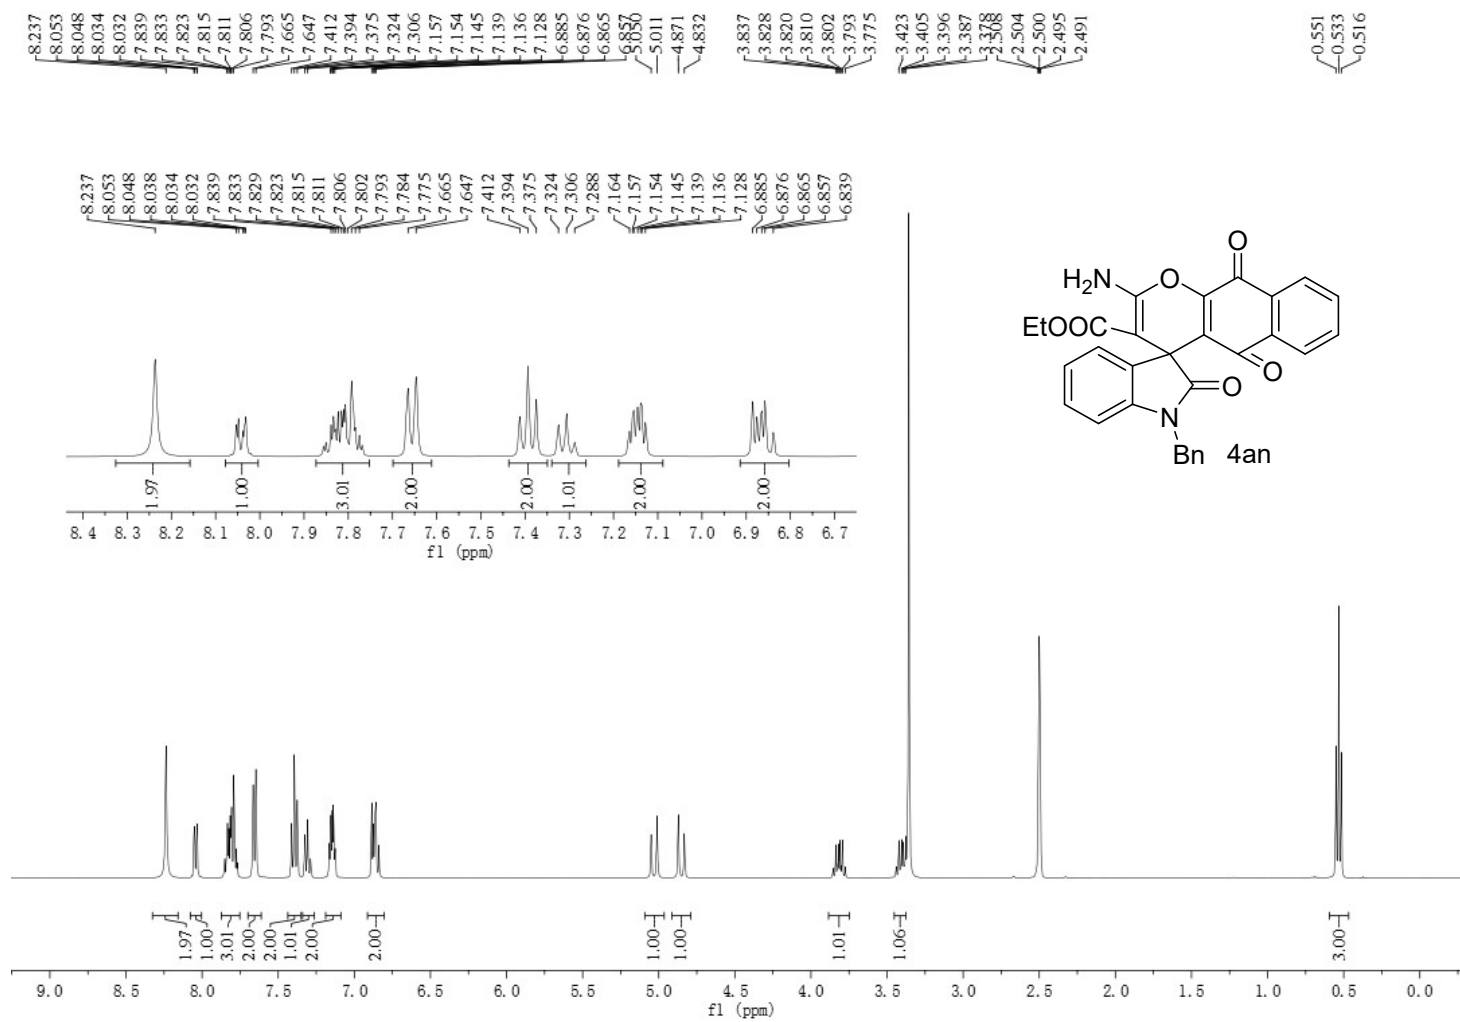

<sup>1</sup>H NMR of Compound **4an** (400 MHz, DMSO-*d*<sub>6</sub>)

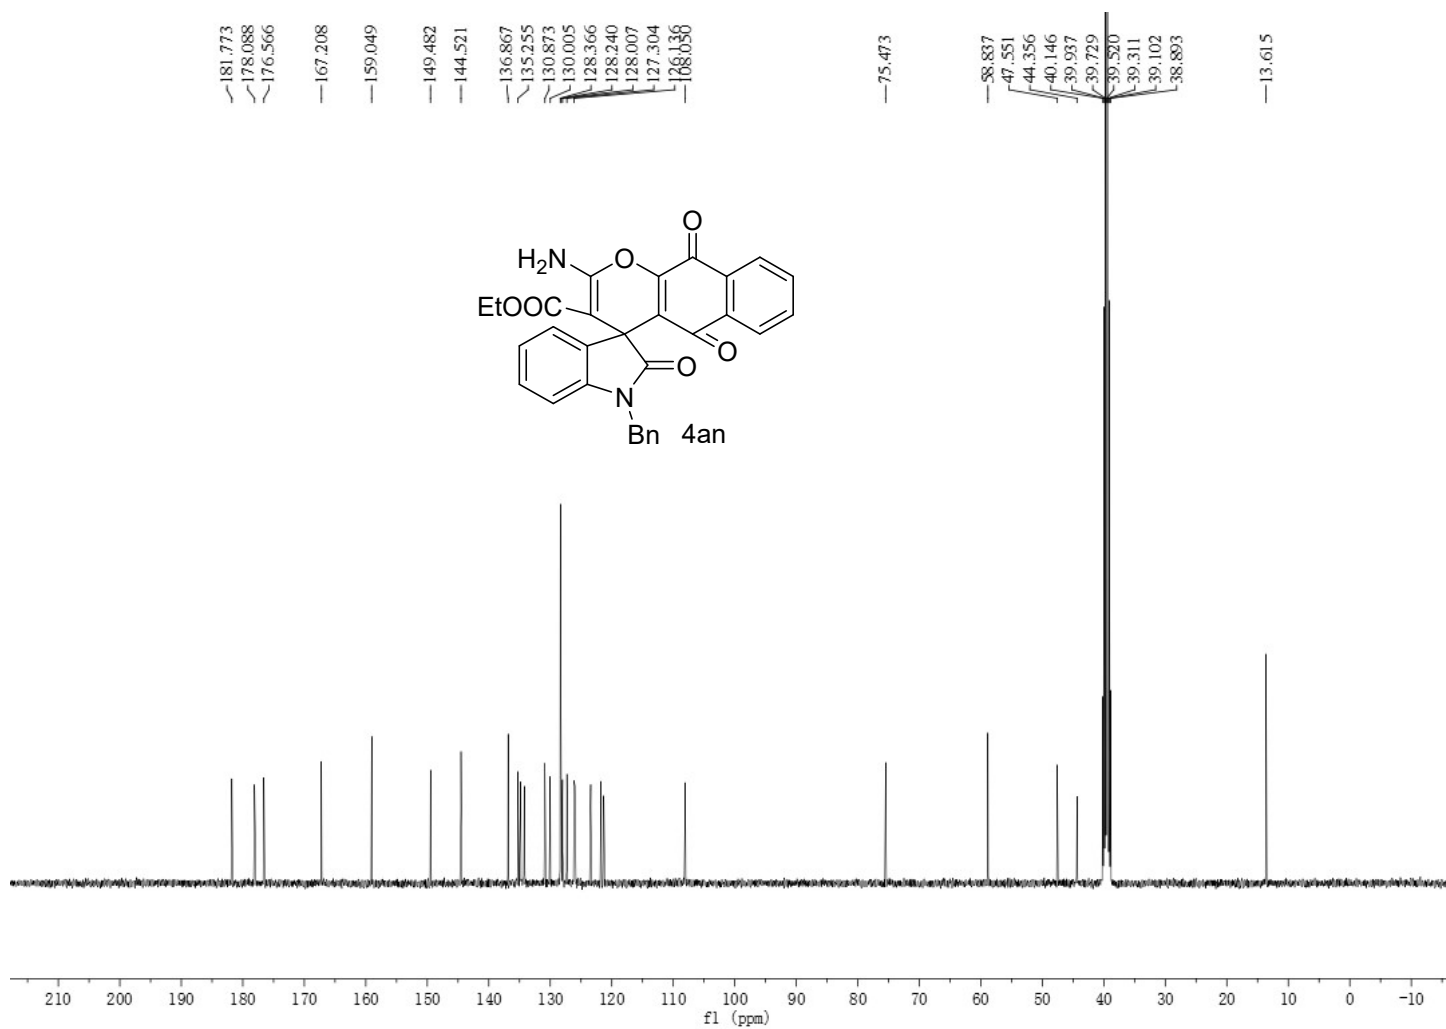

<sup>13</sup>C NMR of Compound **4an** (101 MHz, DMSO-*d*<sub>6</sub>)

Item name: Yes-22  
Item description:

Channel name: 1: Average Time 0.1377 min : TOF MS (50-1500) ESI+ : Centroided : Combined

3.02e7

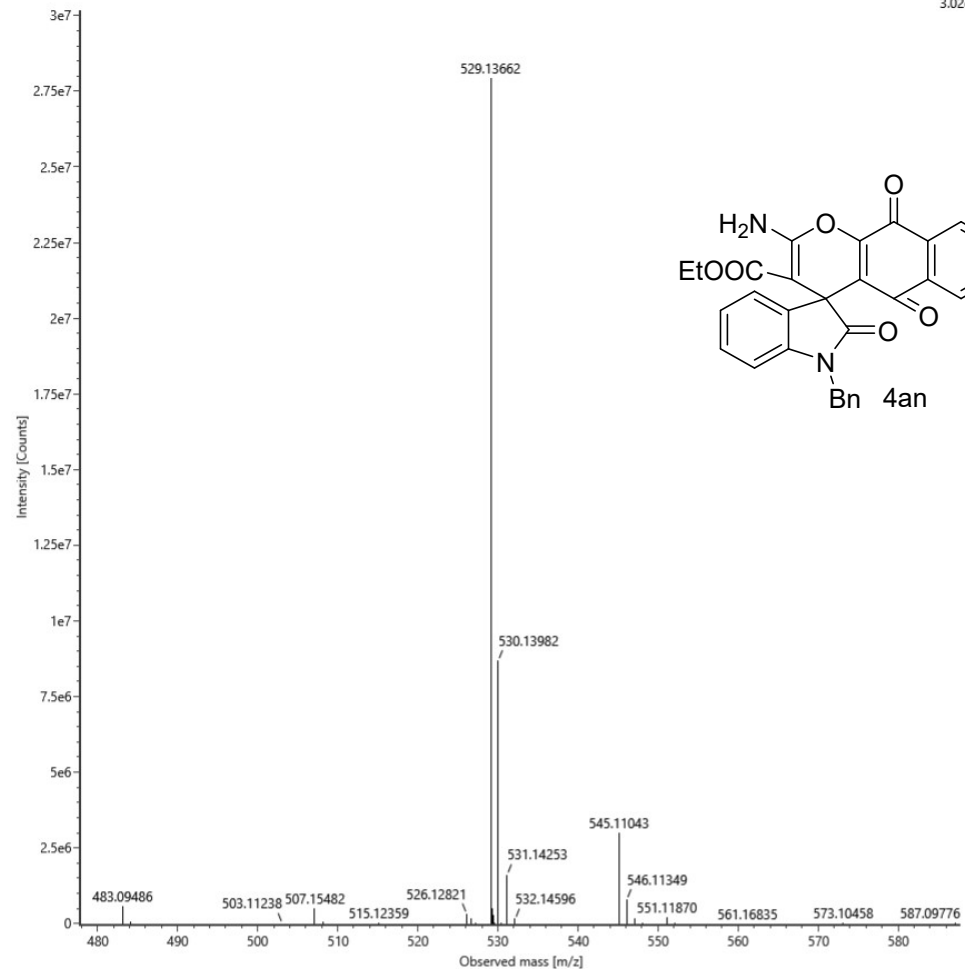

HRMS of Compound 4an

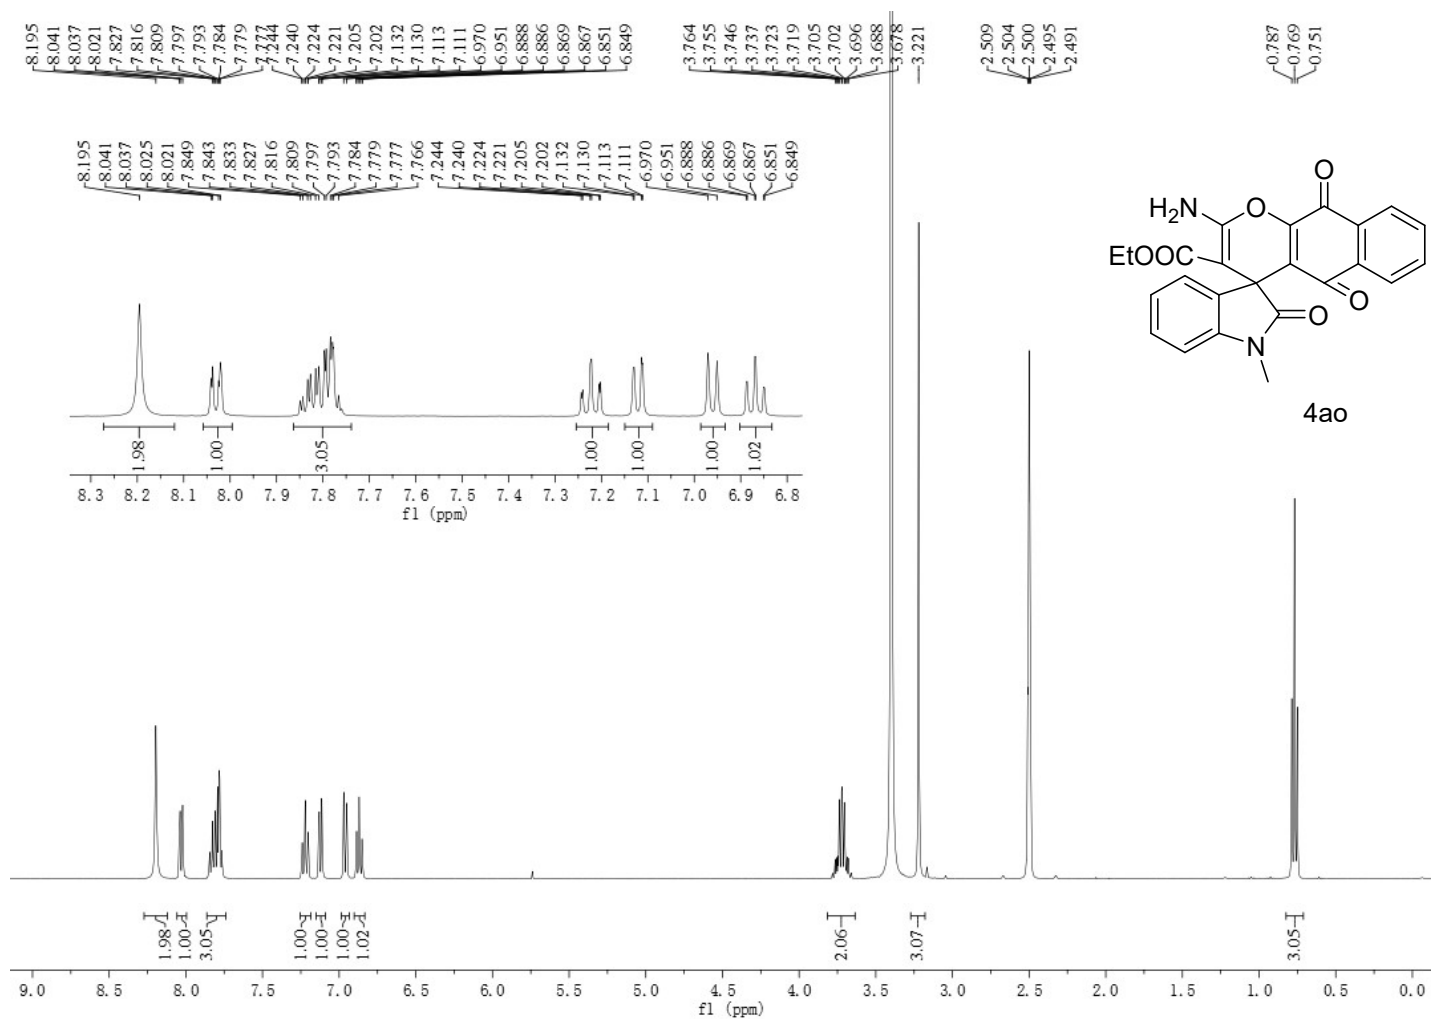

<sup>1</sup>H NMR of Compound **4ao** (400 MHz, DMSO-*d*<sub>6</sub>)

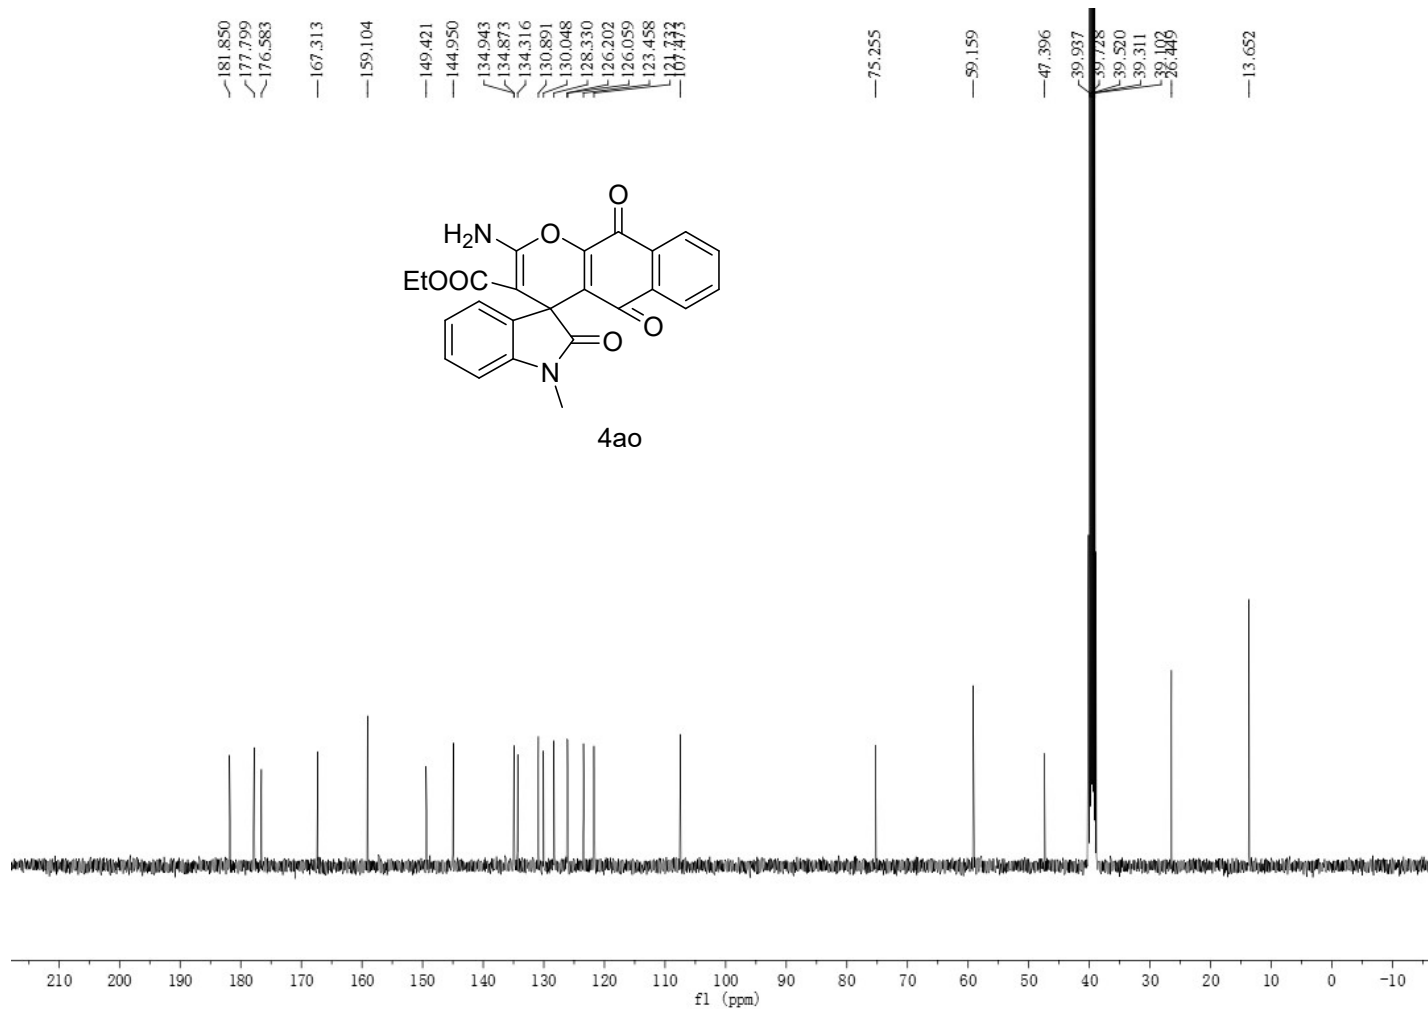

<sup>13</sup>C NMR of Compound **4ao** (101 MHz, DMSO-*d*<sub>6</sub>)

Item name: Yes-23  
Item description:

Channel name: 1: Average Time 0.1217 min : TOF MS (50-1500) ESI+ : Centroided : Combined

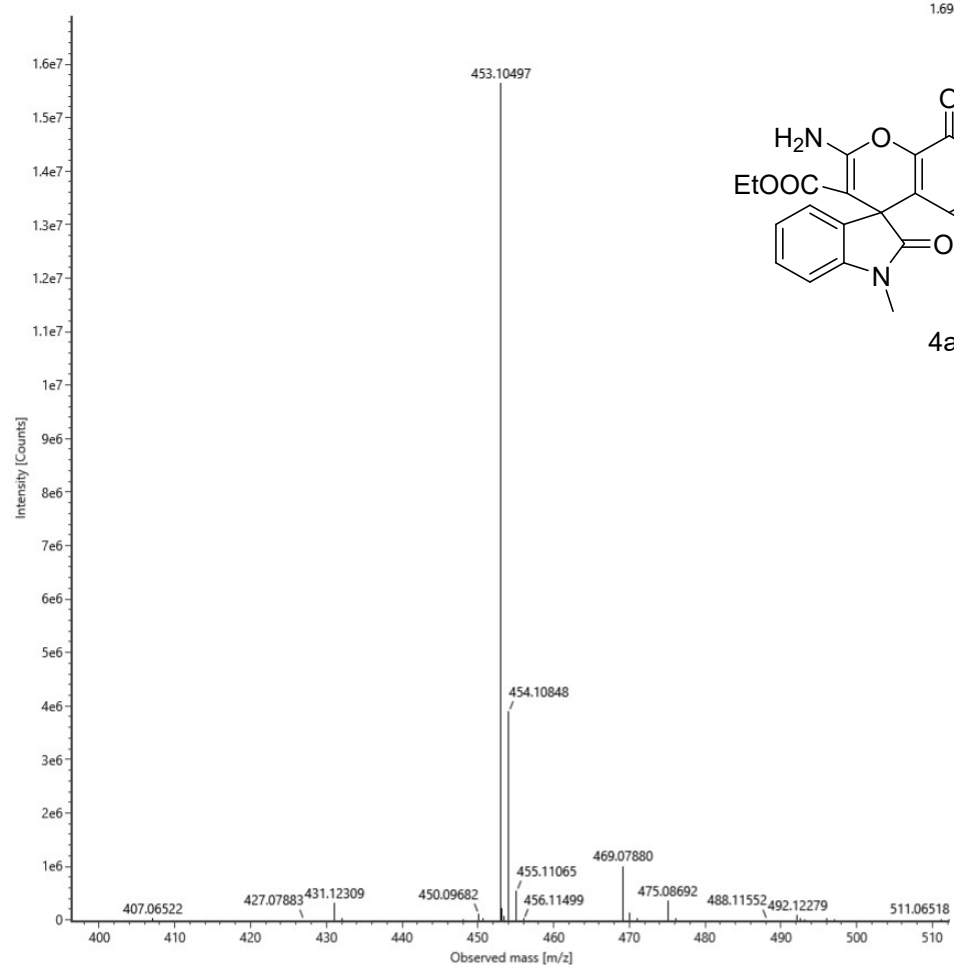

HRMS of Compound **4ao**



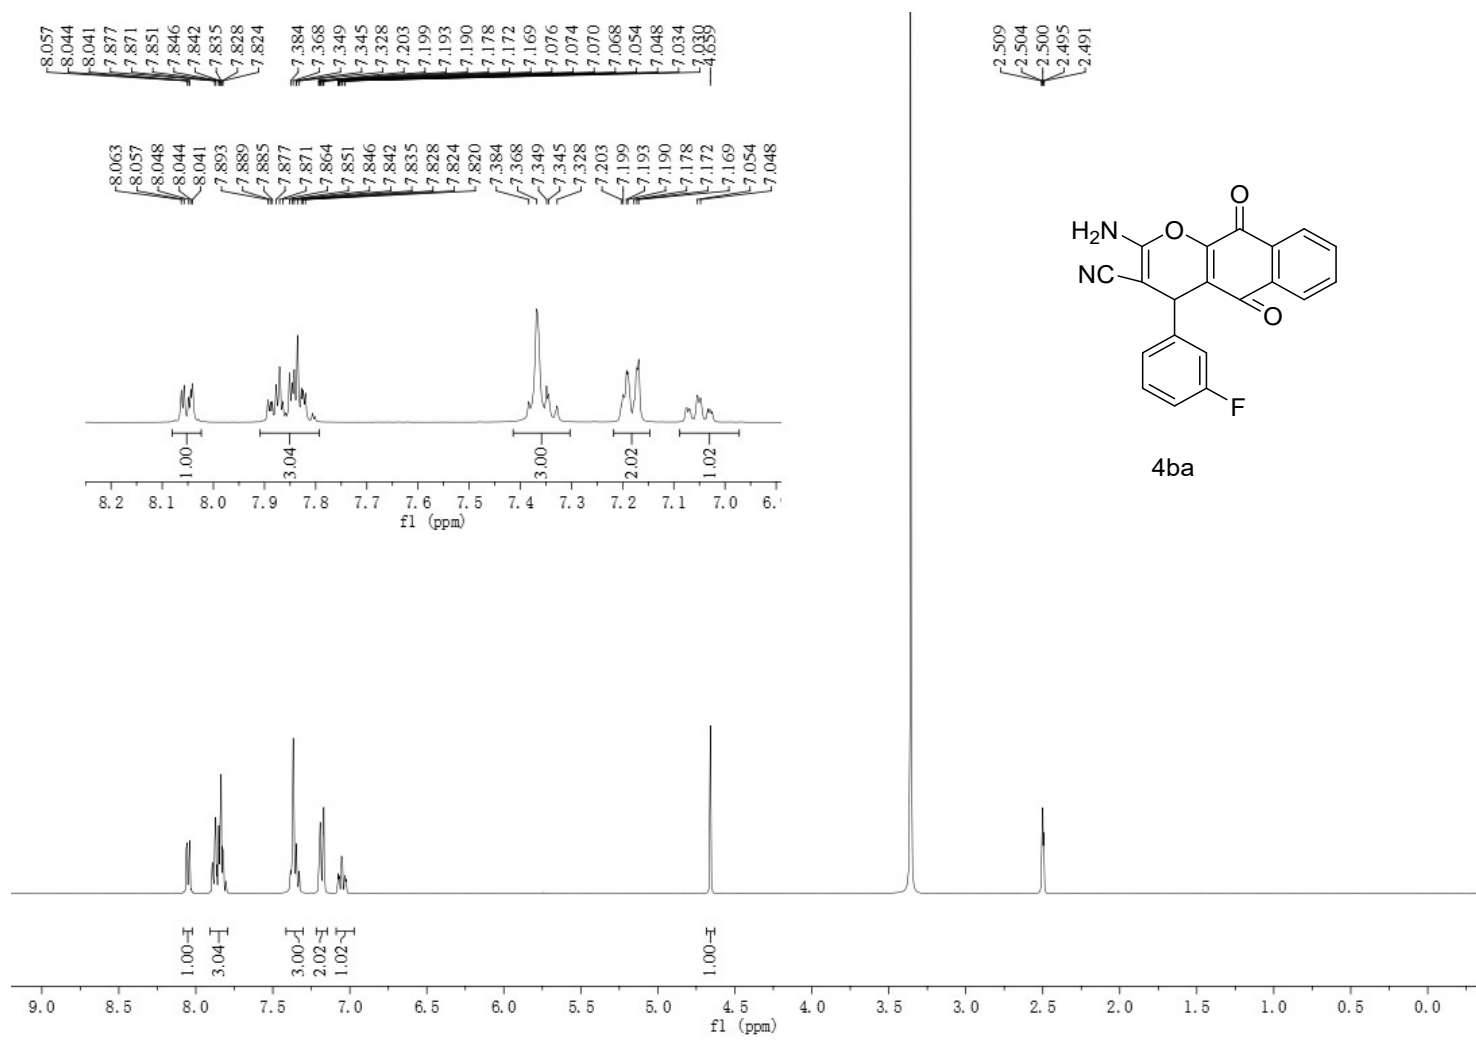

<sup>1</sup>H NMR of Compound **4ba** (400 MHz, DMSO-*d*<sub>6</sub>)

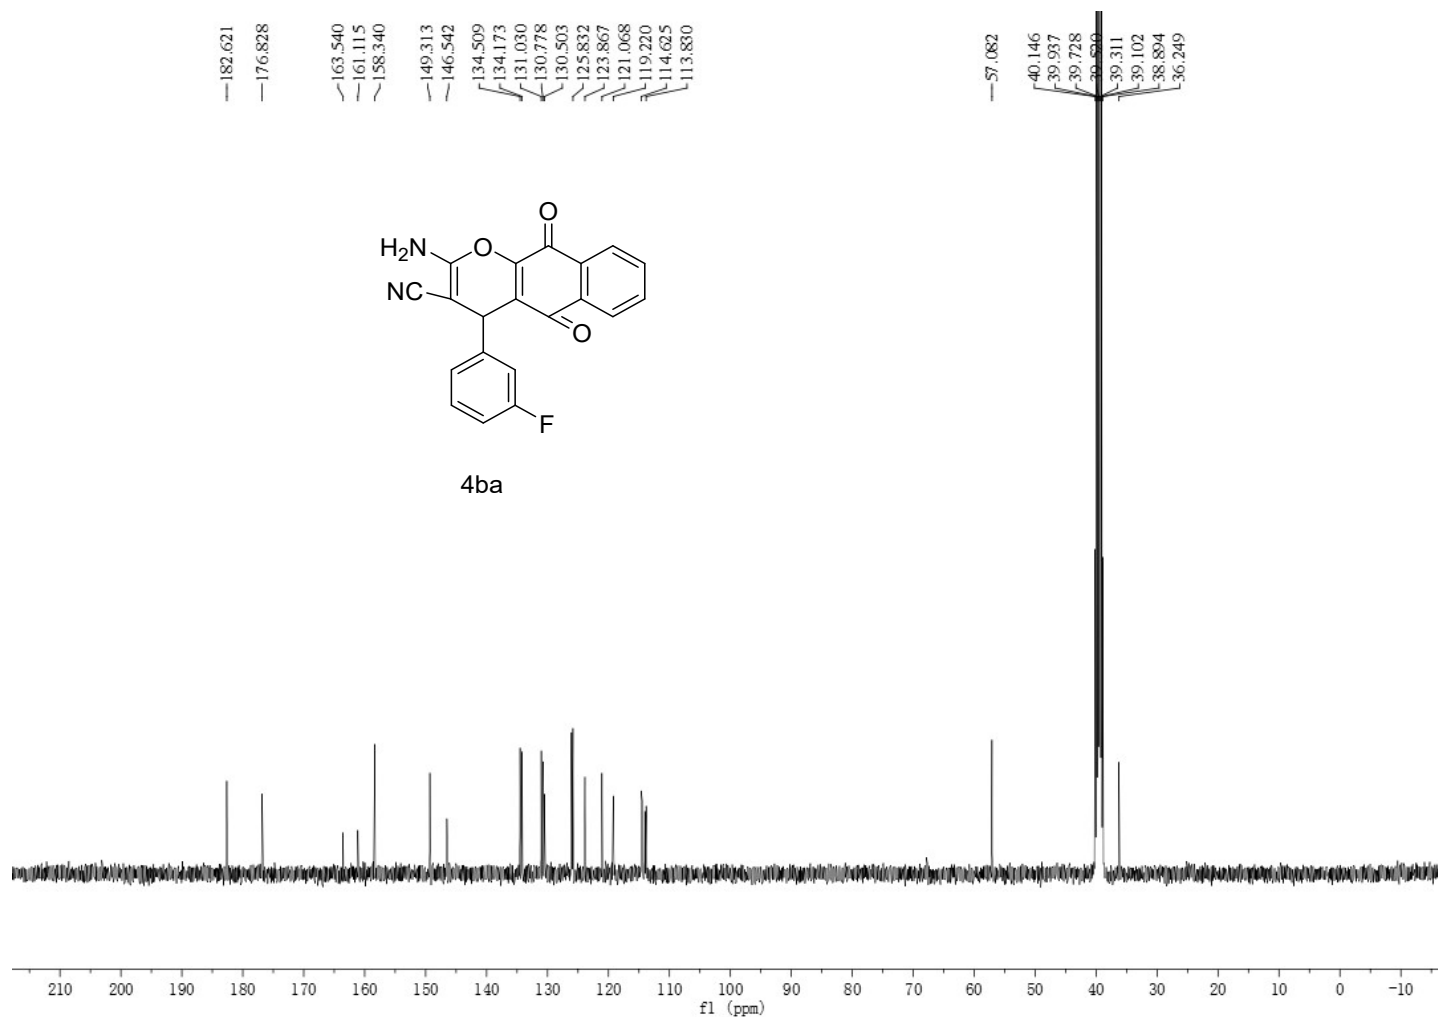

<sup>13</sup>C NMR of Compound **4ba** (101 MHz, DMSO-*d*<sub>6</sub>)

Item name: TAF-3  
Item description:

Channel name: 1: Average Time 0.1131 min : TOF MS (50-1500) ESI+ : Centroided : Combined

2.33e6

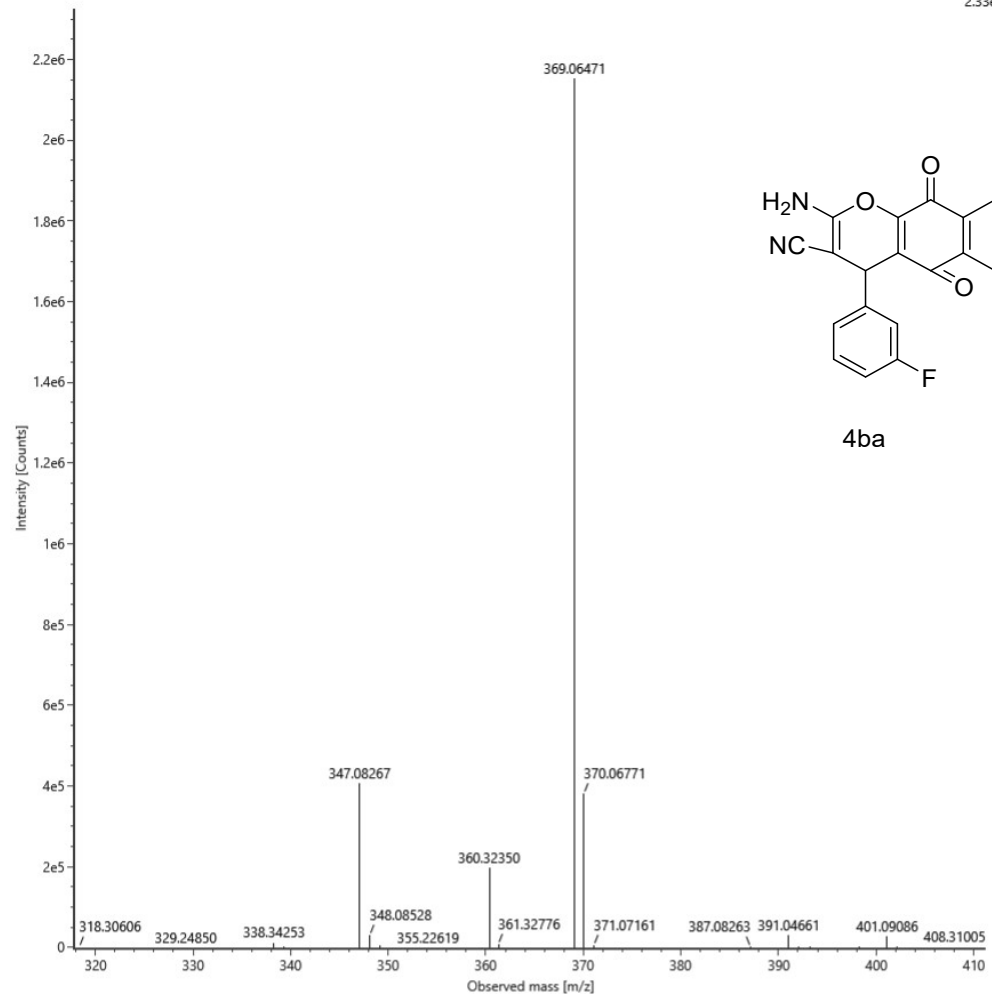

HRMS of Compound **4ba**

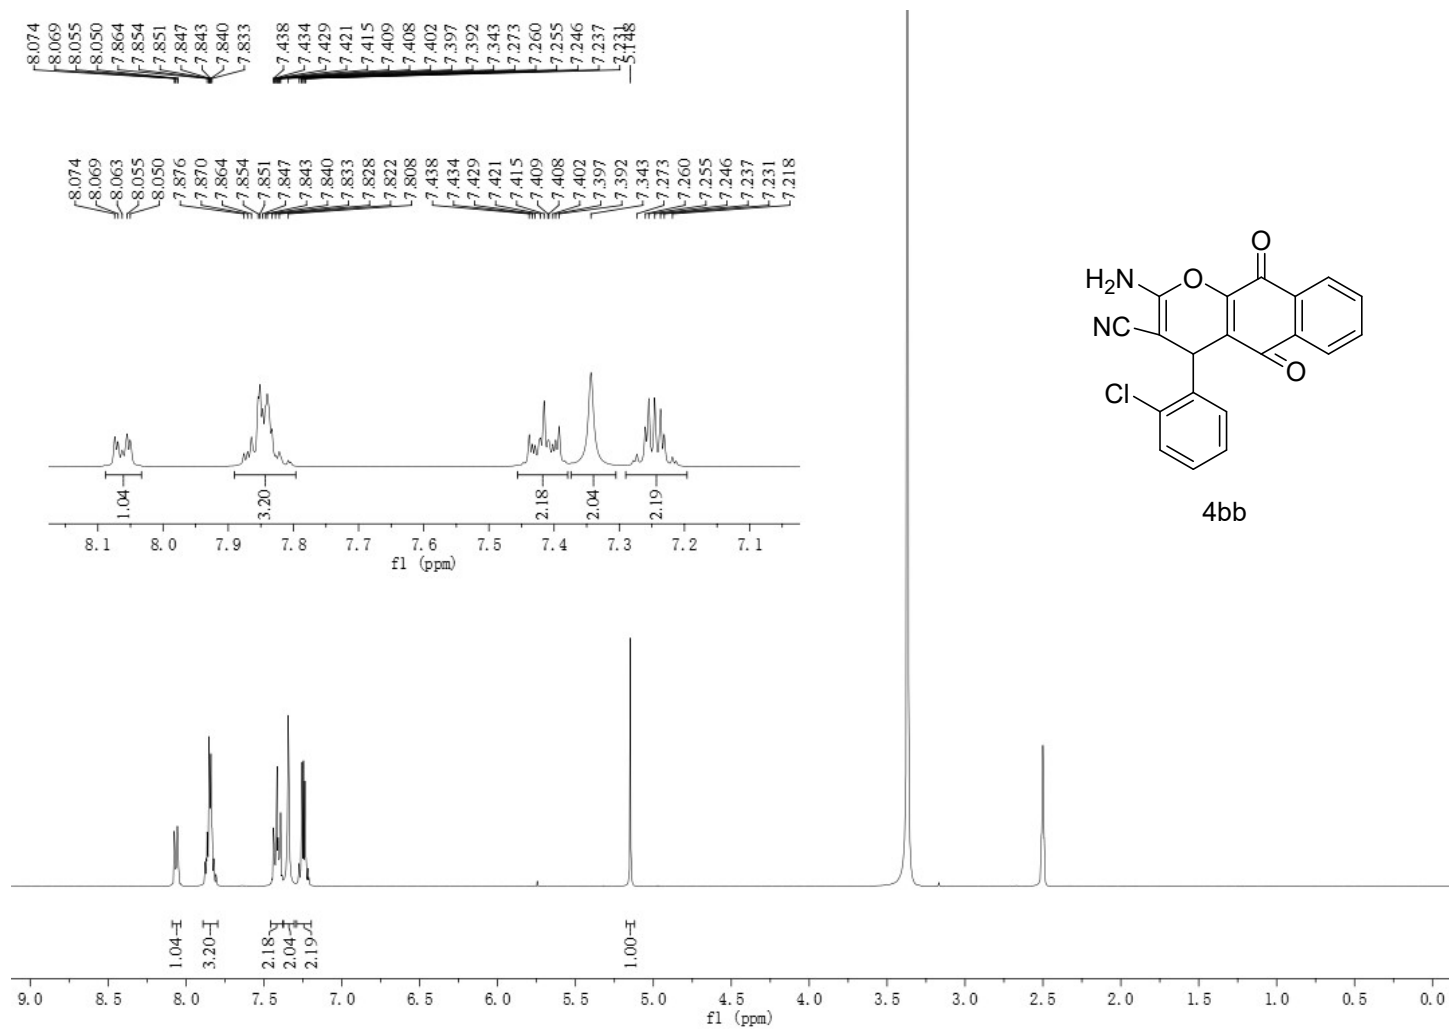

<sup>1</sup>H NMR of Compound **4bb** (400 MHz, DMSO-*d*<sub>6</sub>)

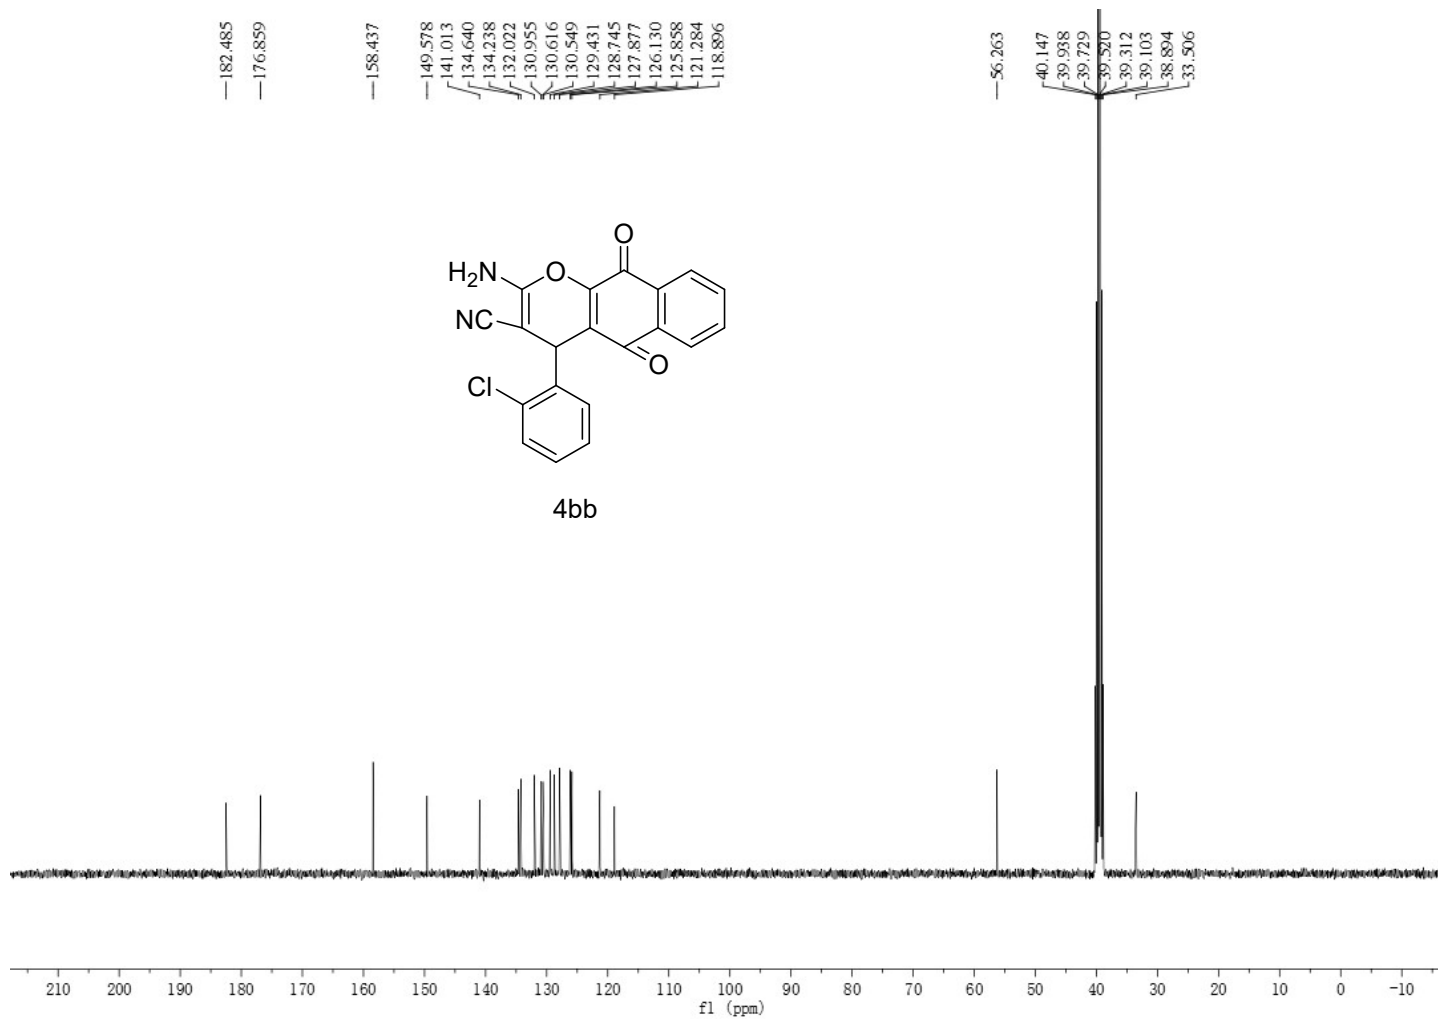

<sup>13</sup>C NMR of Compound **4bb** (101 MHz, DMSO-*d*<sub>6</sub>)

Item name: TAF-4  
Item description:

Channel name: 1: Average Time 0.1174 min : TOF MS (50-1500) ESI+ : Centroided : Combined

5.46e6

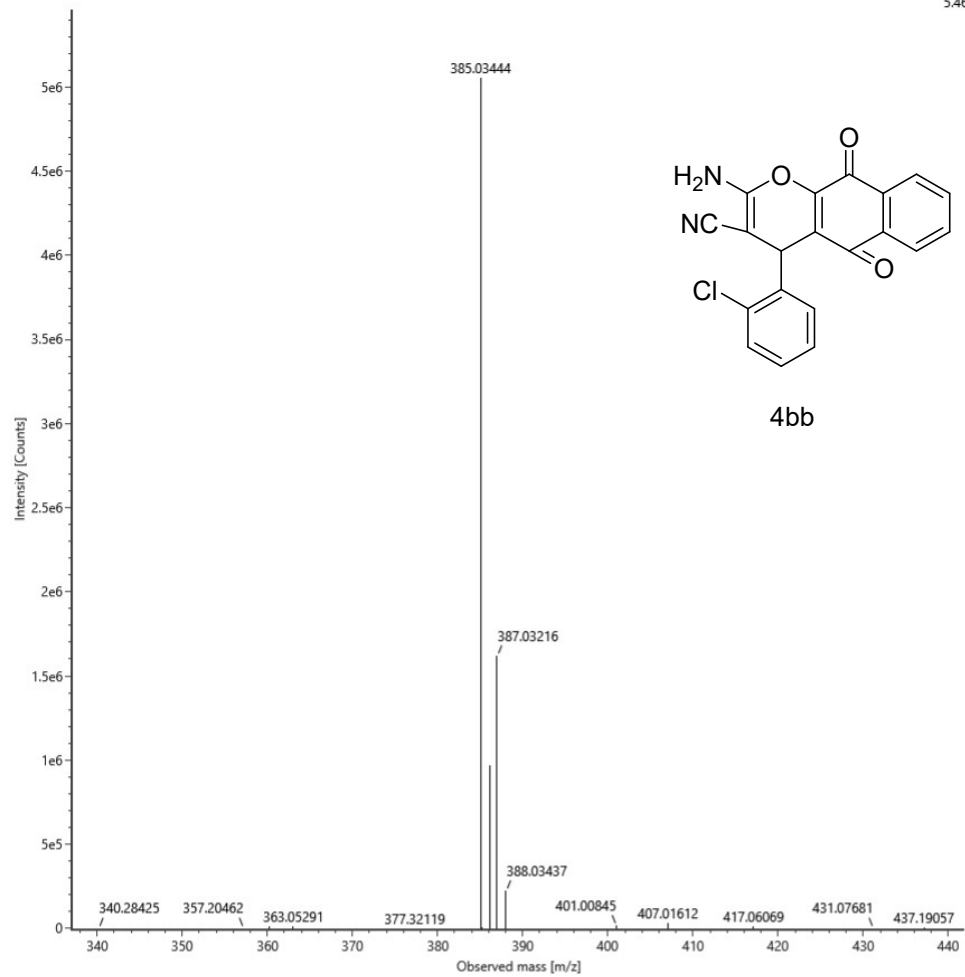

HRMS of Compound **4bb**

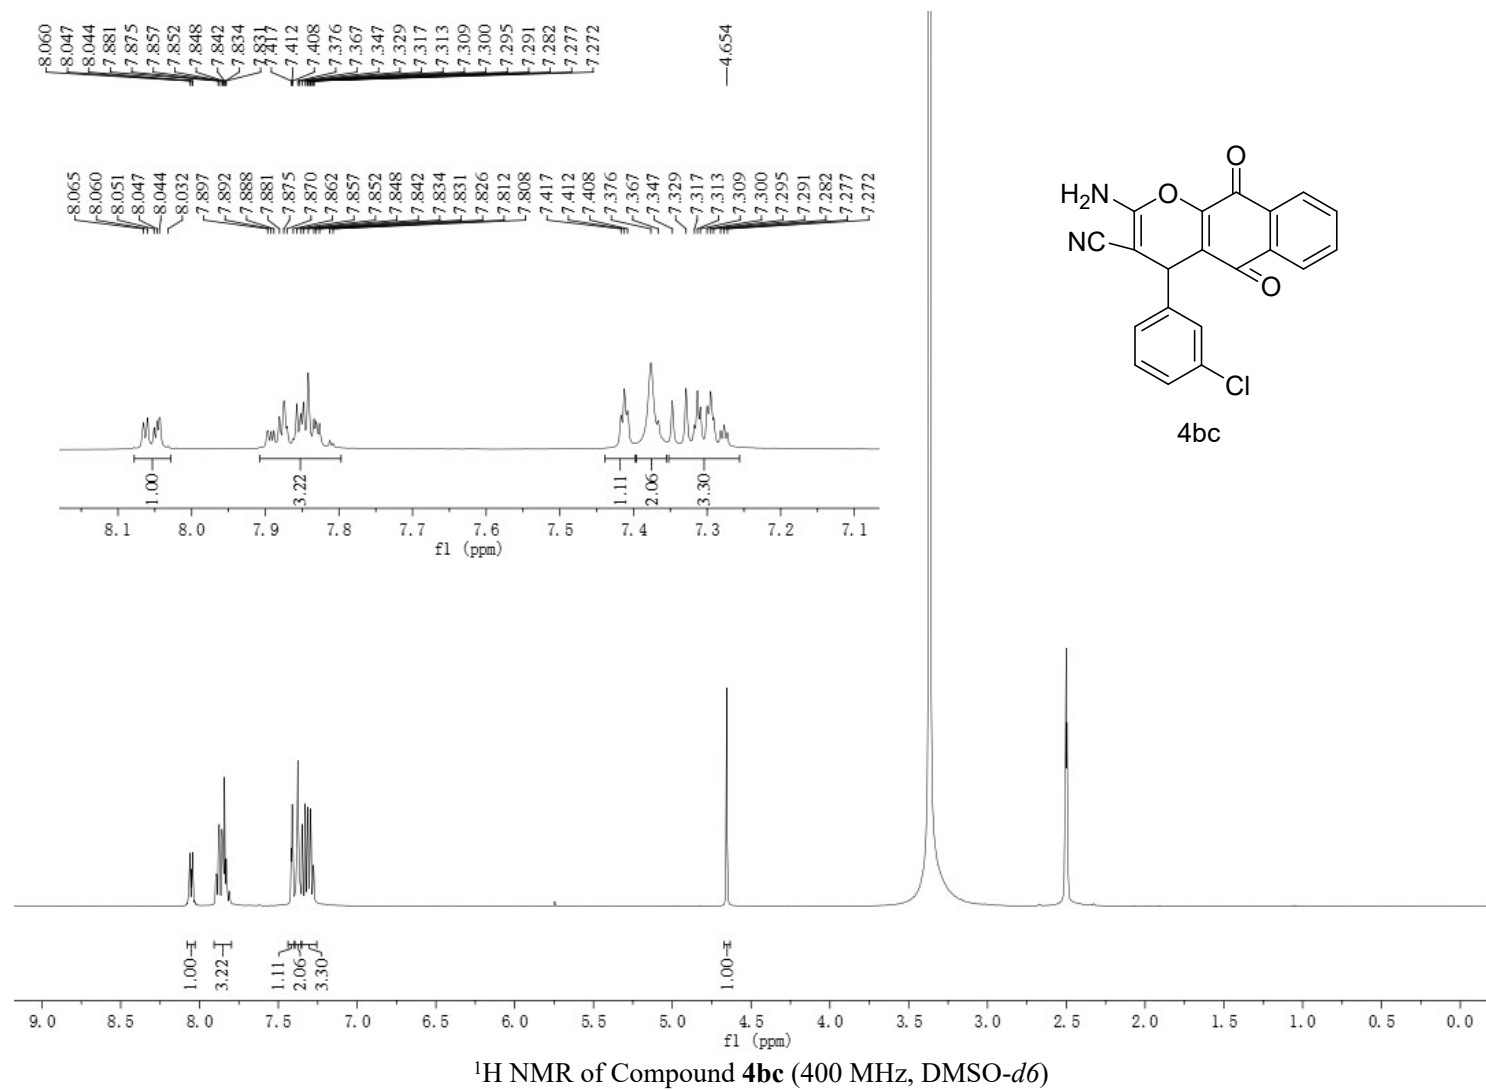

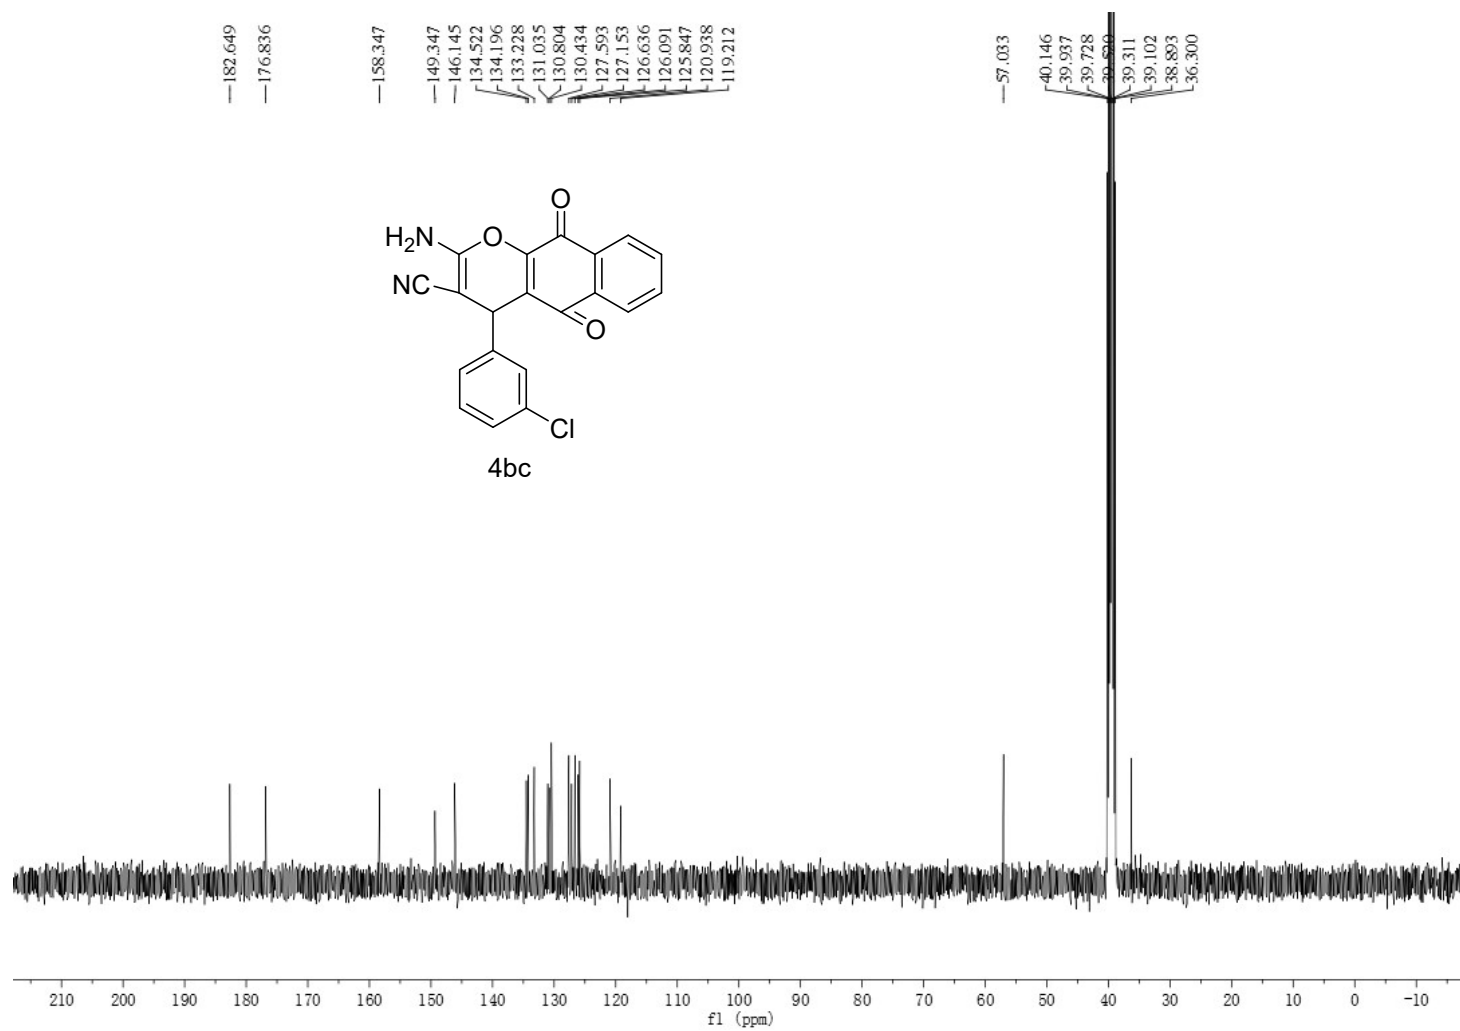

<sup>13</sup>C NMR of Compound **4bc** (101 MHz, DMSO-*d*<sub>6</sub>)



Item name: TAF-5  
Item description:

Channel name: 1: Average Time 0.1720 min : TOF MS (50-1500) ESI+ : Centroided : Combined

1.29e6

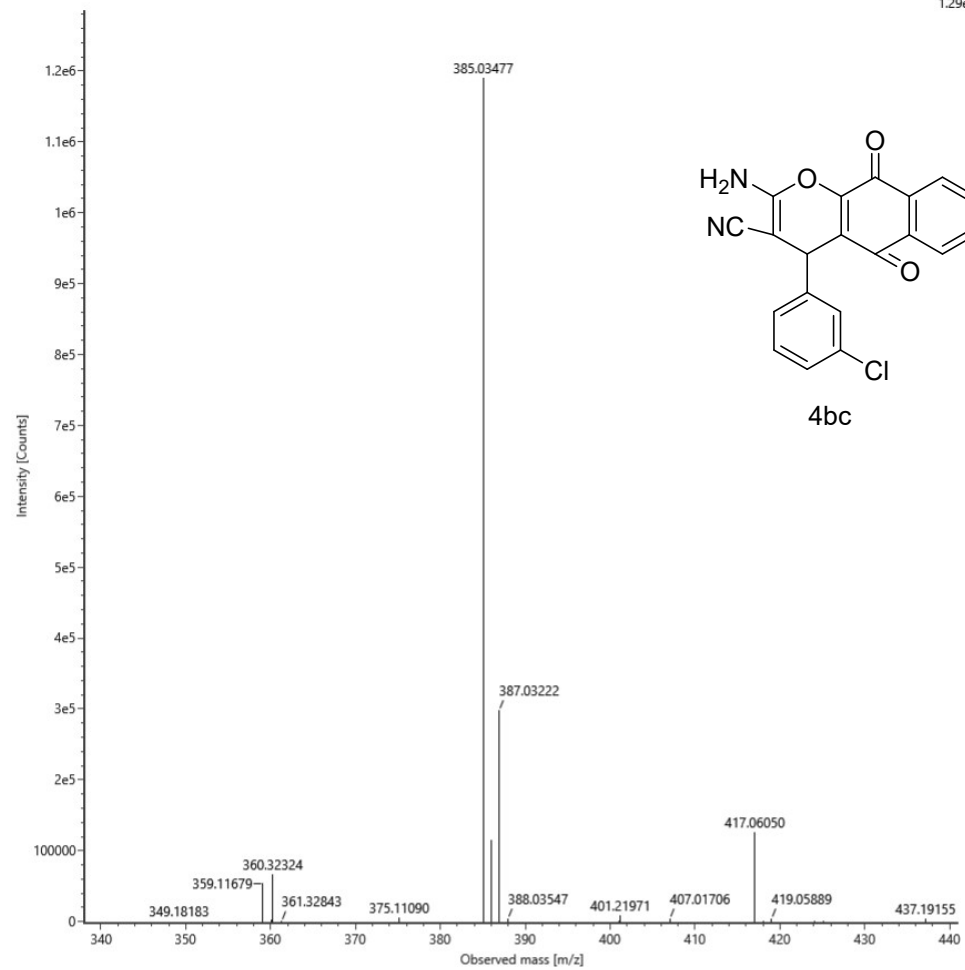

HRMS of Compound **4bc**

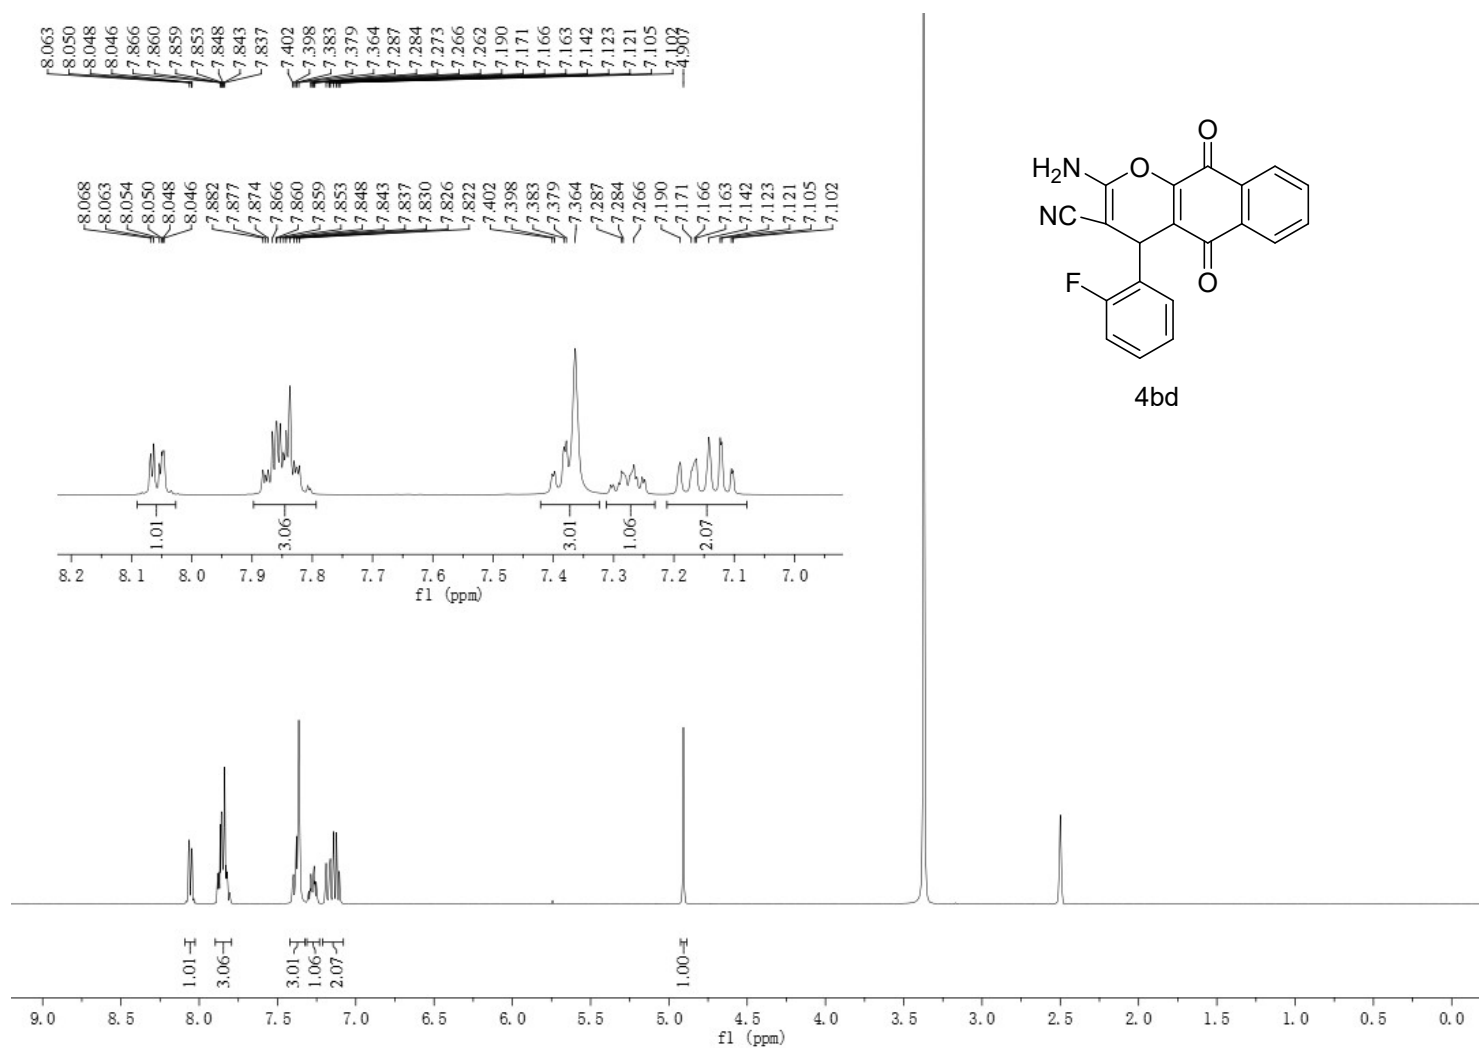

<sup>1</sup>H NMR of Compound **4bd** (400 MHz, DMSO-*d*<sub>6</sub>)

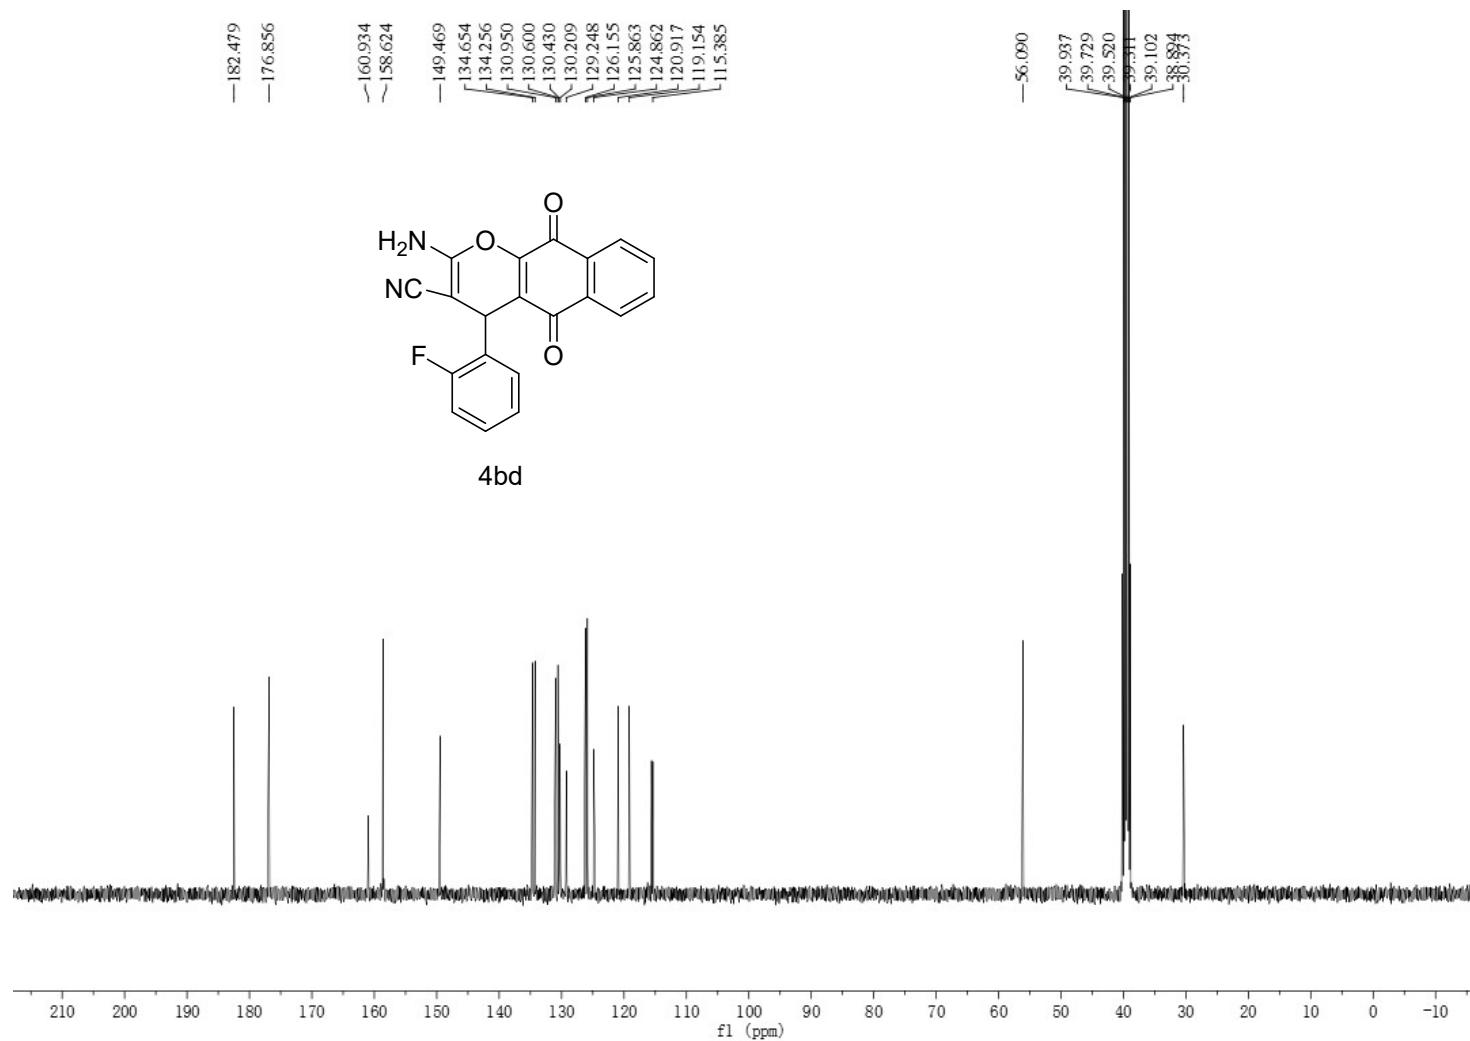

<sup>13</sup>C NMR of Compound **4bd** (101 MHz, DMSO-*d*<sub>6</sub>)

Item name: TAF-6  
Item description:

Channel name: 1: Average Time 0.1291 min : TOF MS (50-1500) ESI+ : Centroided : Combined

8.69e6

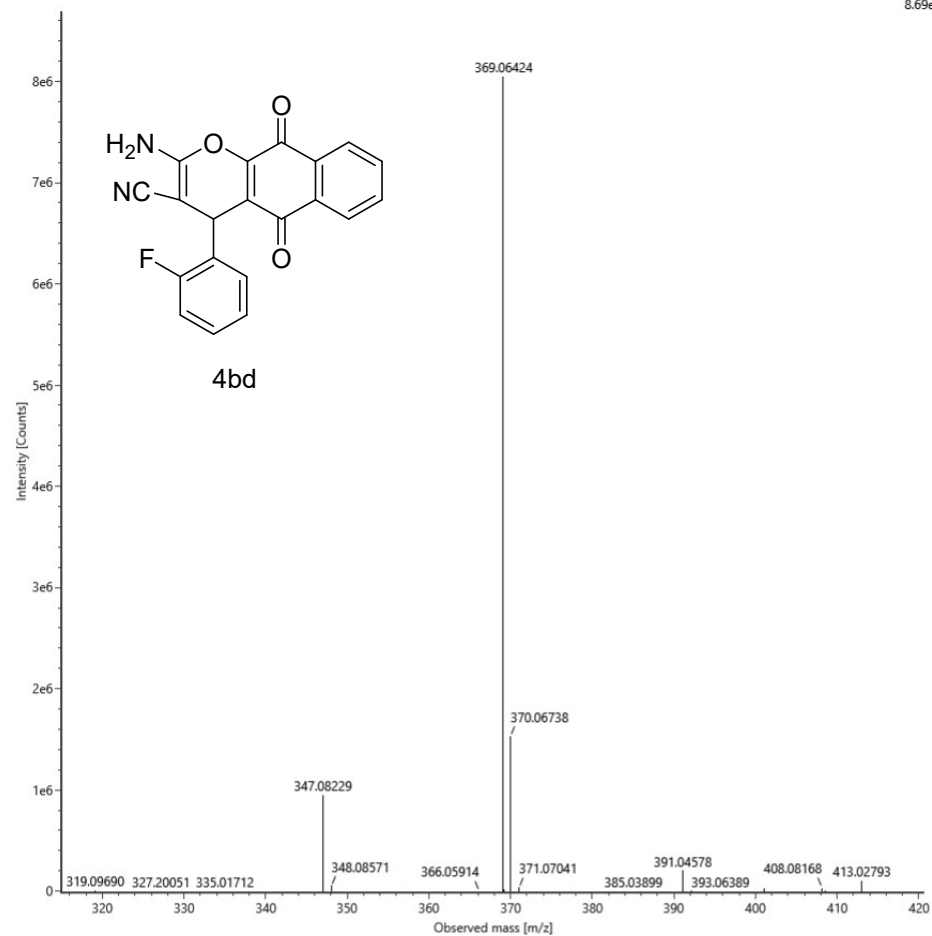

HRMS of Compound **4bd**

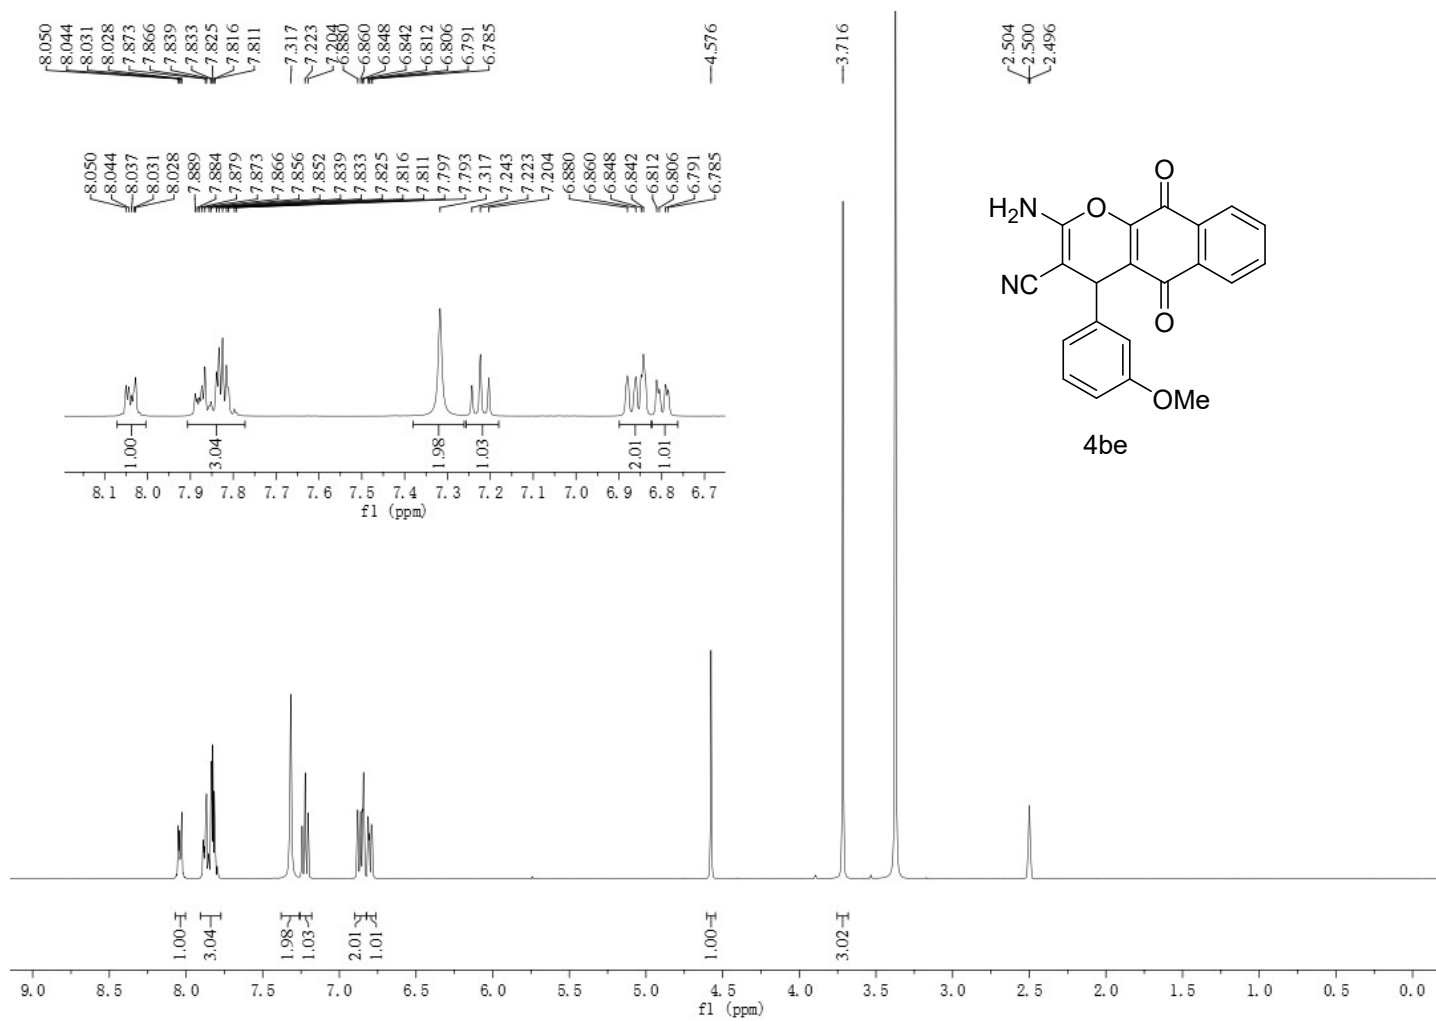

<sup>1</sup>H NMR of Compound **4be** (400 MHz, DMSO-*d*<sub>6</sub>)

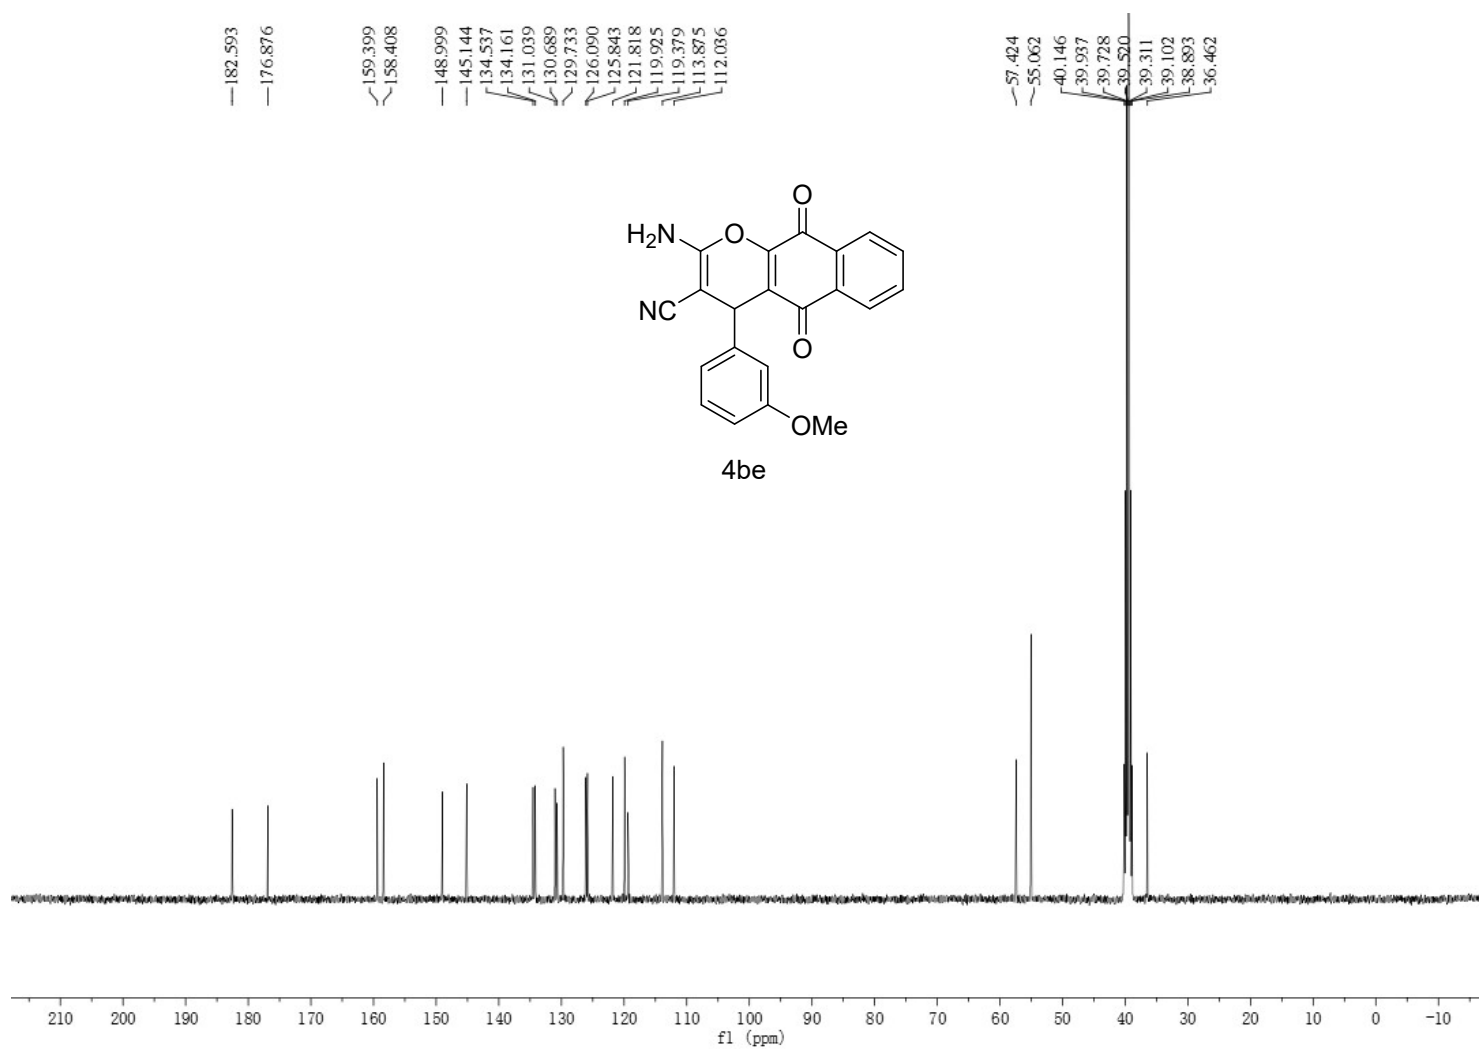

<sup>13</sup>C NMR of Compound **4be** (101 MHz, DMSO-*d*<sub>6</sub>)

Item name: TAF-7  
Item description:

Channel name: 1: Average Time 0.1174 min : TOF MS (50-1500) ESI+ : Centroided : Combined

1.93e7

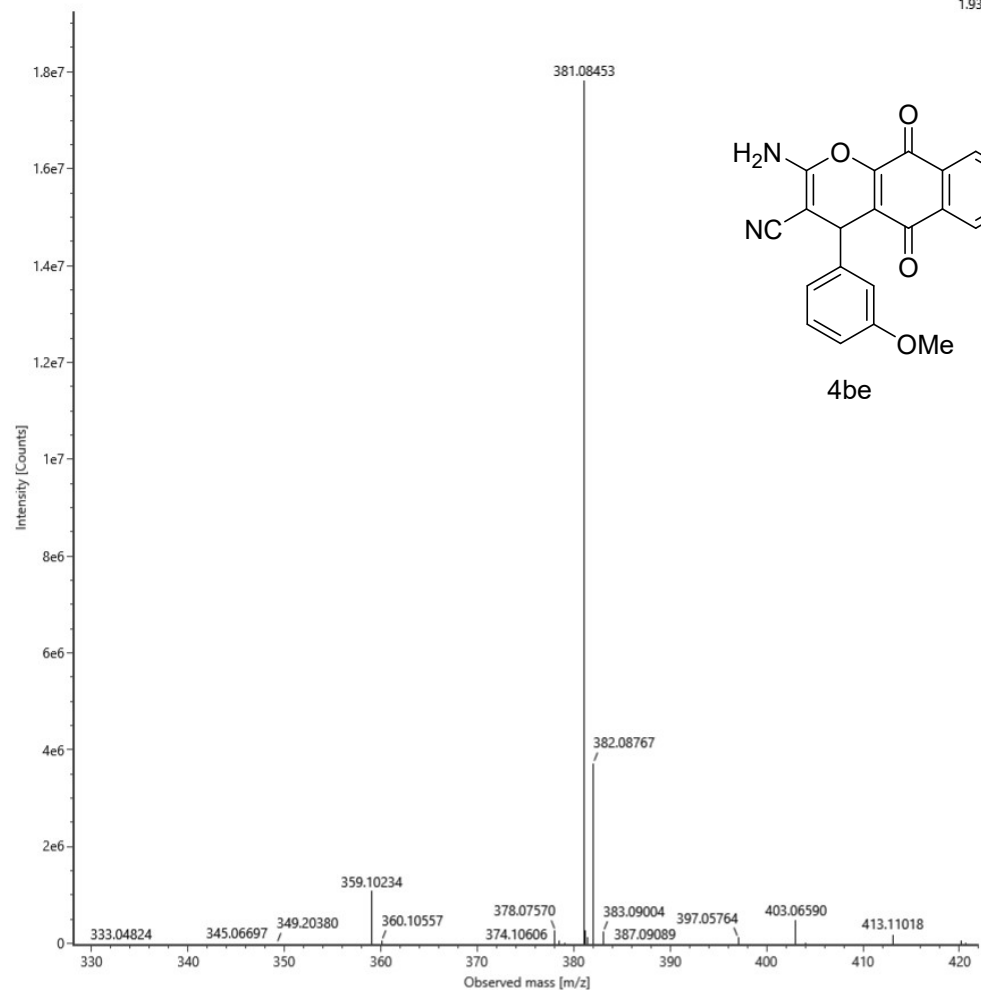

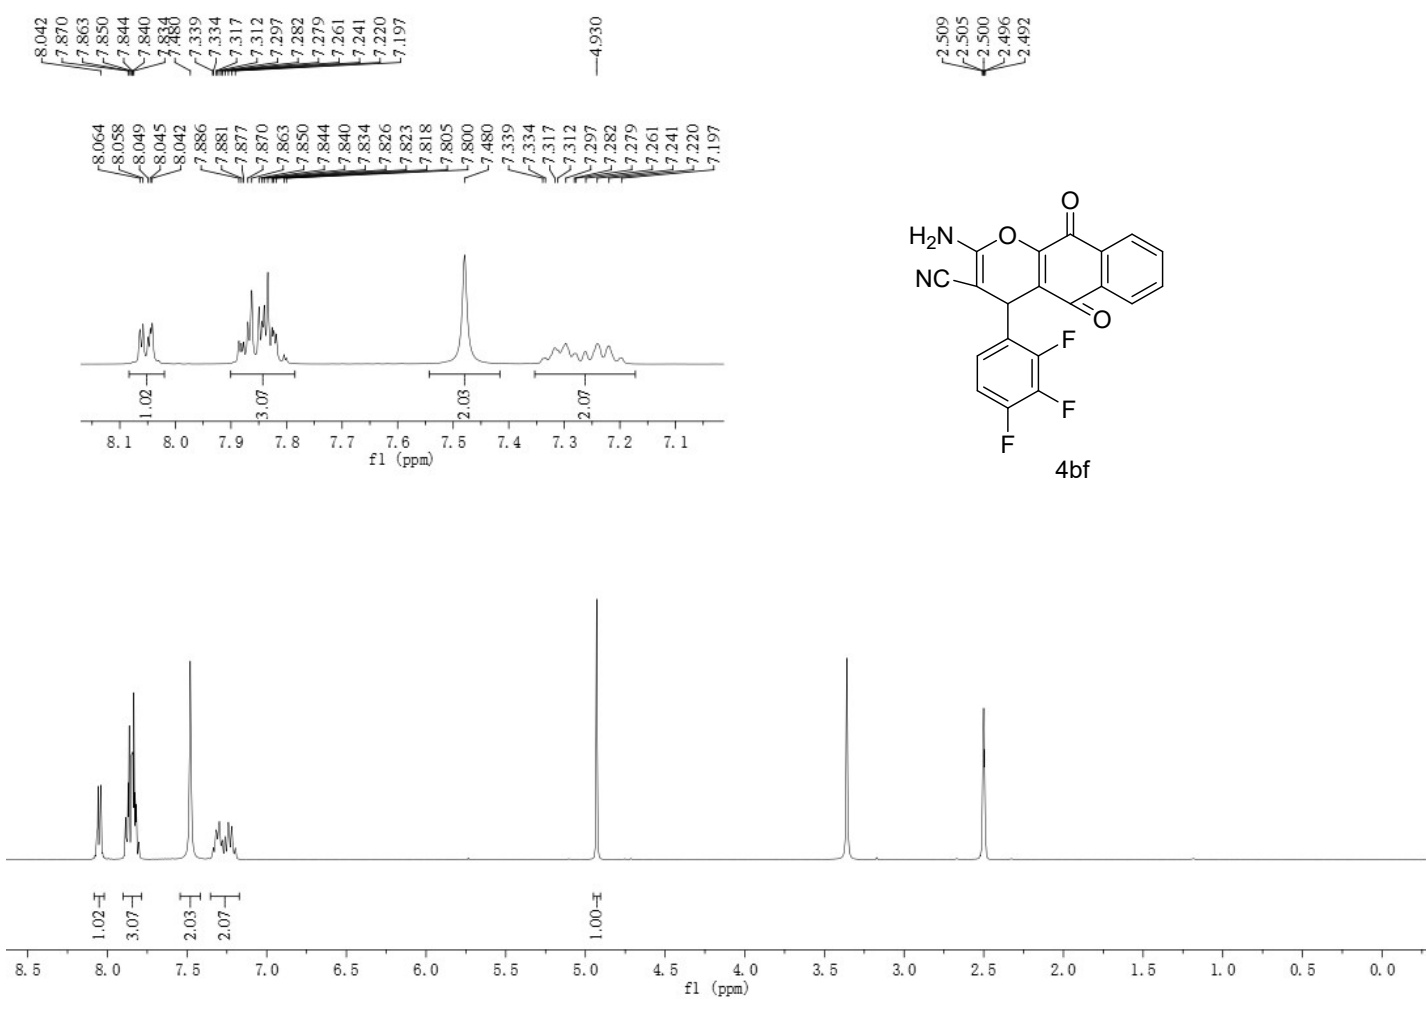

<sup>1</sup>H NMR of Compound **4bf** (400 MHz, DMSO-*d*<sub>6</sub>)



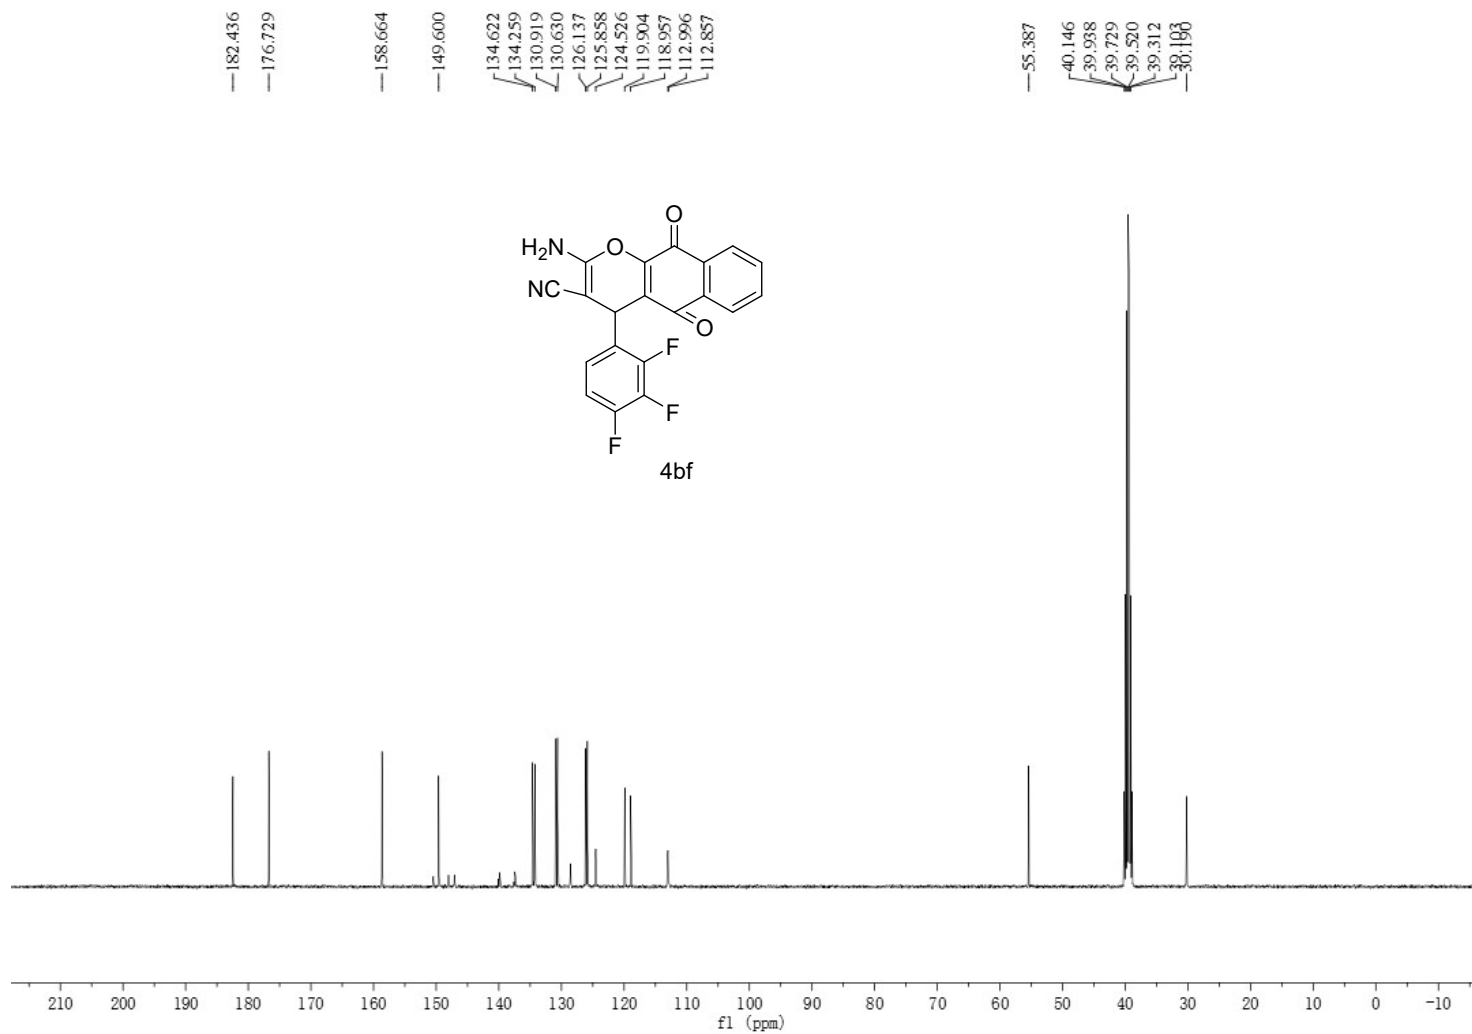

<sup>13</sup>C NMR of Compound **4bf** (101 MHz, DMSO-*d*<sub>6</sub>)

Item name: TAF-9  
Item description:

Channel name: 1: Average Time 0.1462 min : TOF MS (50-1500) ESI+ : Centroided : Combined

2.26e6

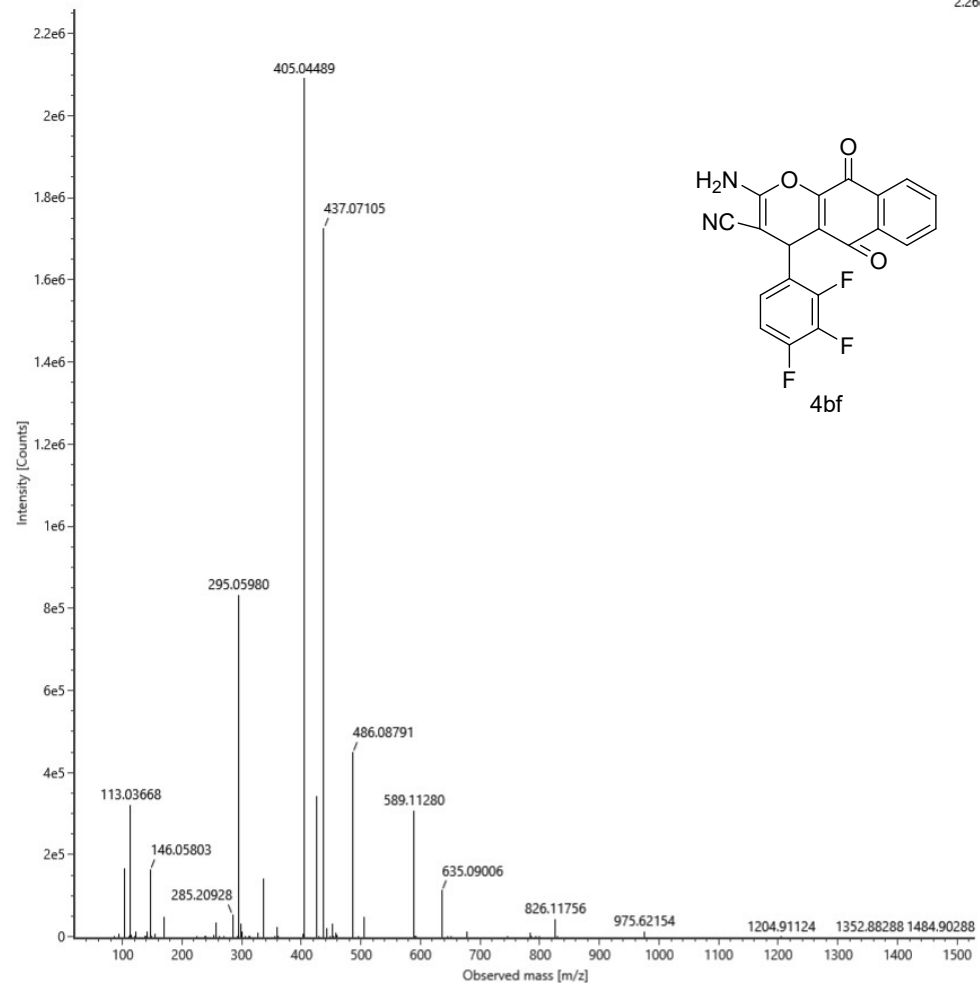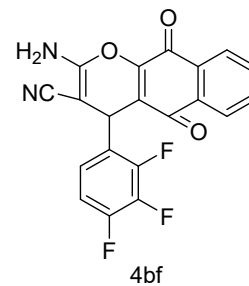

HRMS of Compound 4bf

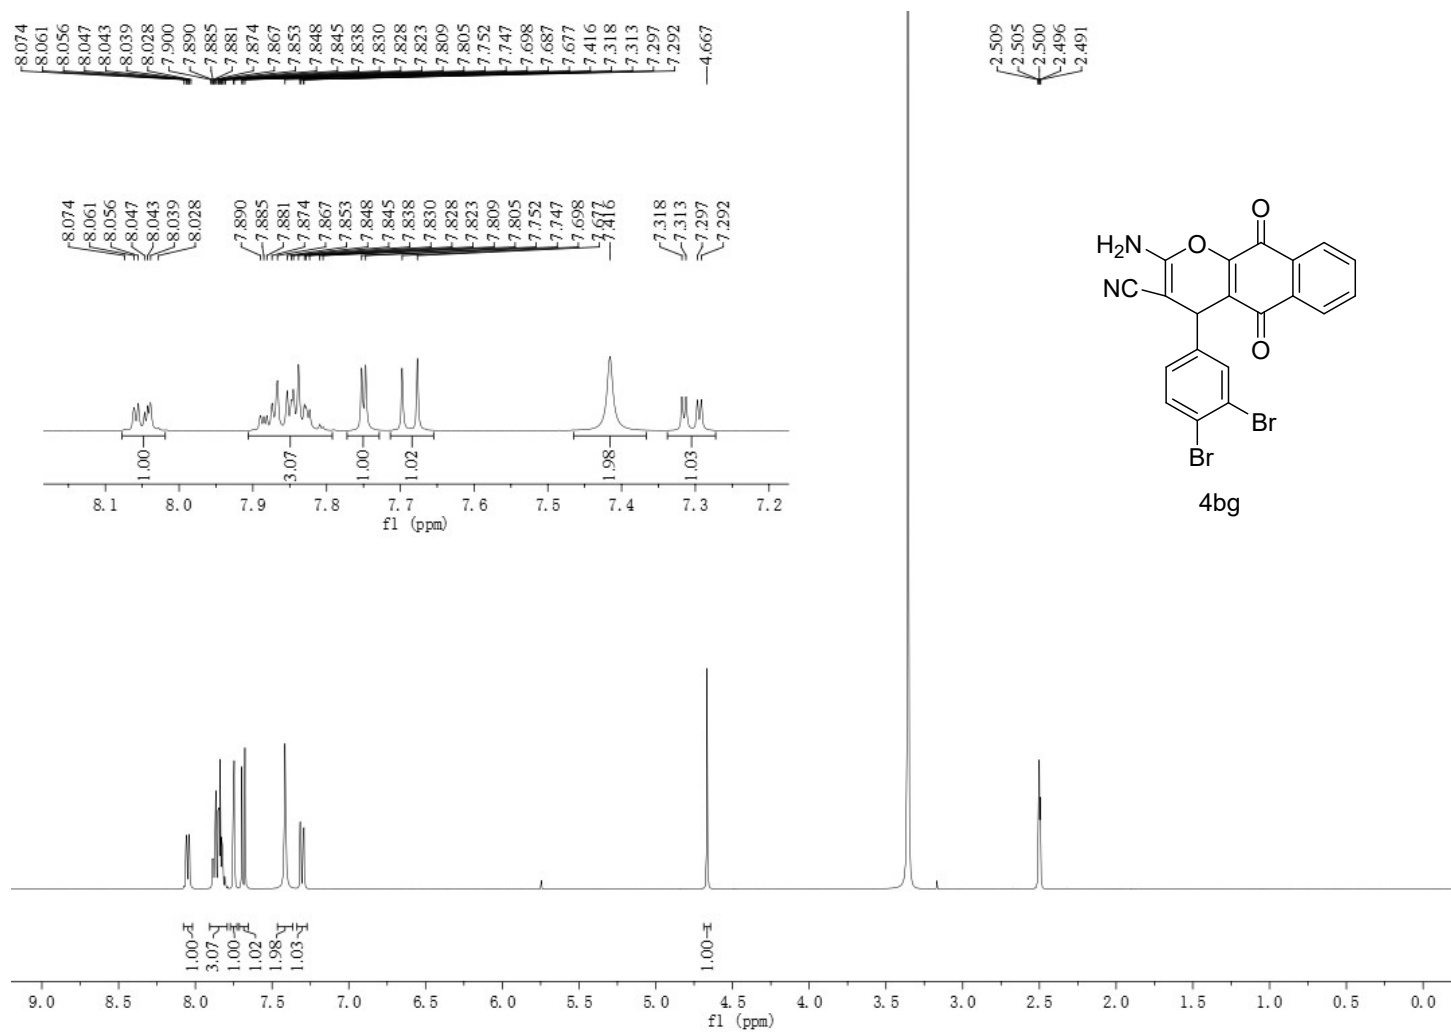

<sup>1</sup>H NMR of Compound **4bg** (400 MHz, DMSO-*d*<sub>6</sub>)

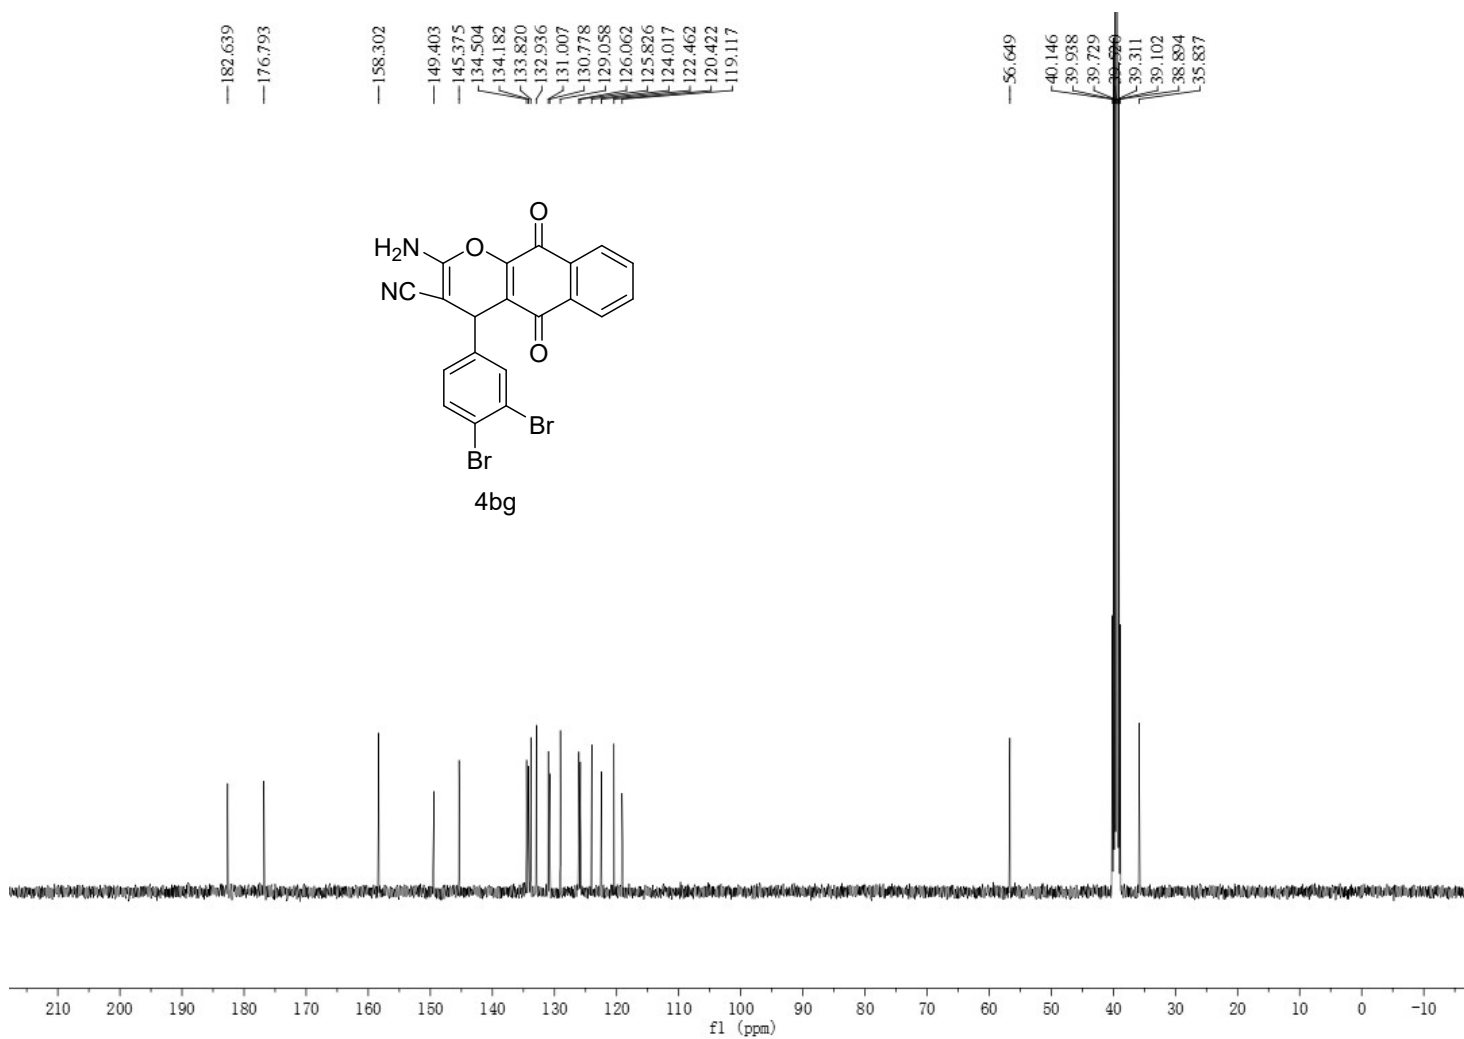

<sup>13</sup>C NMR of Compound **4bg** (101 MHz, DMSO-*d*<sub>6</sub>)

Item name: TAF-11  
Item description:

Channel name: 1: Average Time 0.1217 min : TOF MS (50-1500) ESI+ : Centroided : Combined

1.53e6

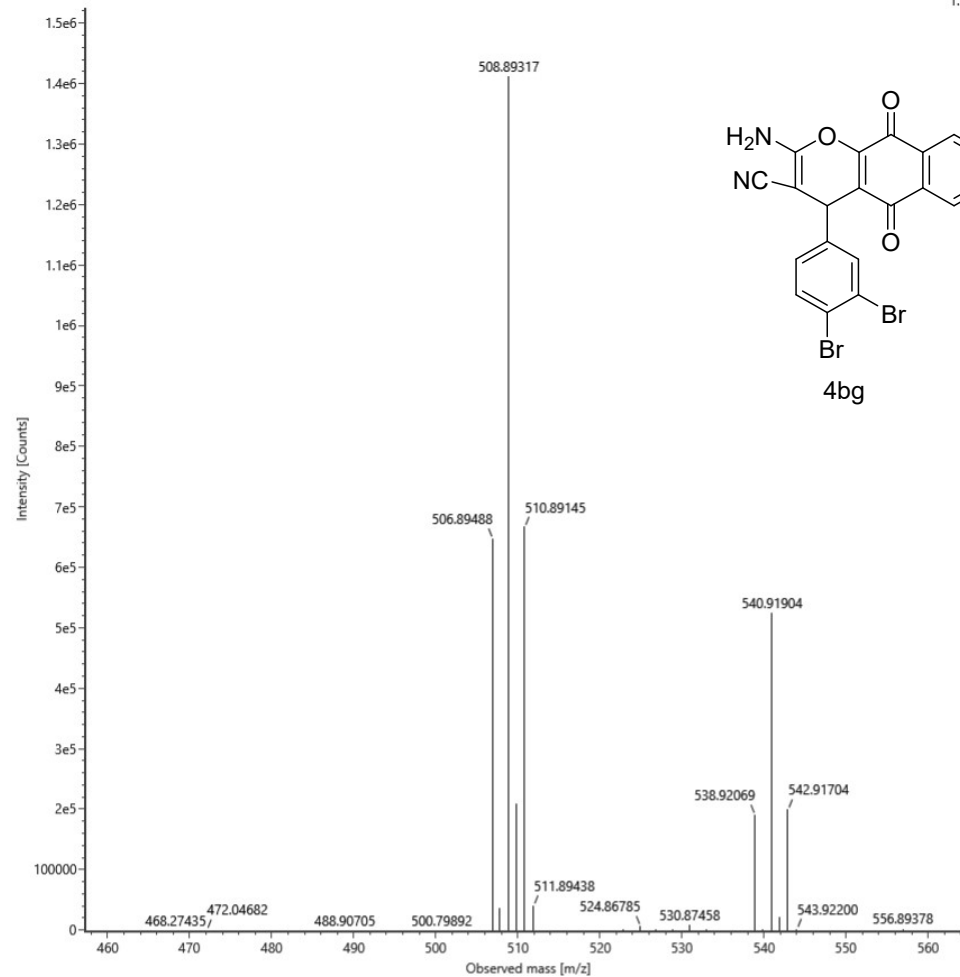

HRMS of Compound **4bg**

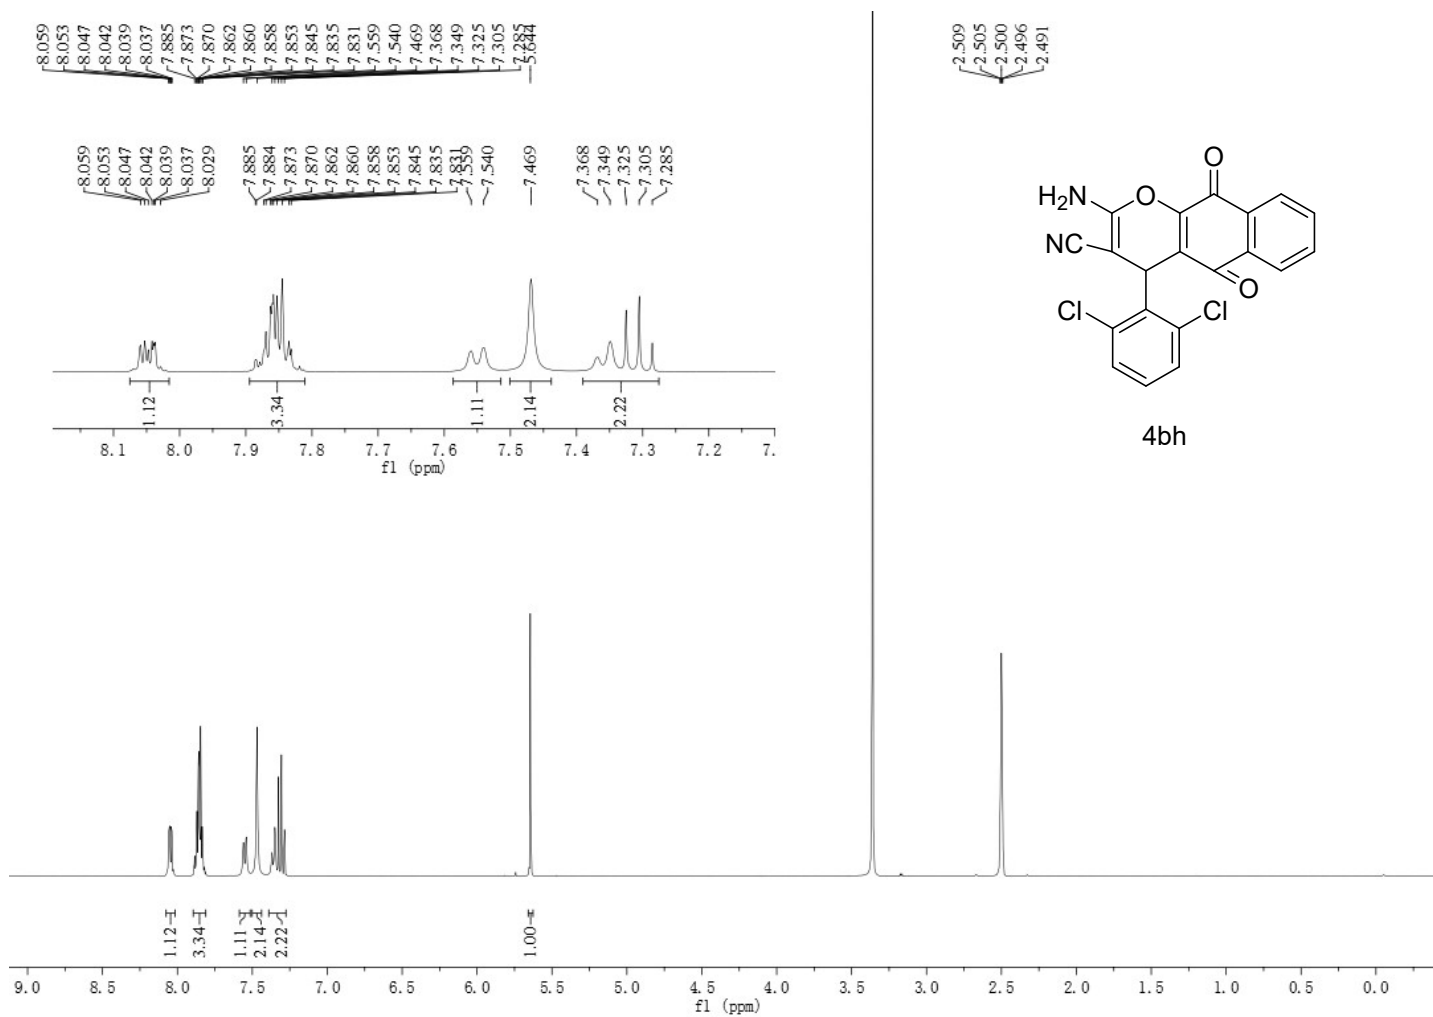

$^1\text{H}$  NMR of Compound **4bh** (400 MHz,  $\text{DMSO-}d_6$ )

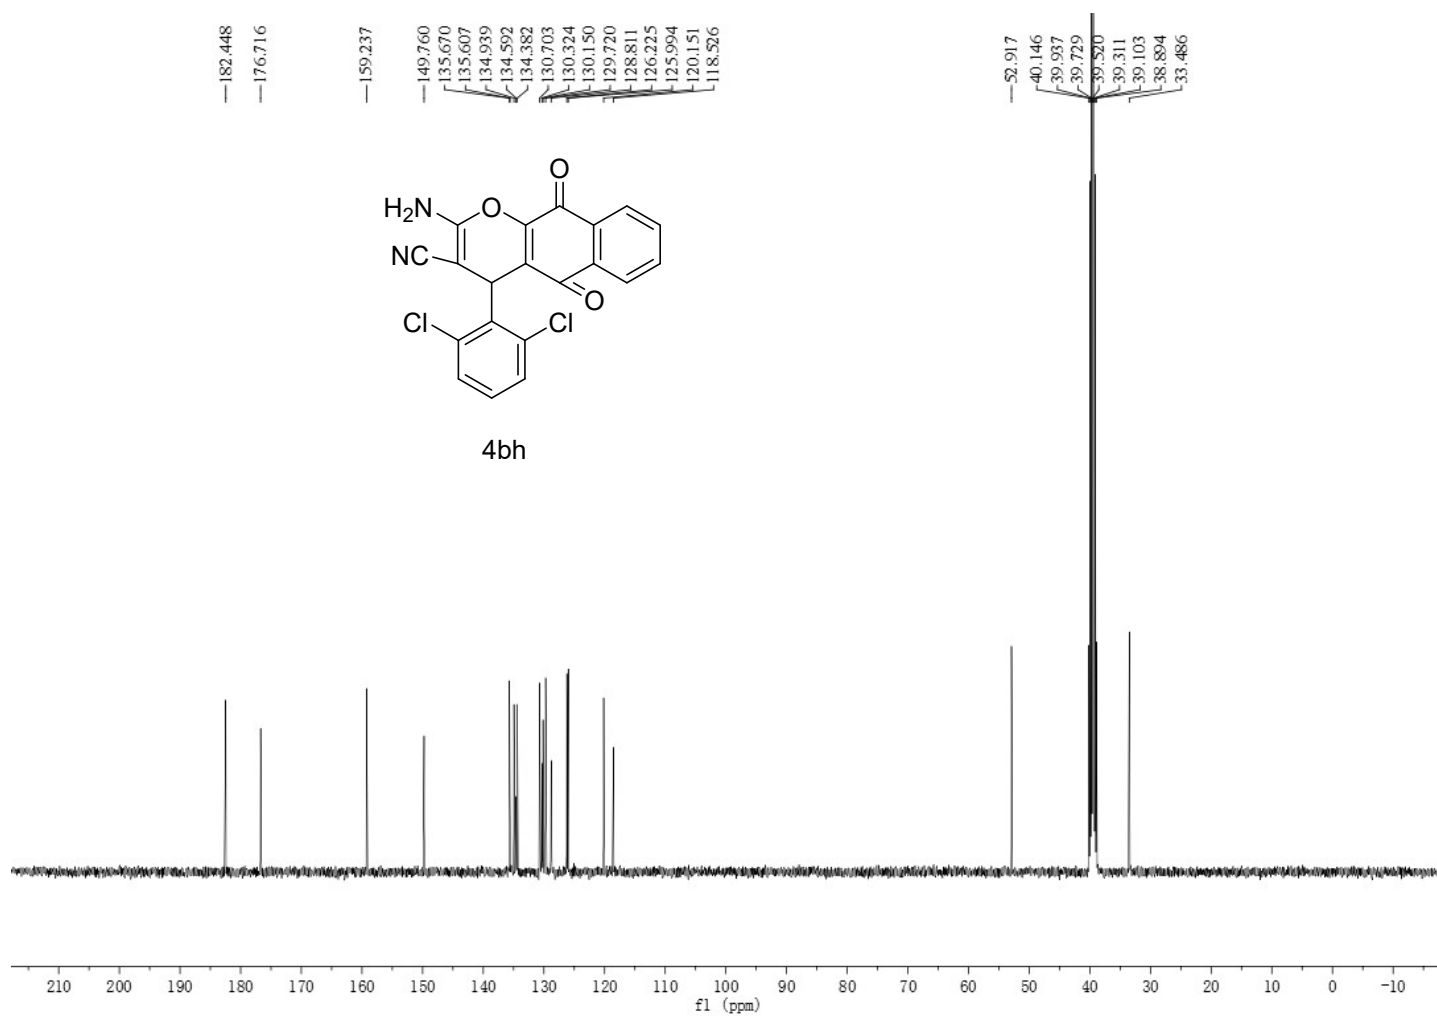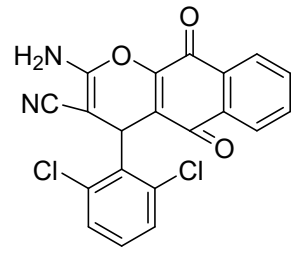

4bh

<sup>13</sup>C NMR of Compound **4bh** (101 MHz, DMSO-*d*<sub>6</sub>)

Item name: TAF-15  
Item description:

Channel name: 1: Average Time 0.1217 min : TOF MS (50-1500) ESI+ : Centroided : Combined

5.59e6

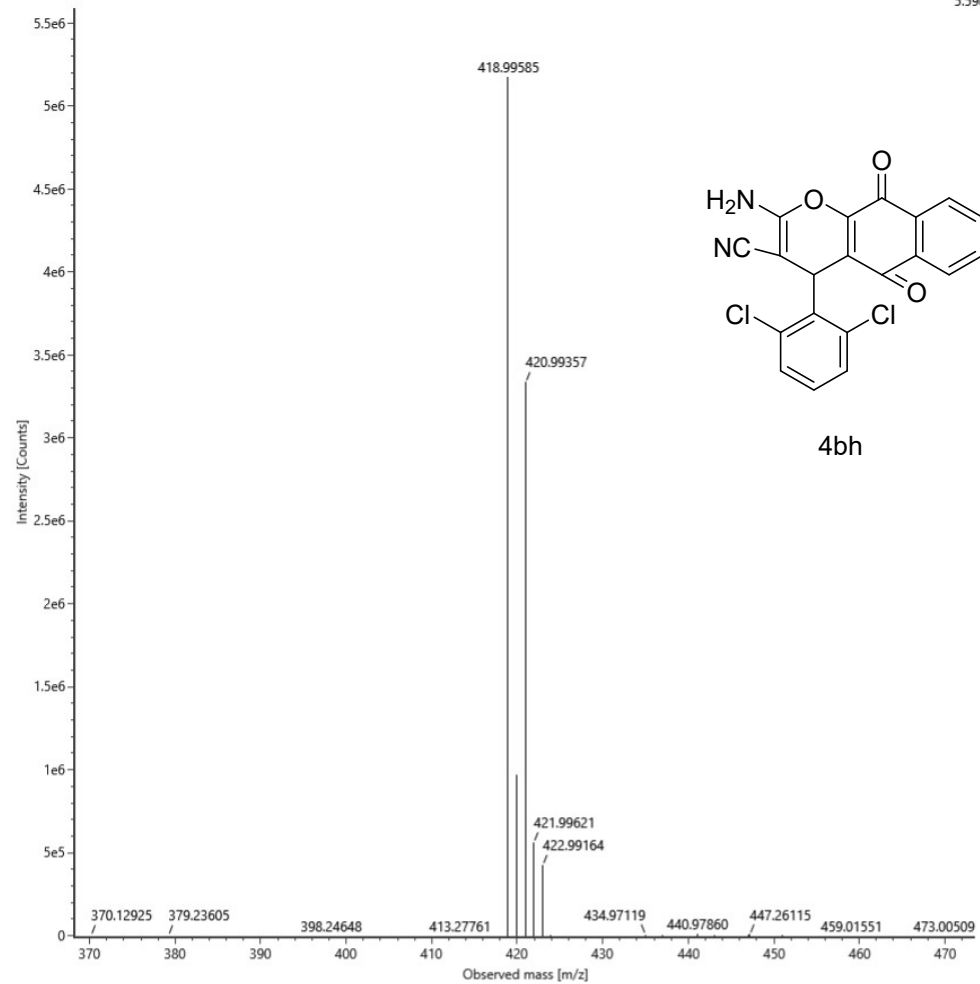

HRMS of Compound **4bh**



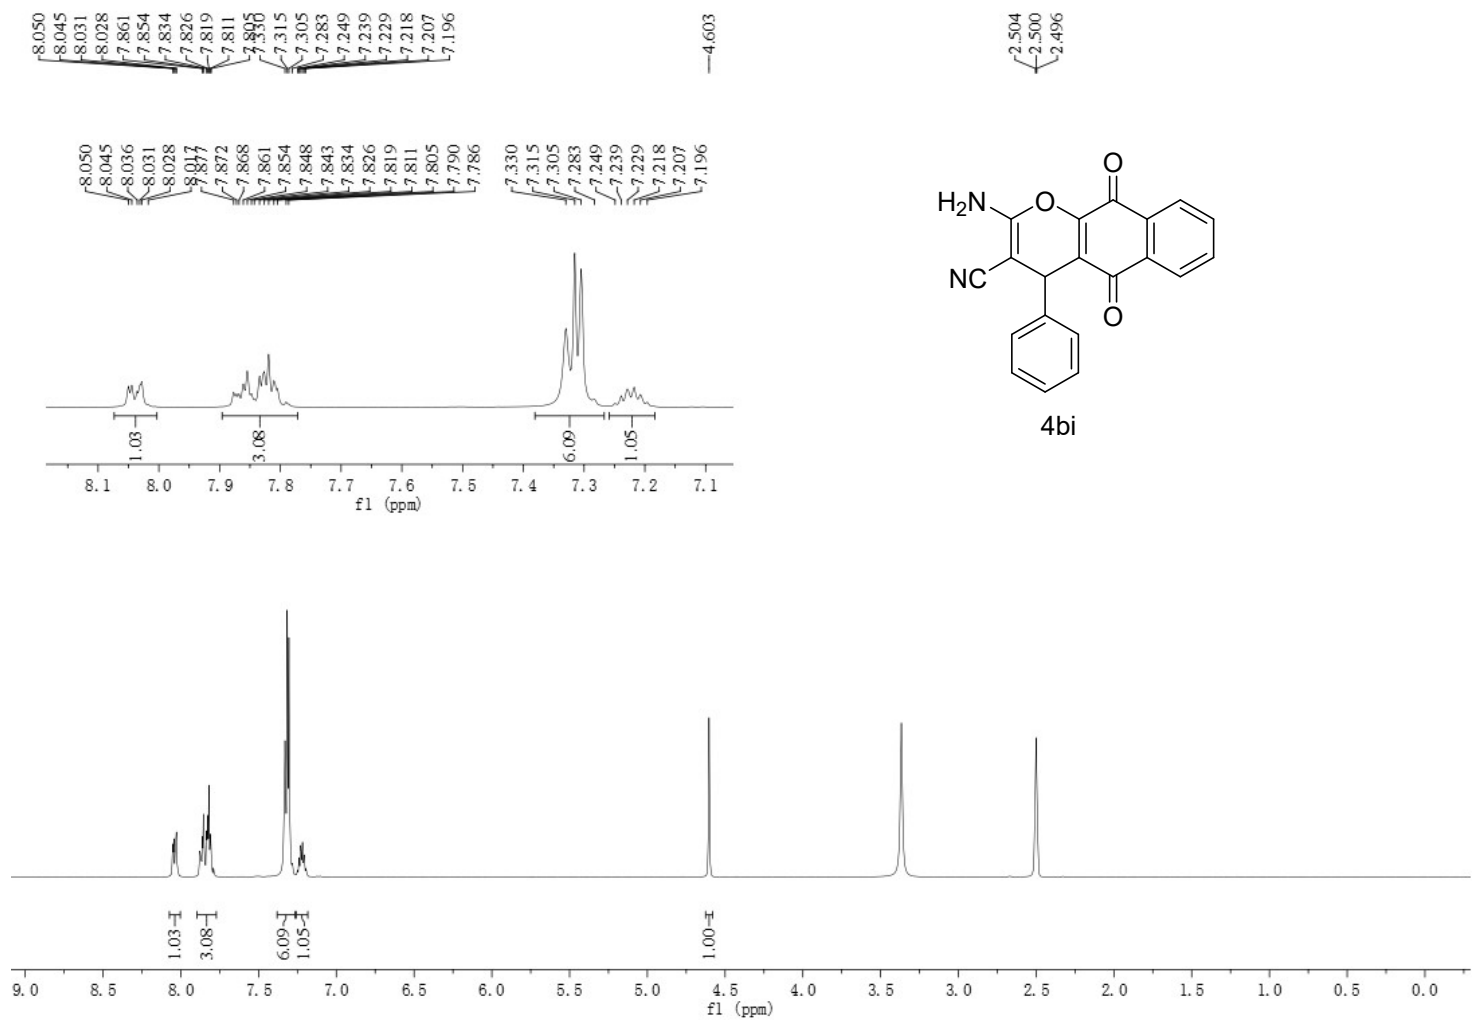

<sup>1</sup>H NMR of Compound **4bi** (400 MHz, DMSO-*d*<sub>6</sub>)

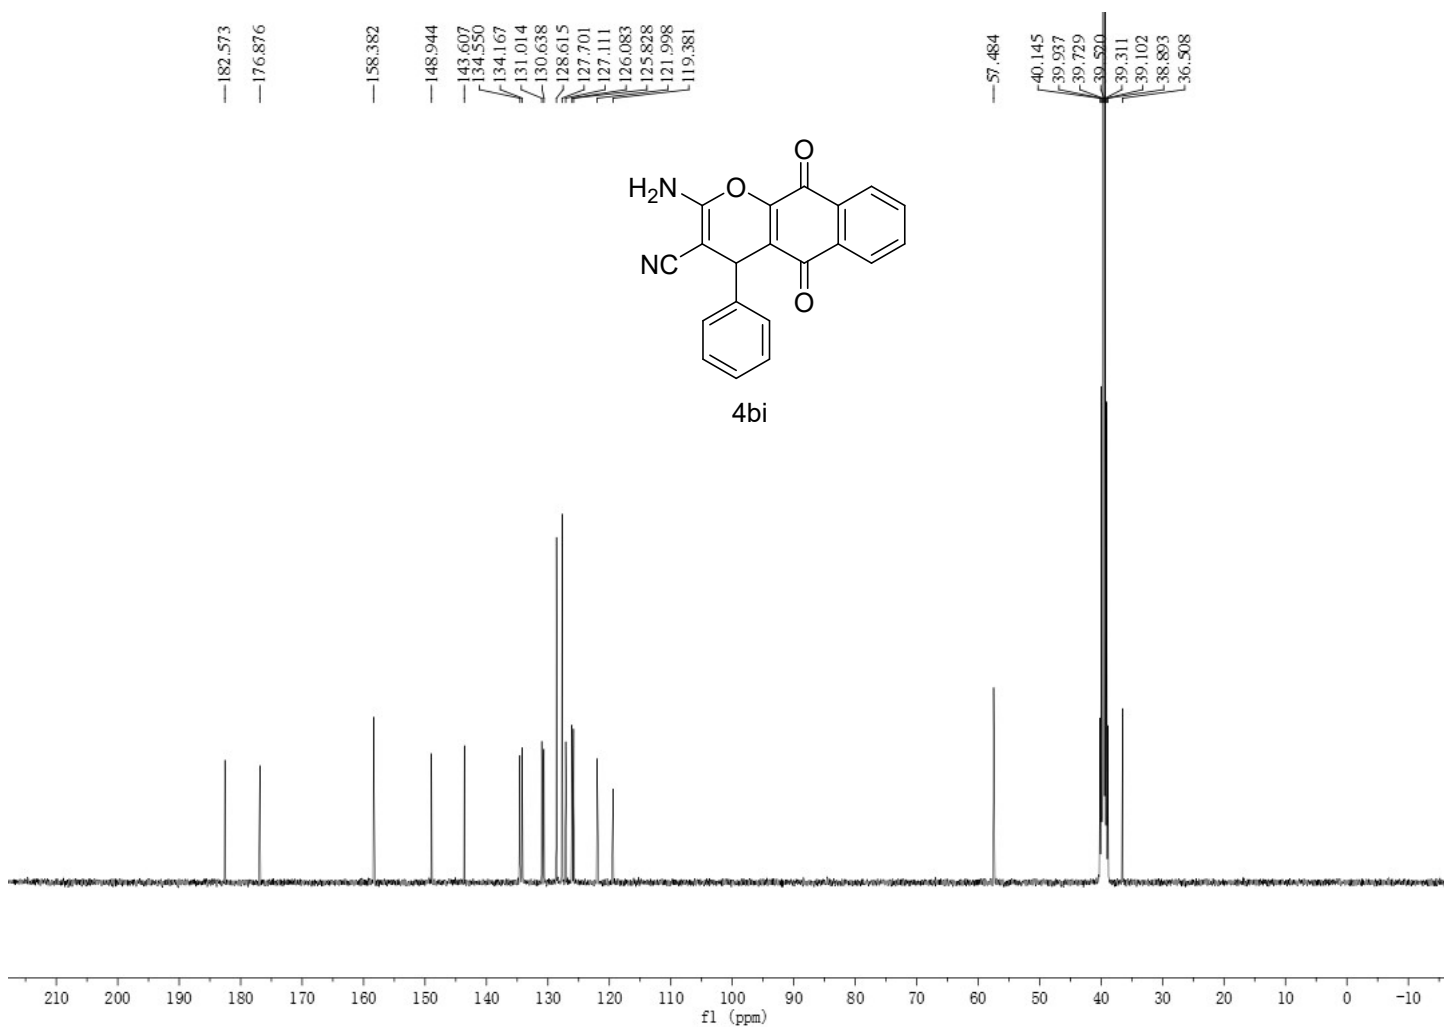

$^{13}\text{C}$  NMR of Compound **4bi** (101 MHz, DMSO-*d*<sub>6</sub>)

Item name: TAF-16  
Item description:

Channel name: 1: Average Time 0.1003 min : TOF MS (50-1500) ESI+ : Centroided : Combined

8.69e6

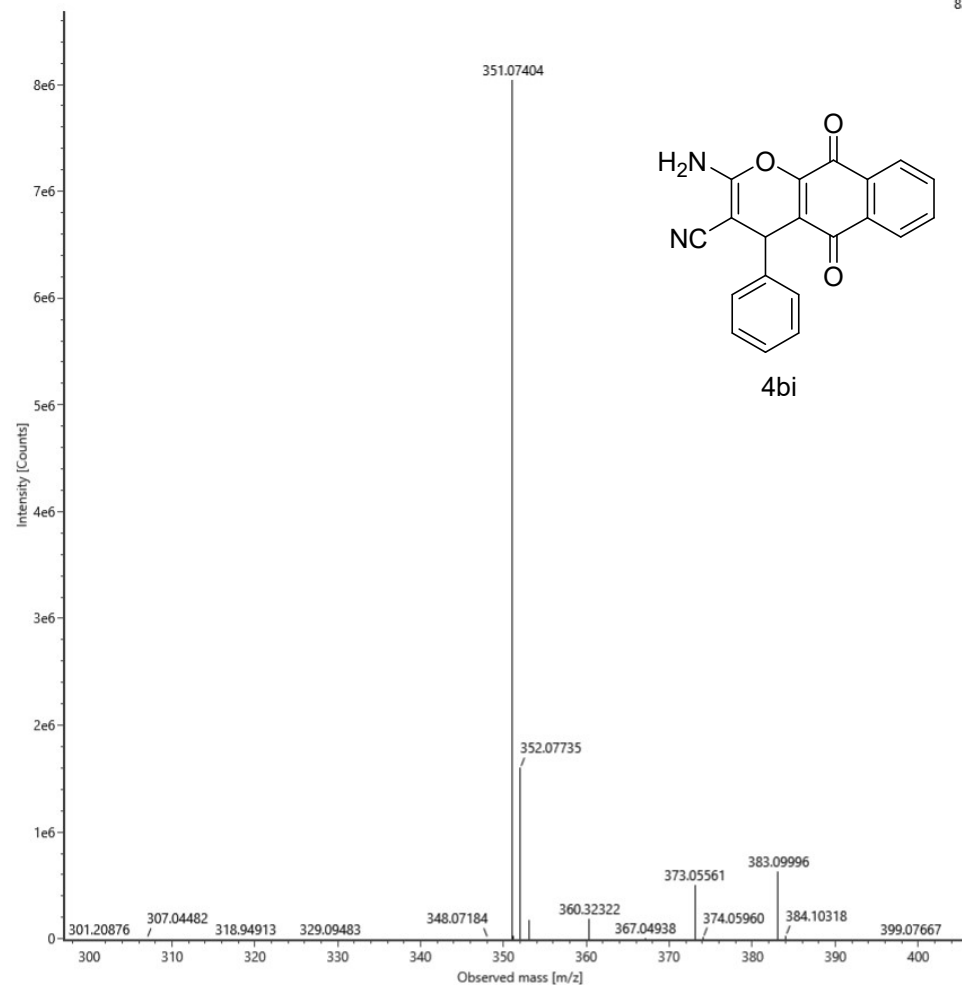

HRMS of Compound **4bi**

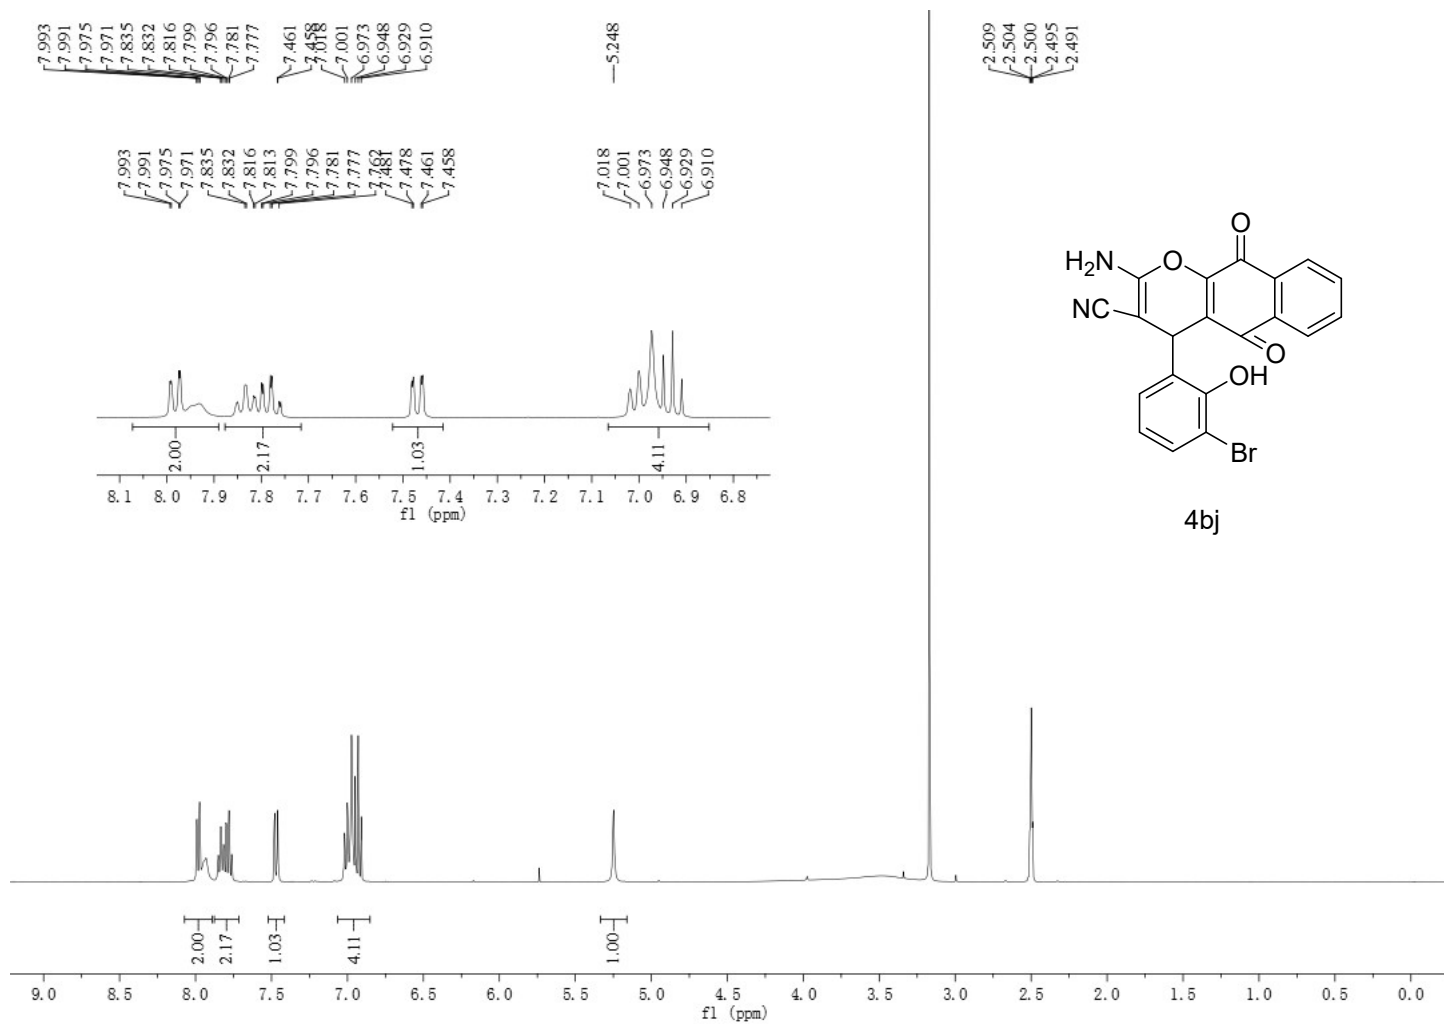

<sup>1</sup>H NMR of Compound **4bj** (400 MHz, DMSO-*d*<sub>6</sub>)

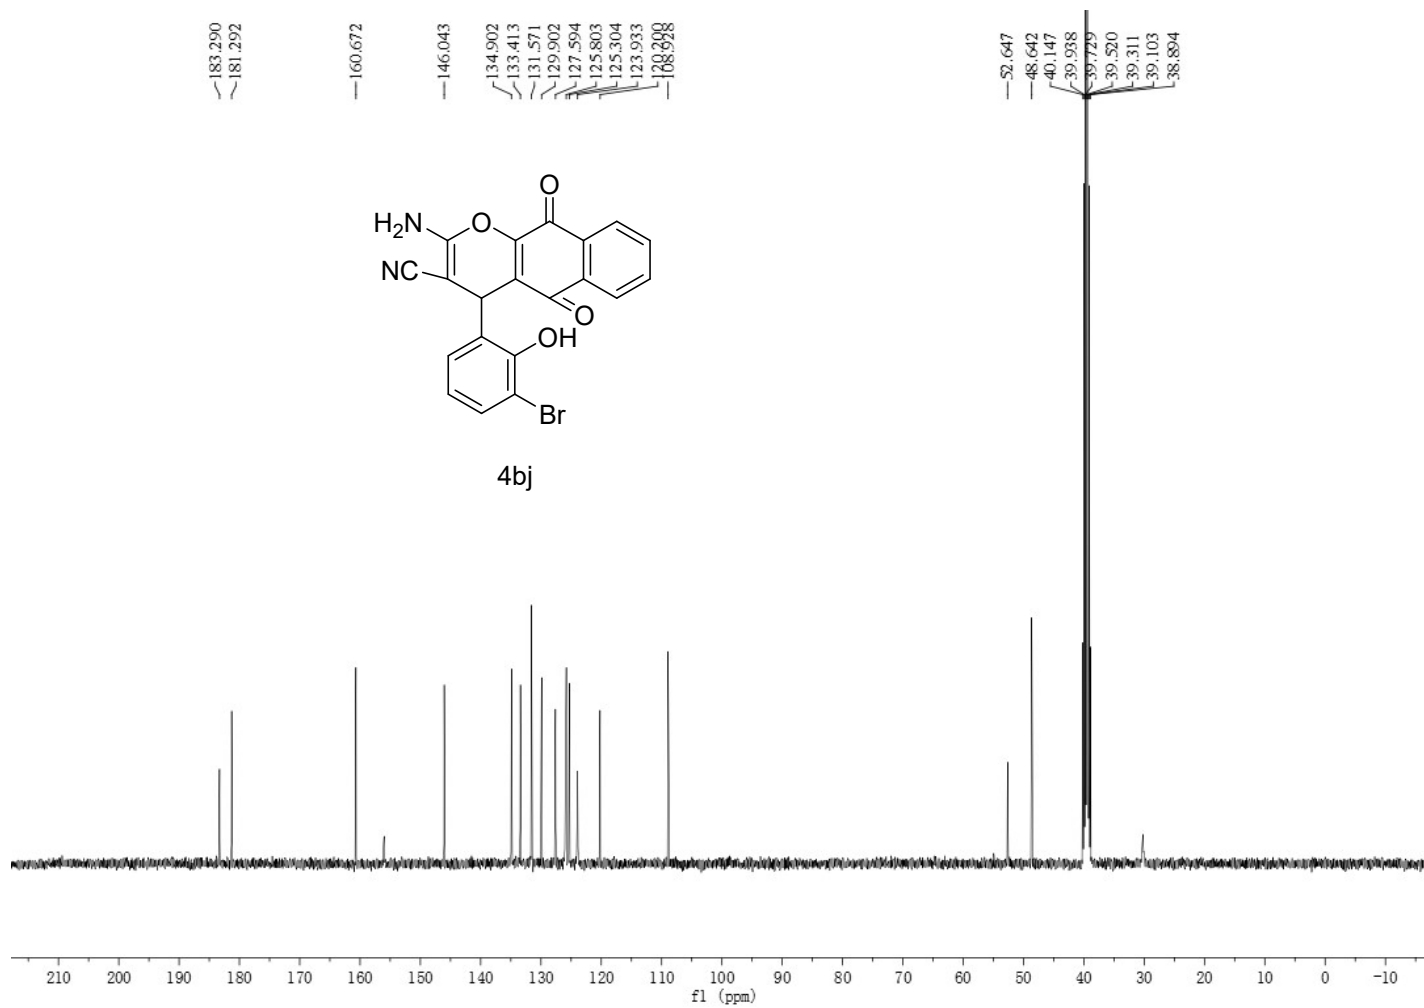

<sup>13</sup>C NMR of Compound **4bj** (101 MHz, DMSO-*d*<sub>6</sub>)

Item name: TAF-18  
Item description:

Channel name: 1: Average Time 0.1806 min : TOF MS (50-1500) ESI+ : Centroided : Combined

3.93e6

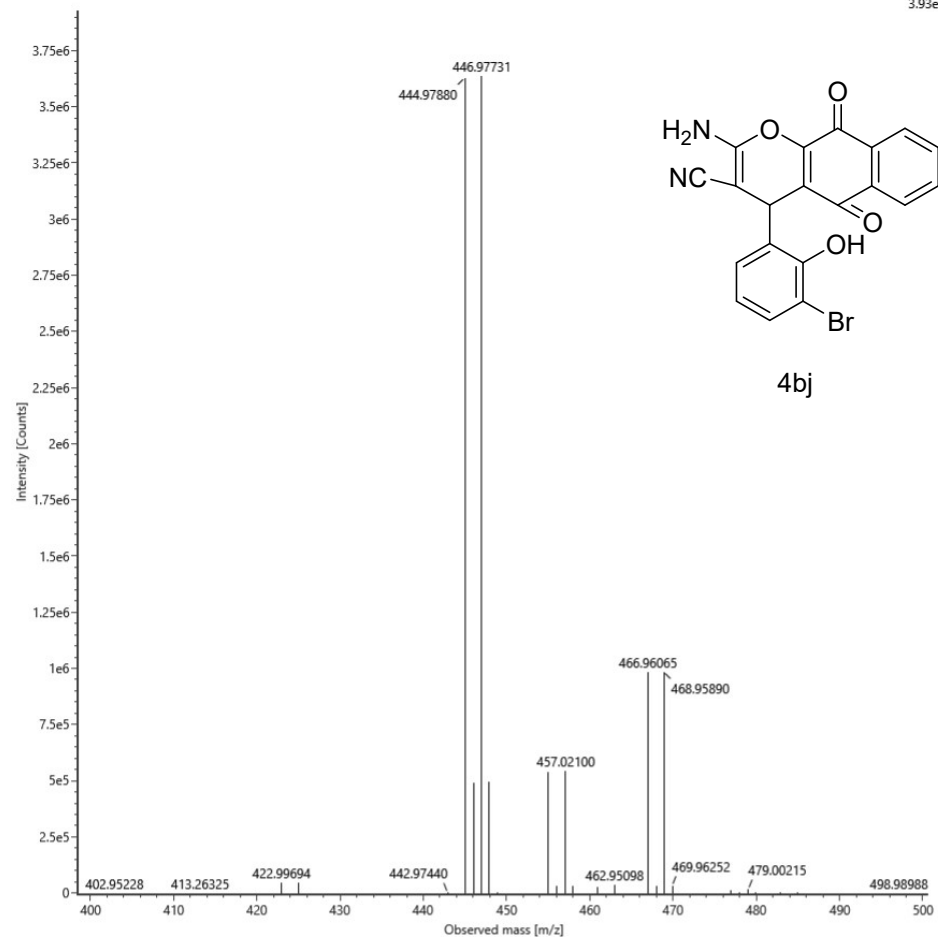

HRMS of Compound **4bj**

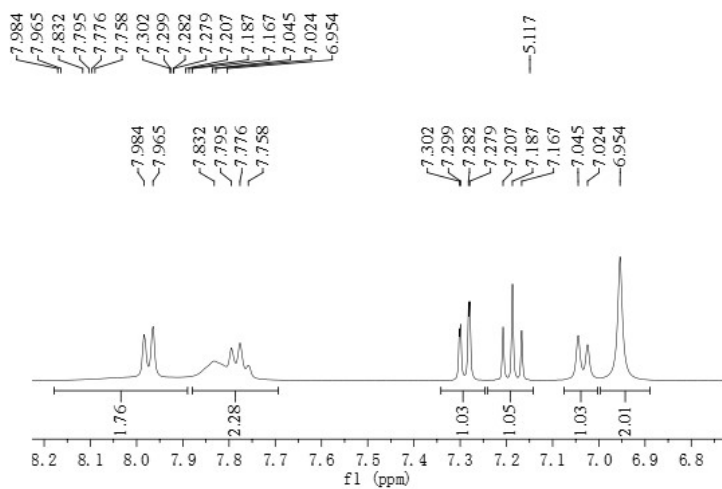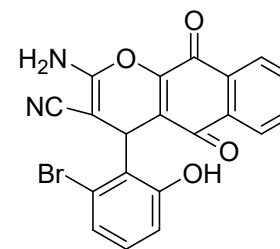

4bk

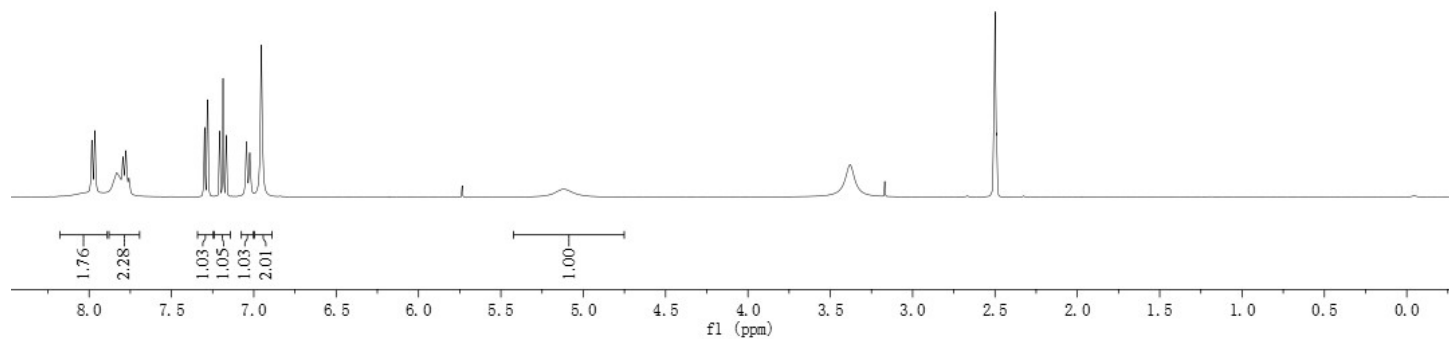

<sup>1</sup>H NMR of Compound **4bk** (400 MHz, DMSO-*d*<sub>6</sub>)

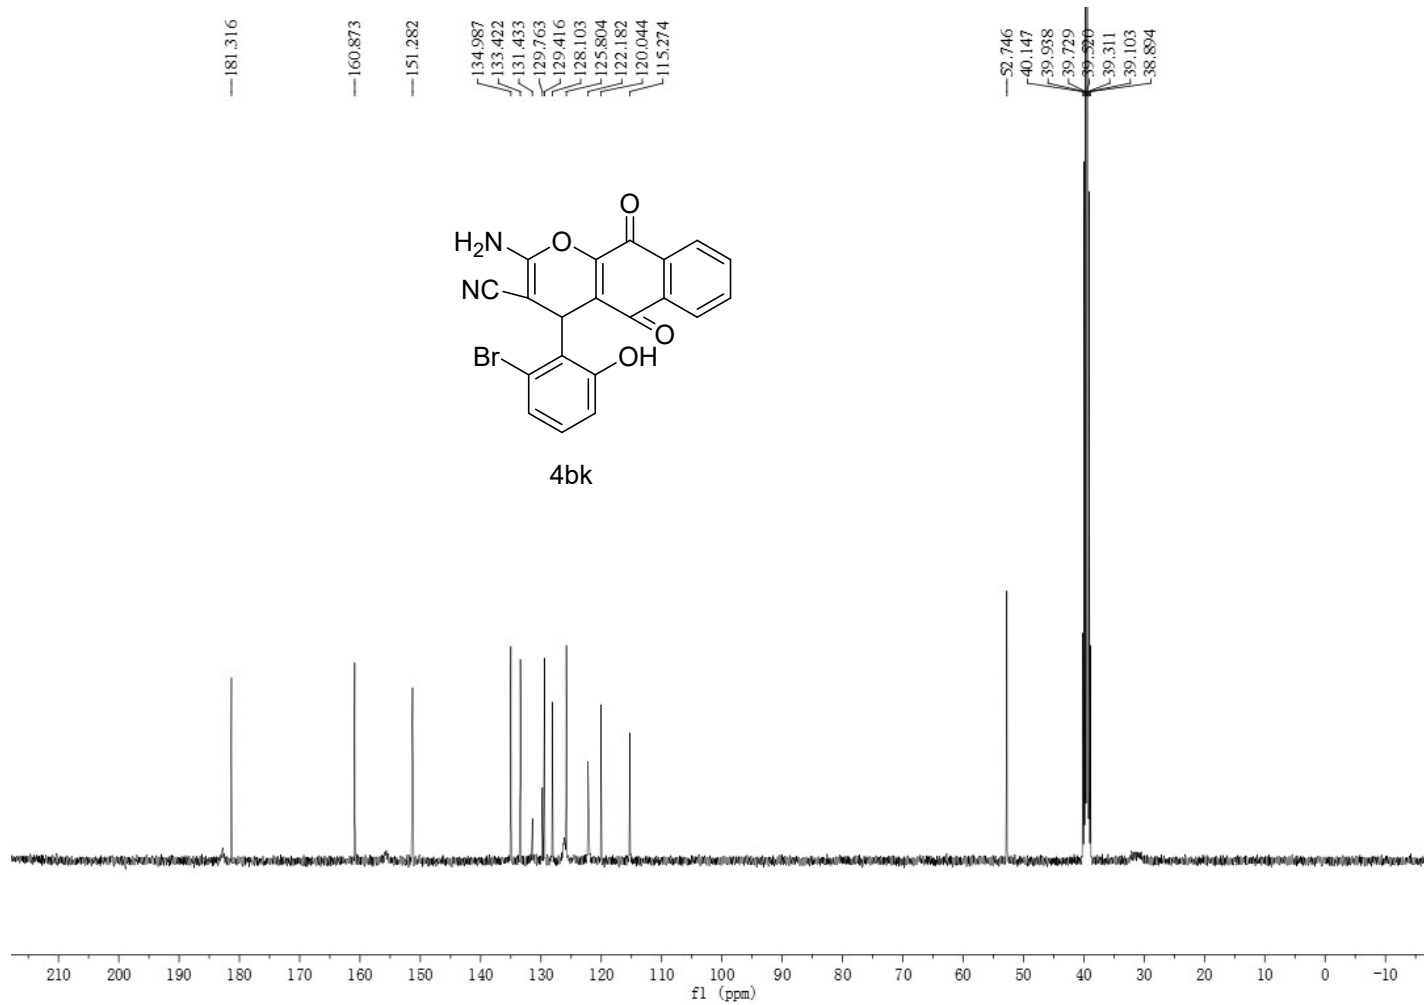

<sup>13</sup>C NMR of Compound **4bk** (101 MHz, DMSO-*d*<sub>6</sub>)



Item name: TAF-19  
Item description:

Channel name: 1: Average Time 0.1334 min : TOF MS (50-1500) ESI+ : Centroided : Combined

7.06e6

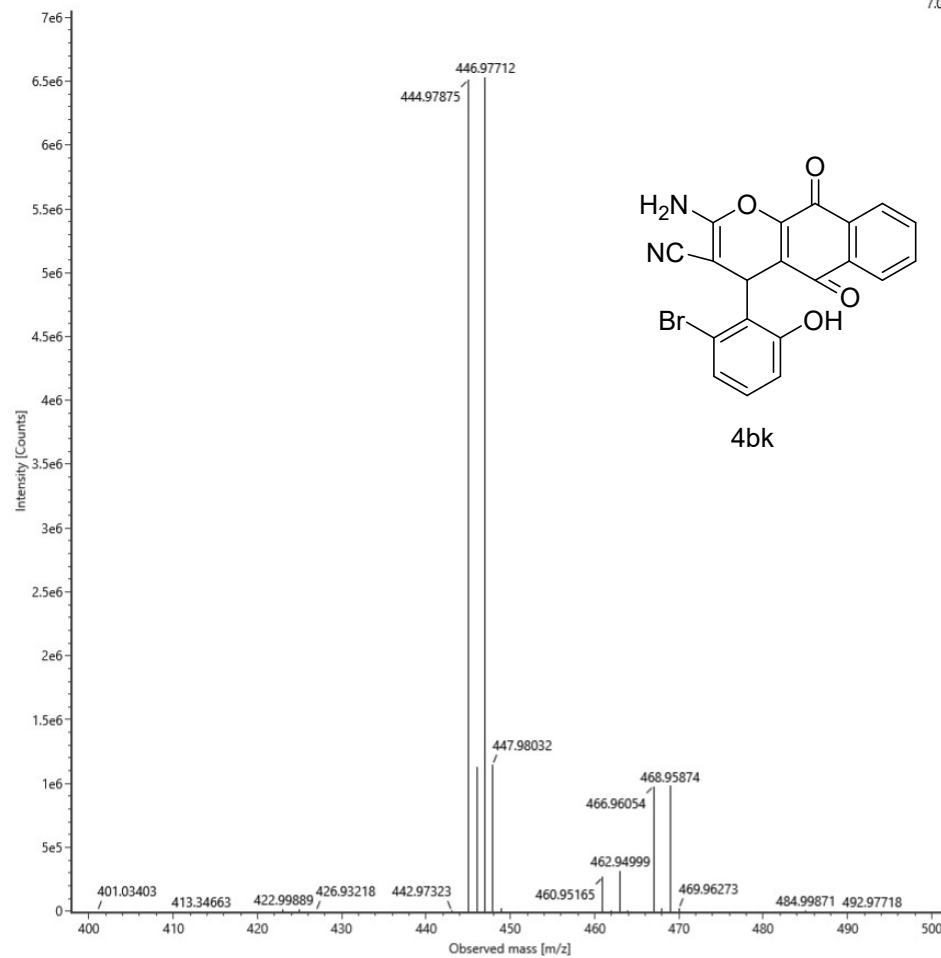

HRMS of Compound **4bk**

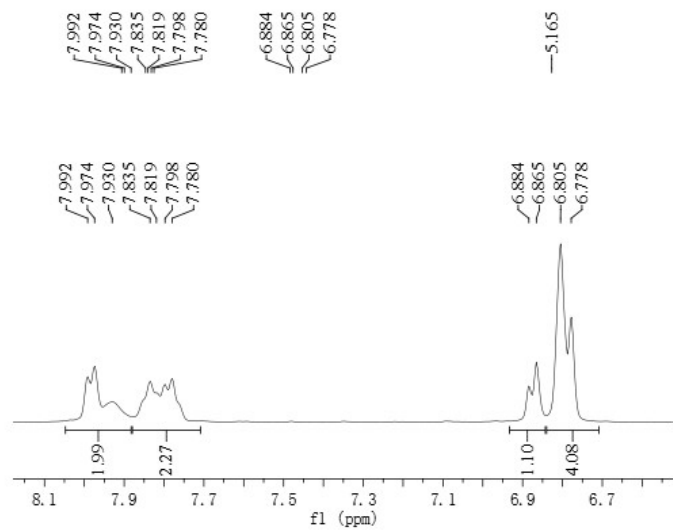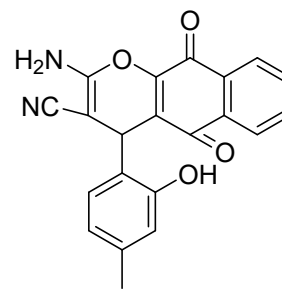

4bl

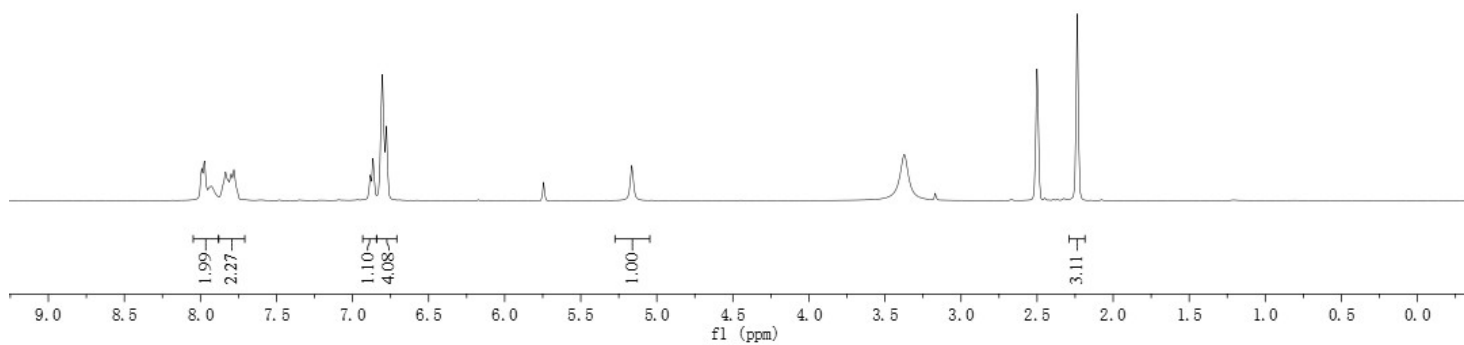

$^1\text{H}$  NMR of Compound **4bl** (400 MHz,  $\text{DMSO-}d_6$ )

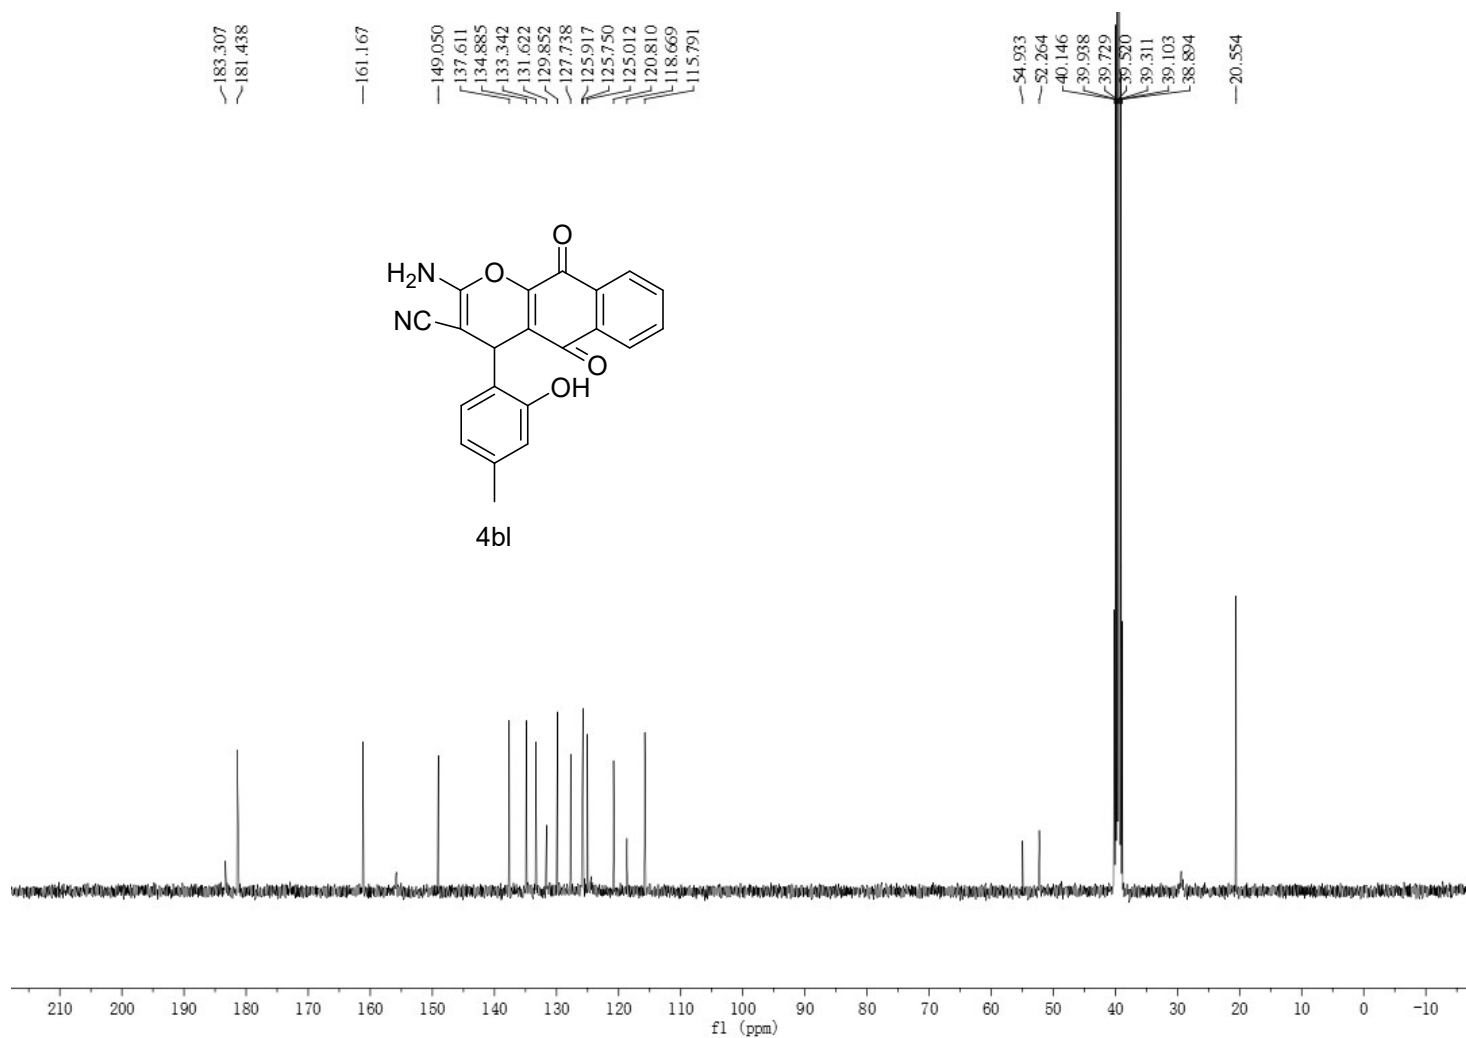

<sup>13</sup>C NMR of Compound **4bl** (101 MHz, DMSO-*d*<sub>6</sub>)

Item name: TAF-20  
Item description:

Channel name: 1: Average Time 0.1217 min : TOF MS (50-1500) ESI+ : Centroided : Combined

7.37e6

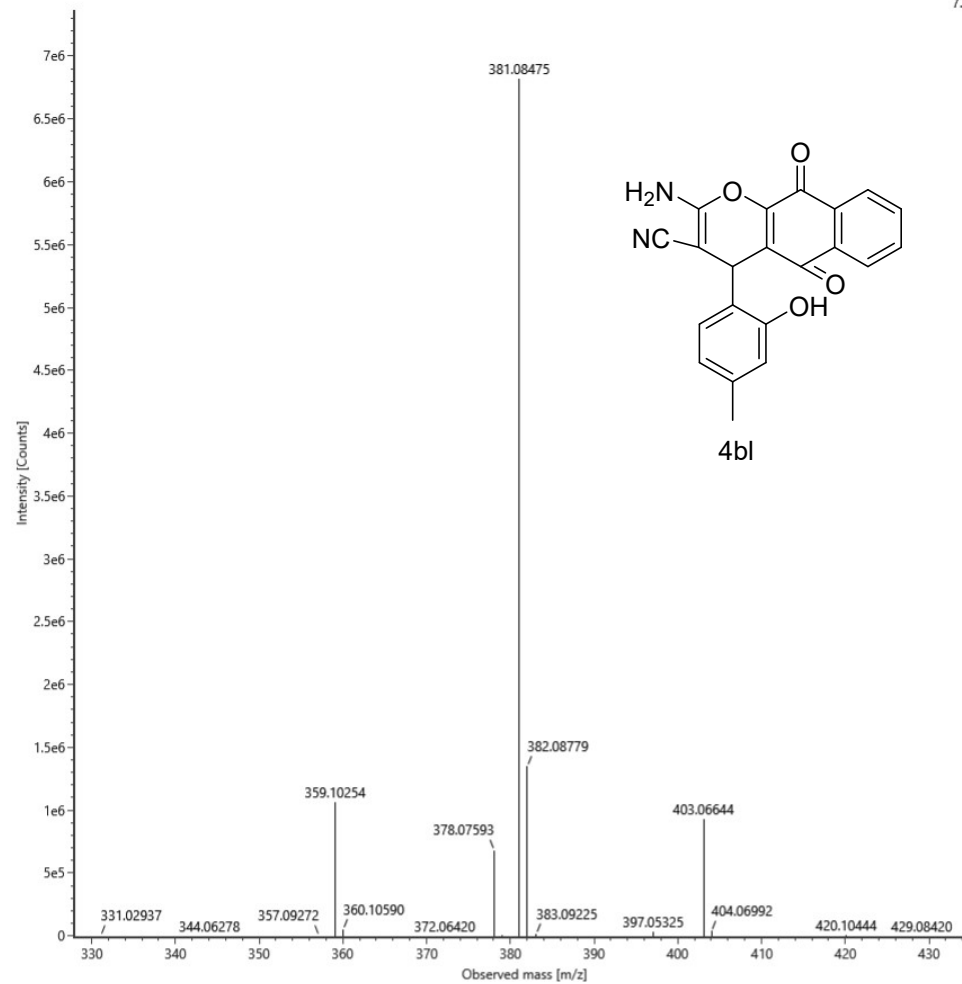

HRMS of Compound **4bl**

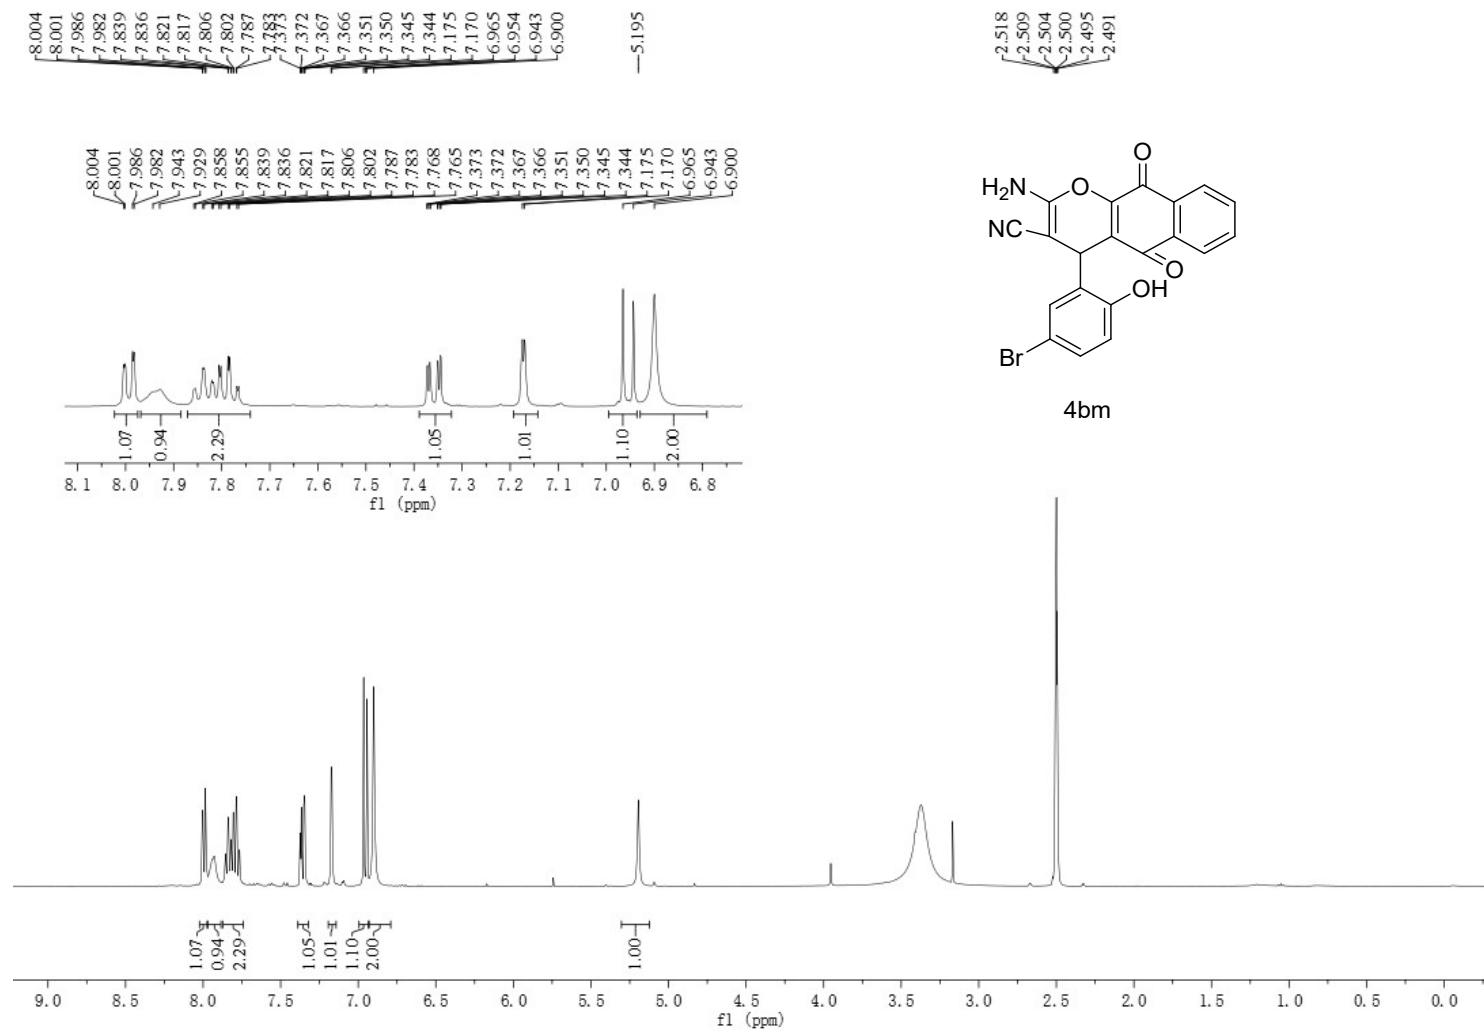

<sup>1</sup>H NMR of Compound **4bm** (400 MHz, DMSO-d6)

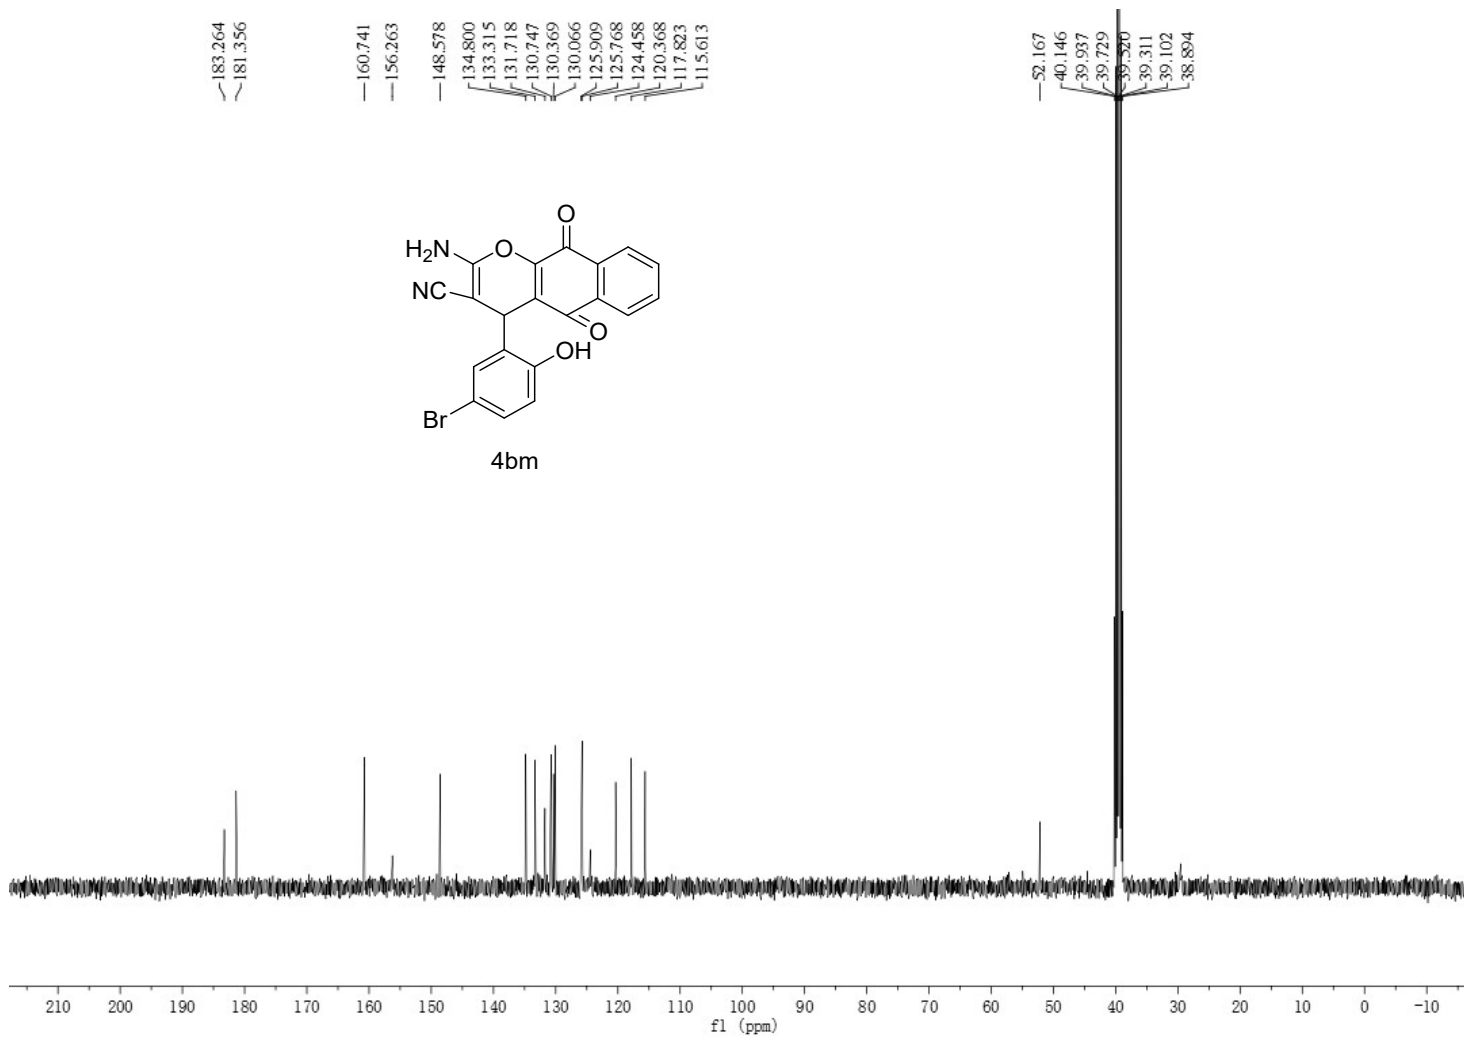

<sup>13</sup>C NMR of Compound **4bm** (101 MHz, DMSO-*d*<sub>6</sub>)

Item name: TAF-21  
Item description:

Channel name: 1: Average Time 0.1089 min : TOF MS (50-1500) ESI+ : Centroided : Combined

1.31e6

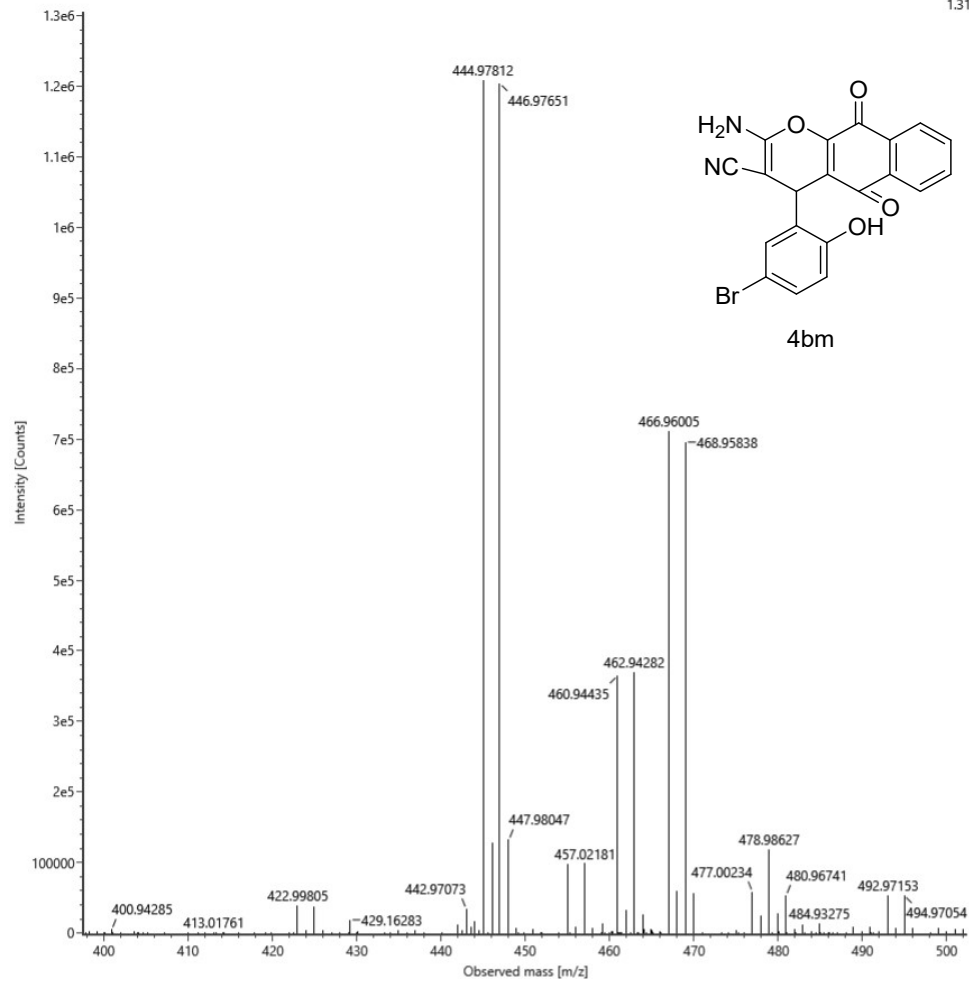

HRMS of Compound 4bm

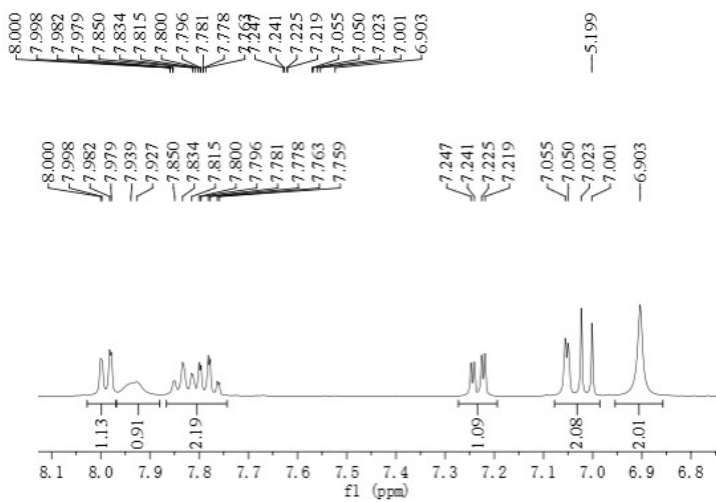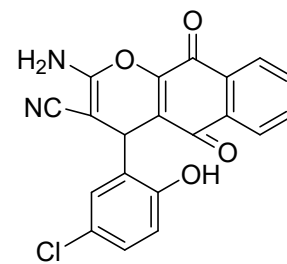

4bn

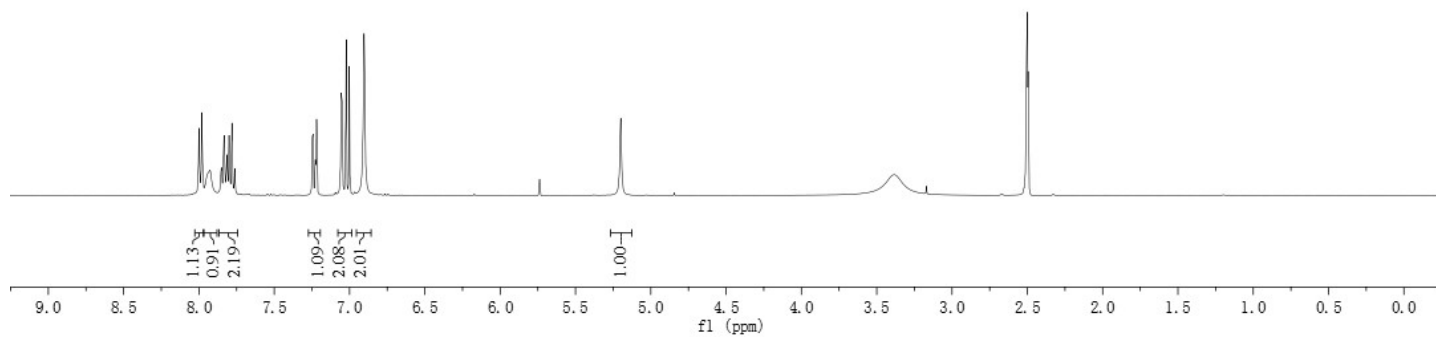

<sup>1</sup>H NMR of Compound **4bn** (400 MHz, DMSO-*d*<sub>6</sub>)



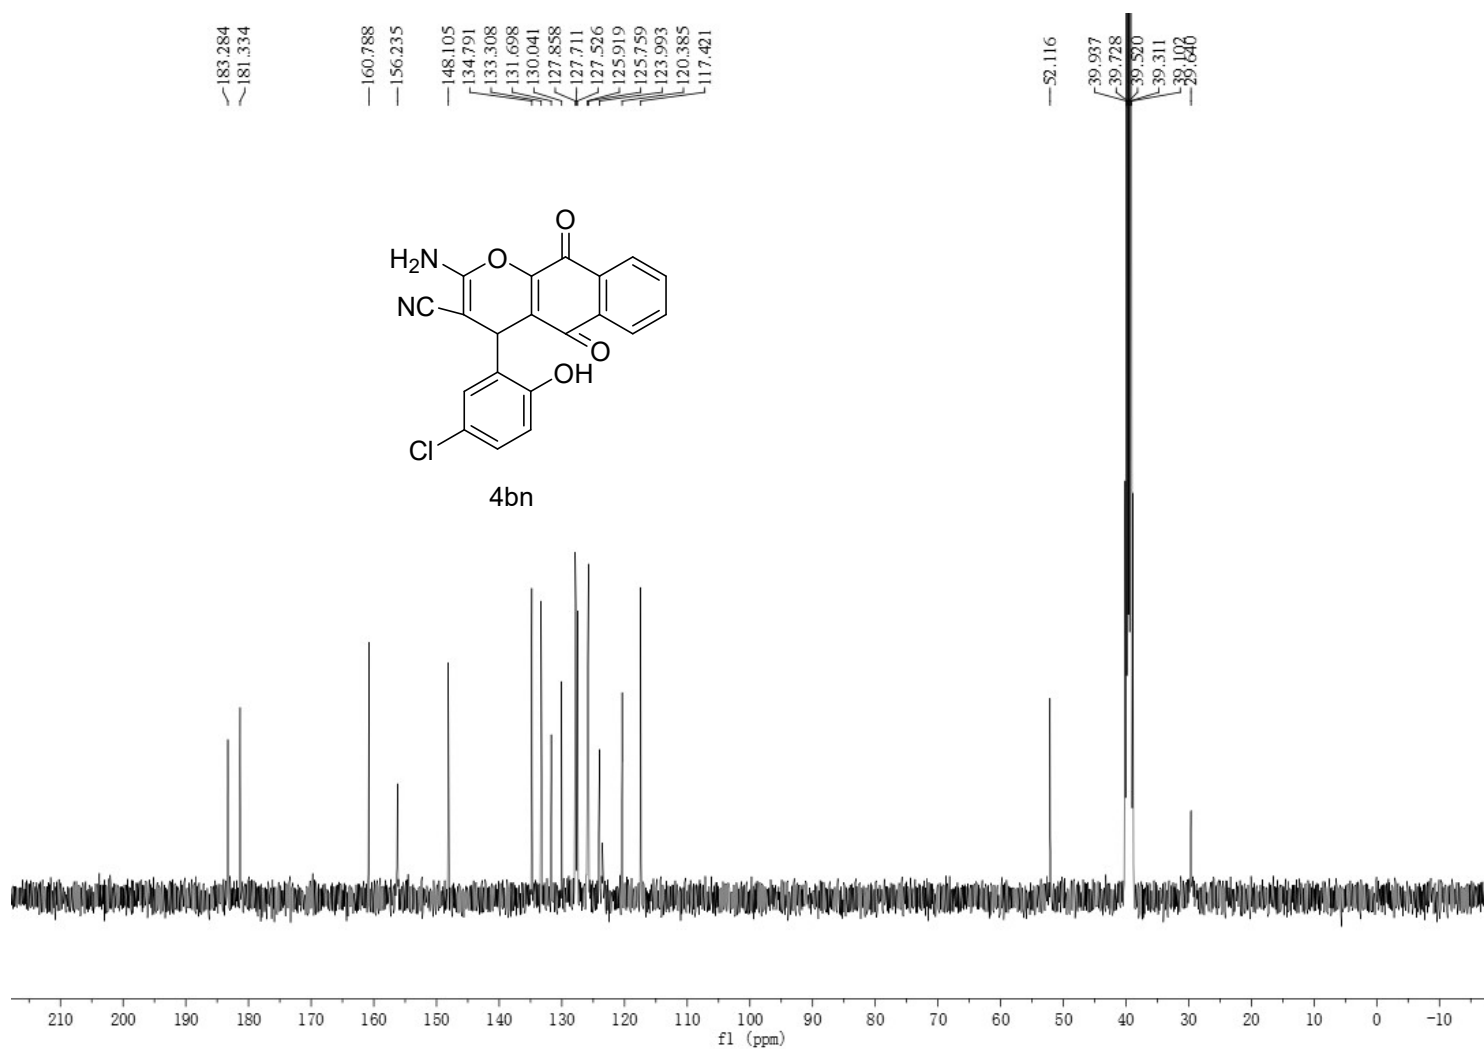

<sup>13</sup>C NMR of Compound **4bn** (101 MHz, DMSO-*d*<sub>6</sub>)

Item name: TAF-25  
Item description:

Channel name: 1: Average Time 0.1174 min : TOF MS (50-1500) ESI+ : Centroided : Combined

2.01e6

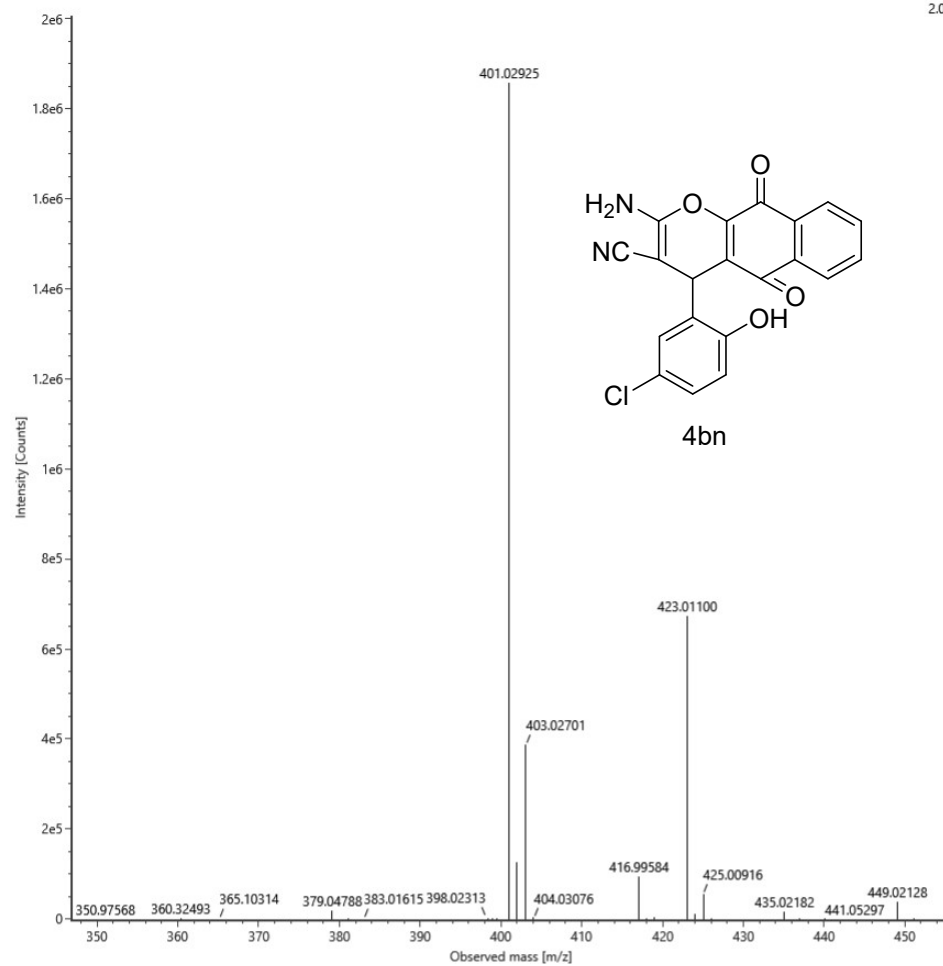

HRMS of Compound **4bn**

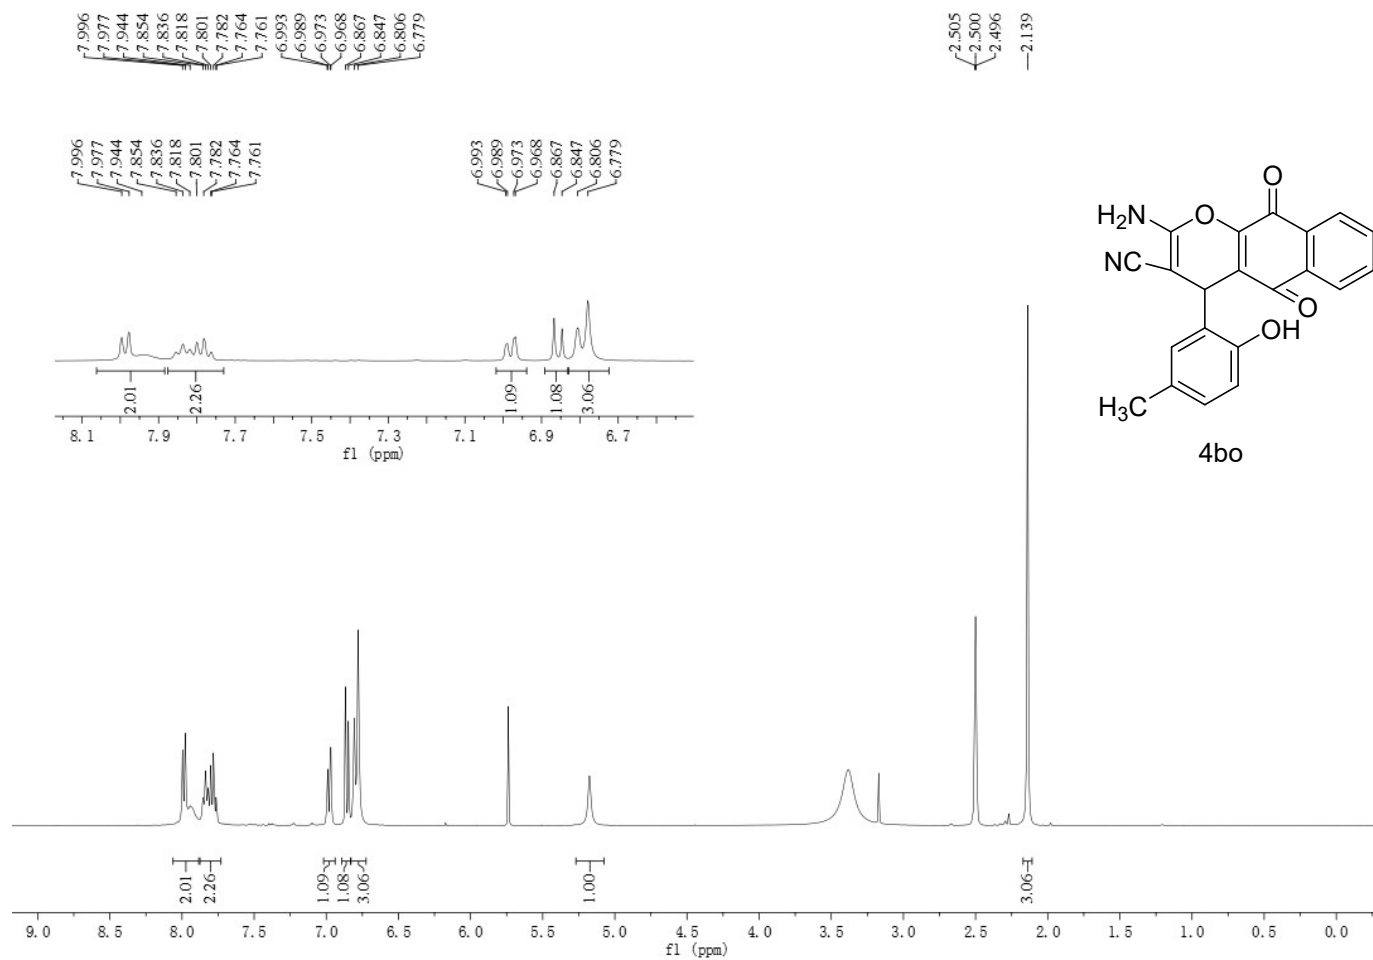

<sup>1</sup>H NMR of Compound **4bo** (400 MHz, DMSO-*d*<sub>6</sub>)

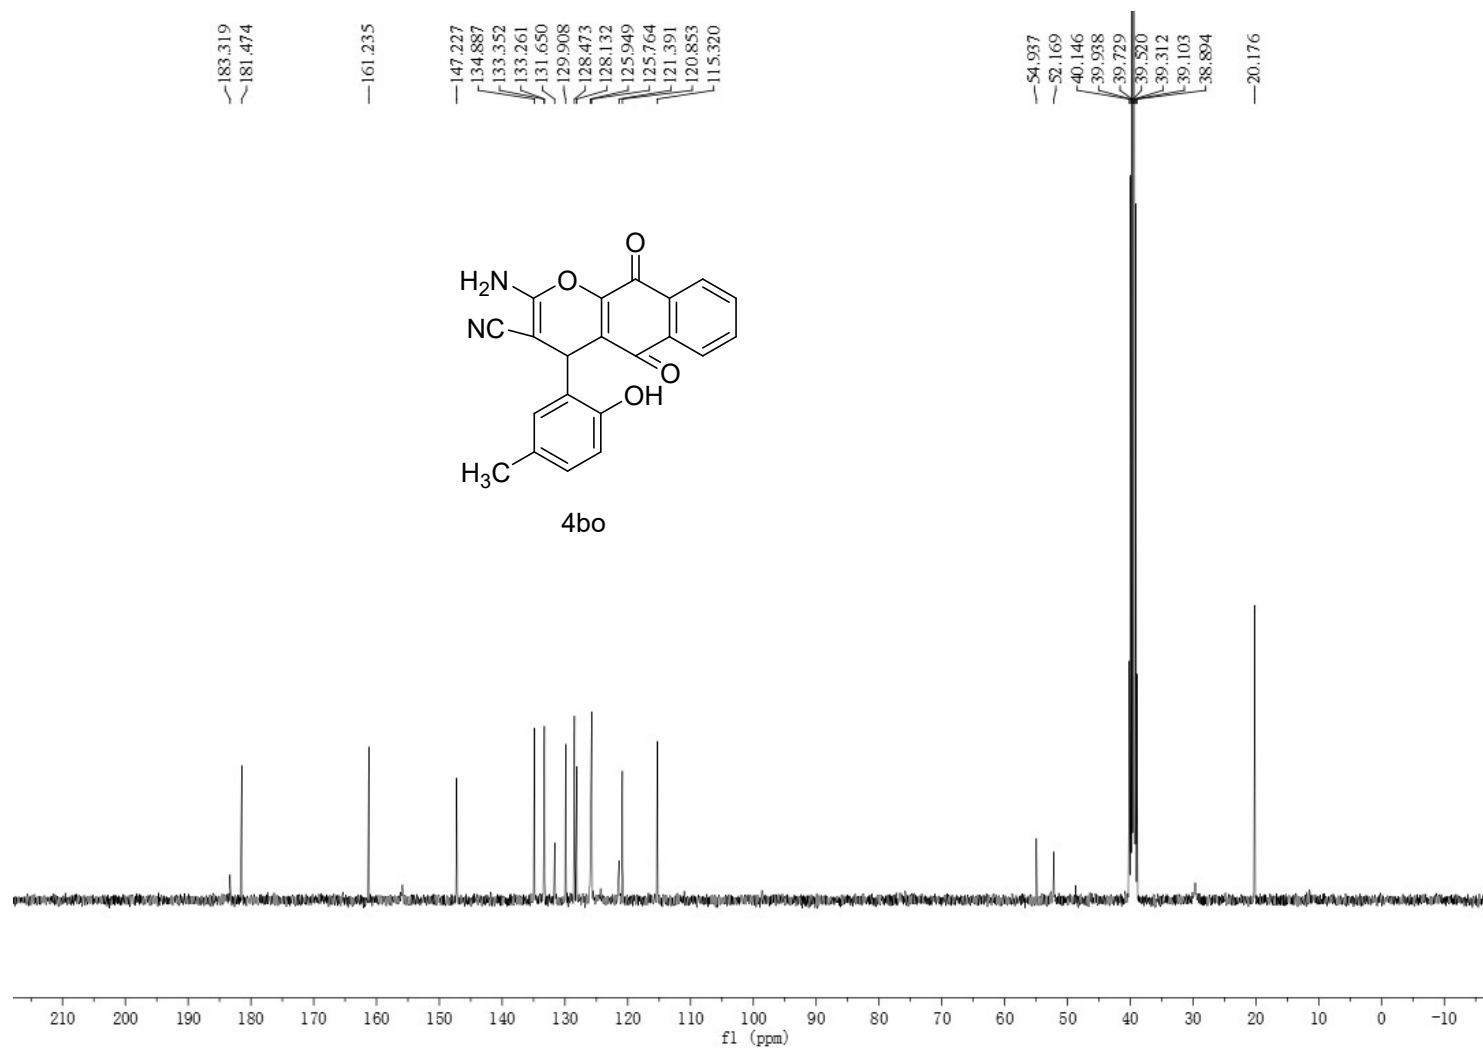

<sup>13</sup>C NMR of Compound **4bo** (101 MHz, DMSO-*d*<sub>6</sub>)

Item name: TAF-22  
Item description:

Channel name: 1: Average Time 0.1131 min : TOF MS (50-1500) ESI+ : Centroided : Combined

9.96e6

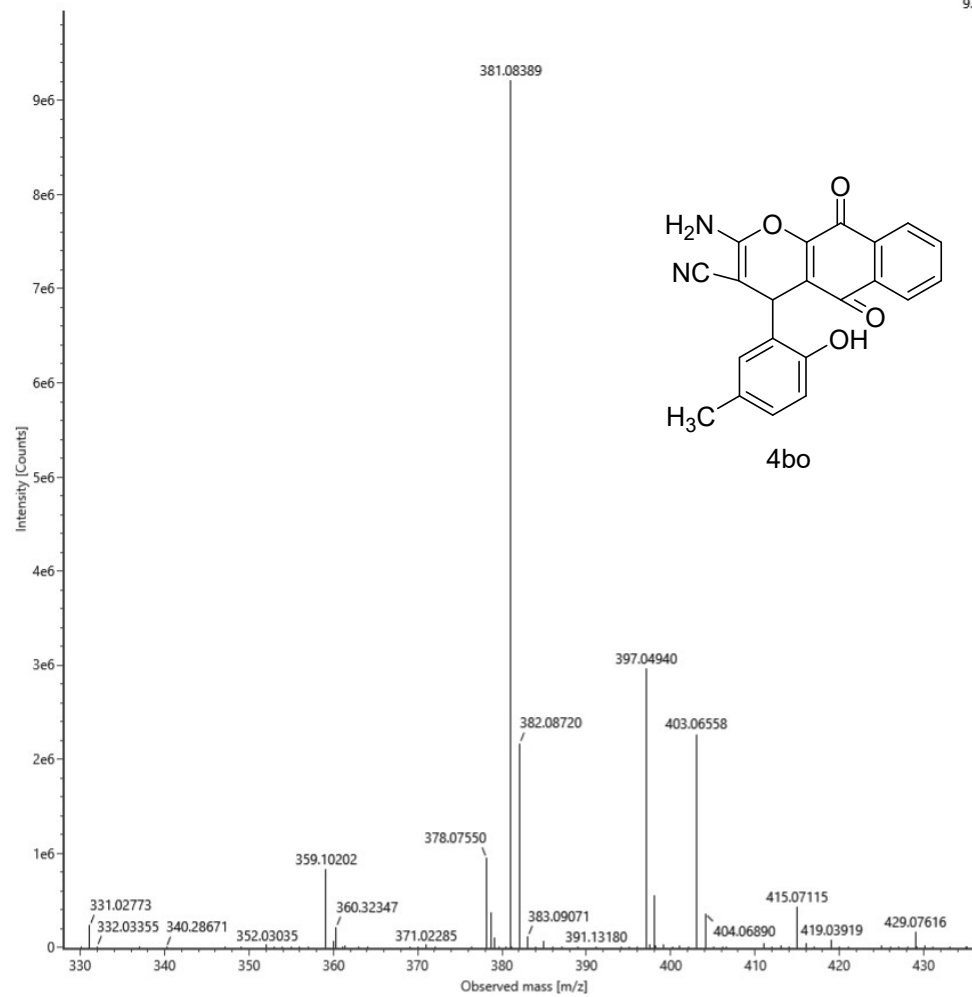

HRMS of Compound **4bo**

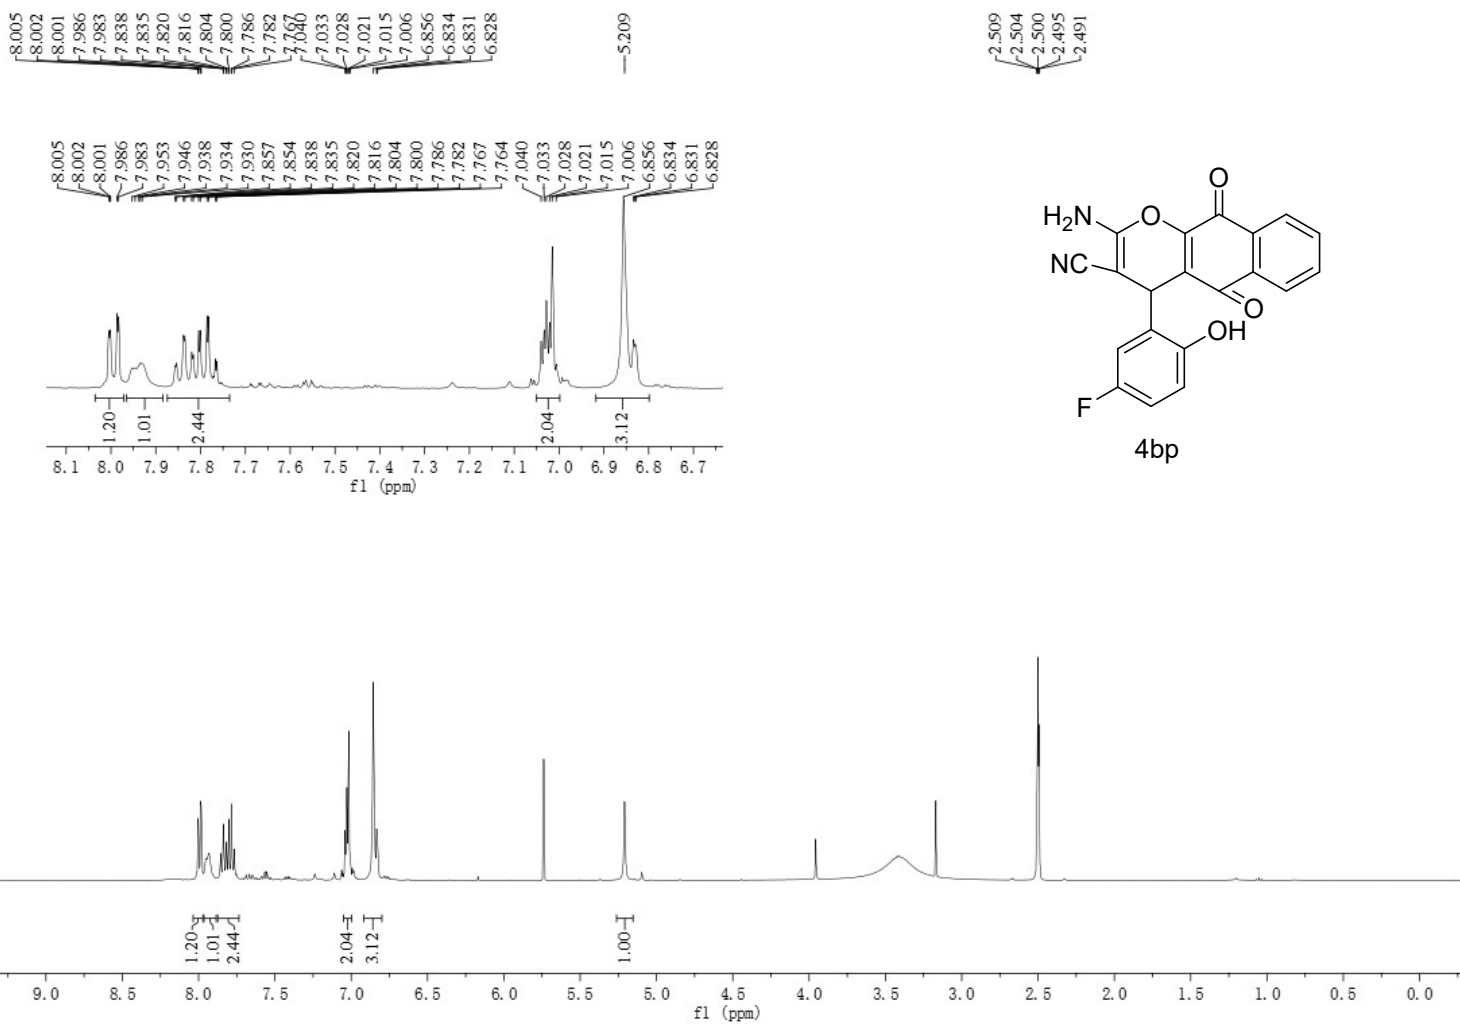

<sup>1</sup>H NMR of Compound **4bp** (400 MHz, DMSO-*d*<sub>6</sub>)

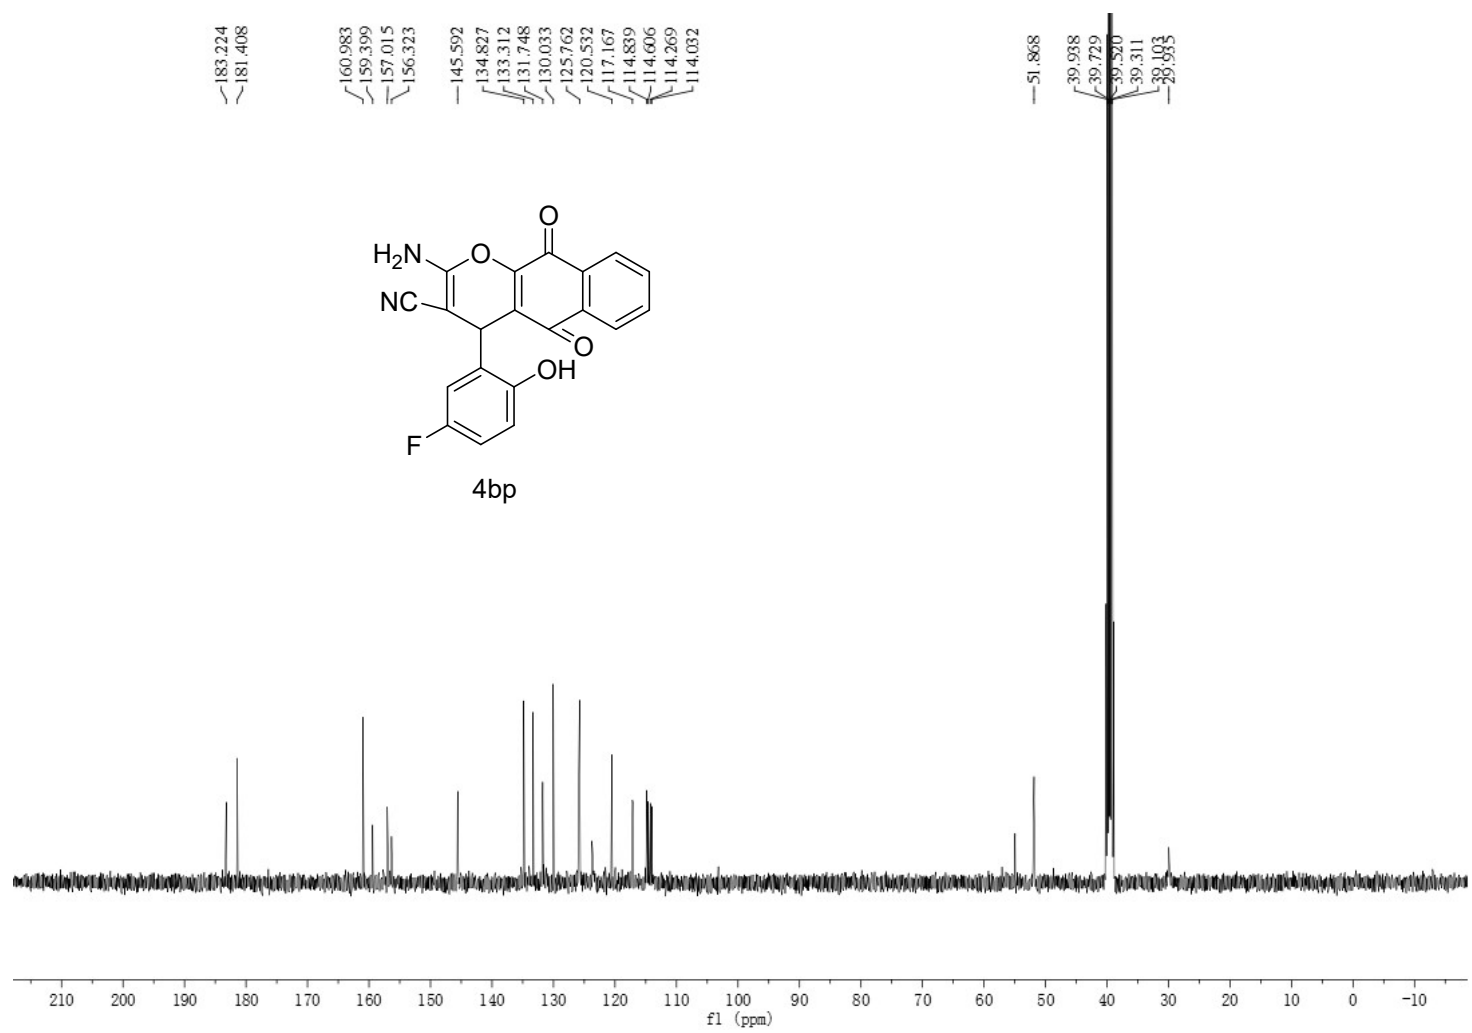

<sup>13</sup>C NMR of Compound **4bp** (101 MHz, DMSO-*d*<sub>6</sub>)

Item name: TAF-23  
Item description:

Channel name: 1: Average Time 0.1089 min : TOF MS (50-1500) ESI+ : Centroided : Combined

9.43e6

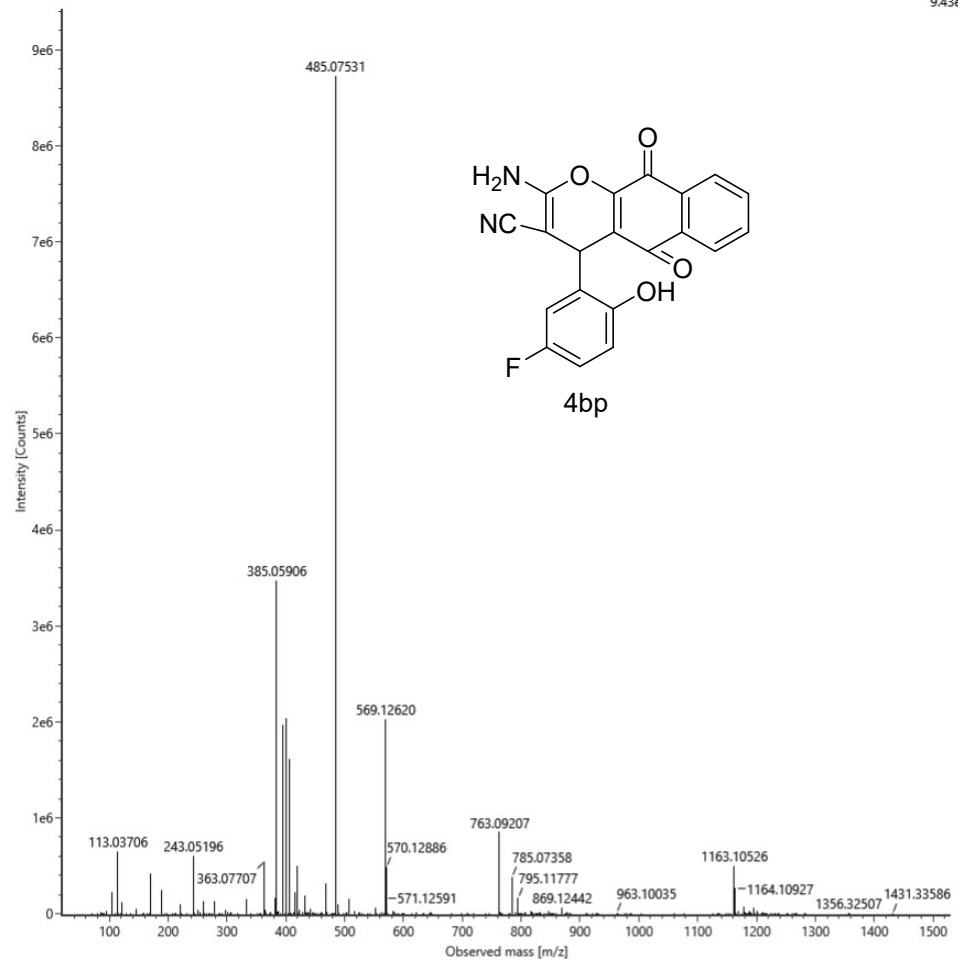

HRMS of Compound 4bp



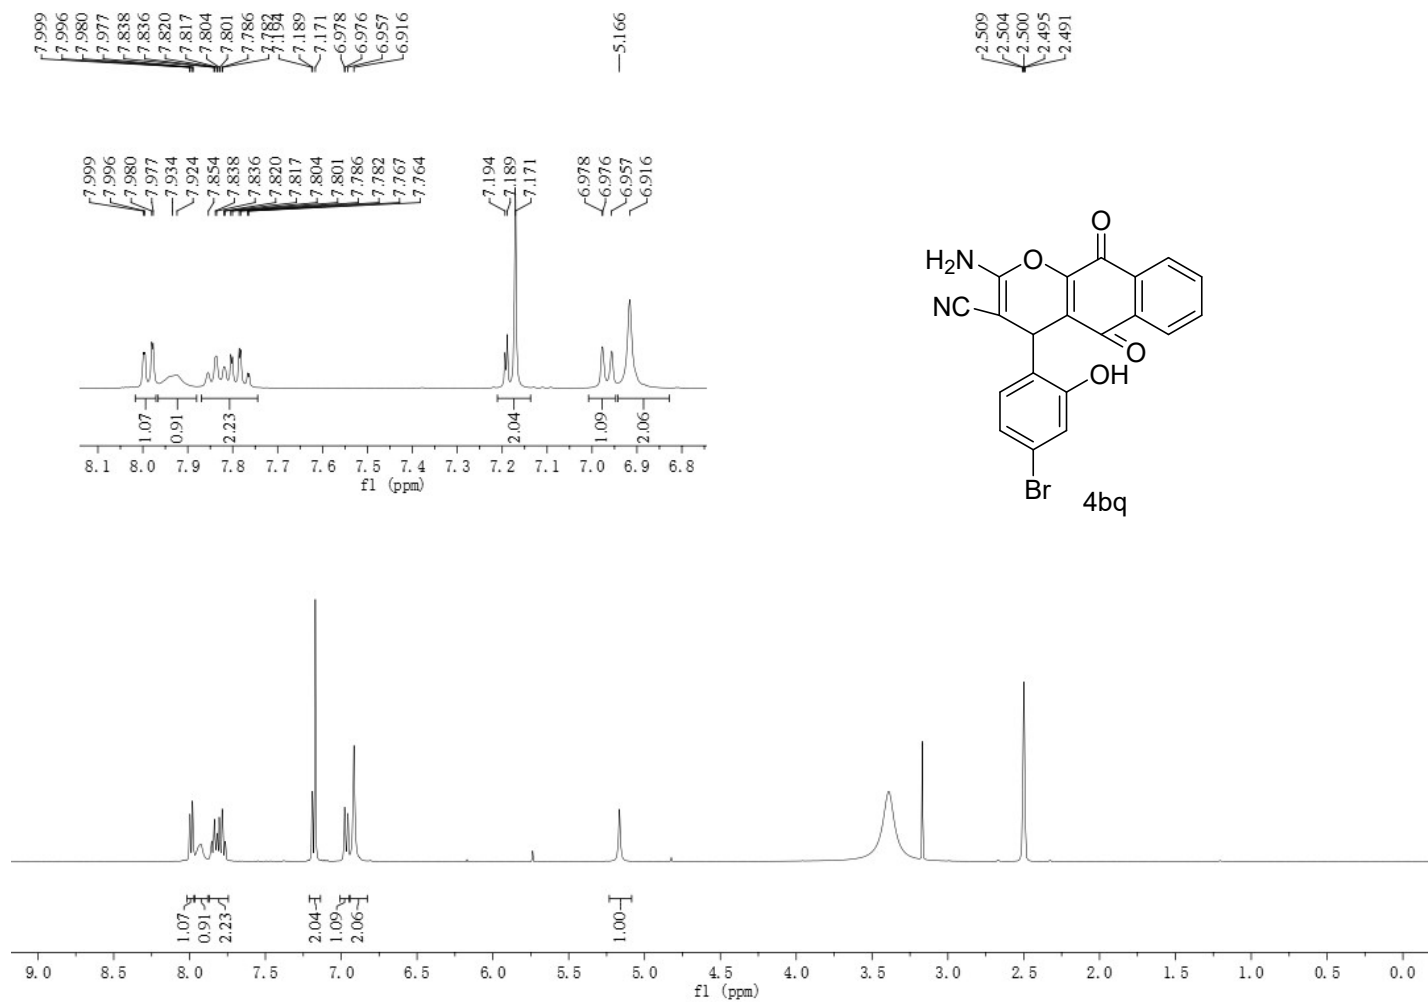

$^1\text{H}$  NMR of Compound **4bq** (400 MHz,  $\text{DMSO-}d_6$ )

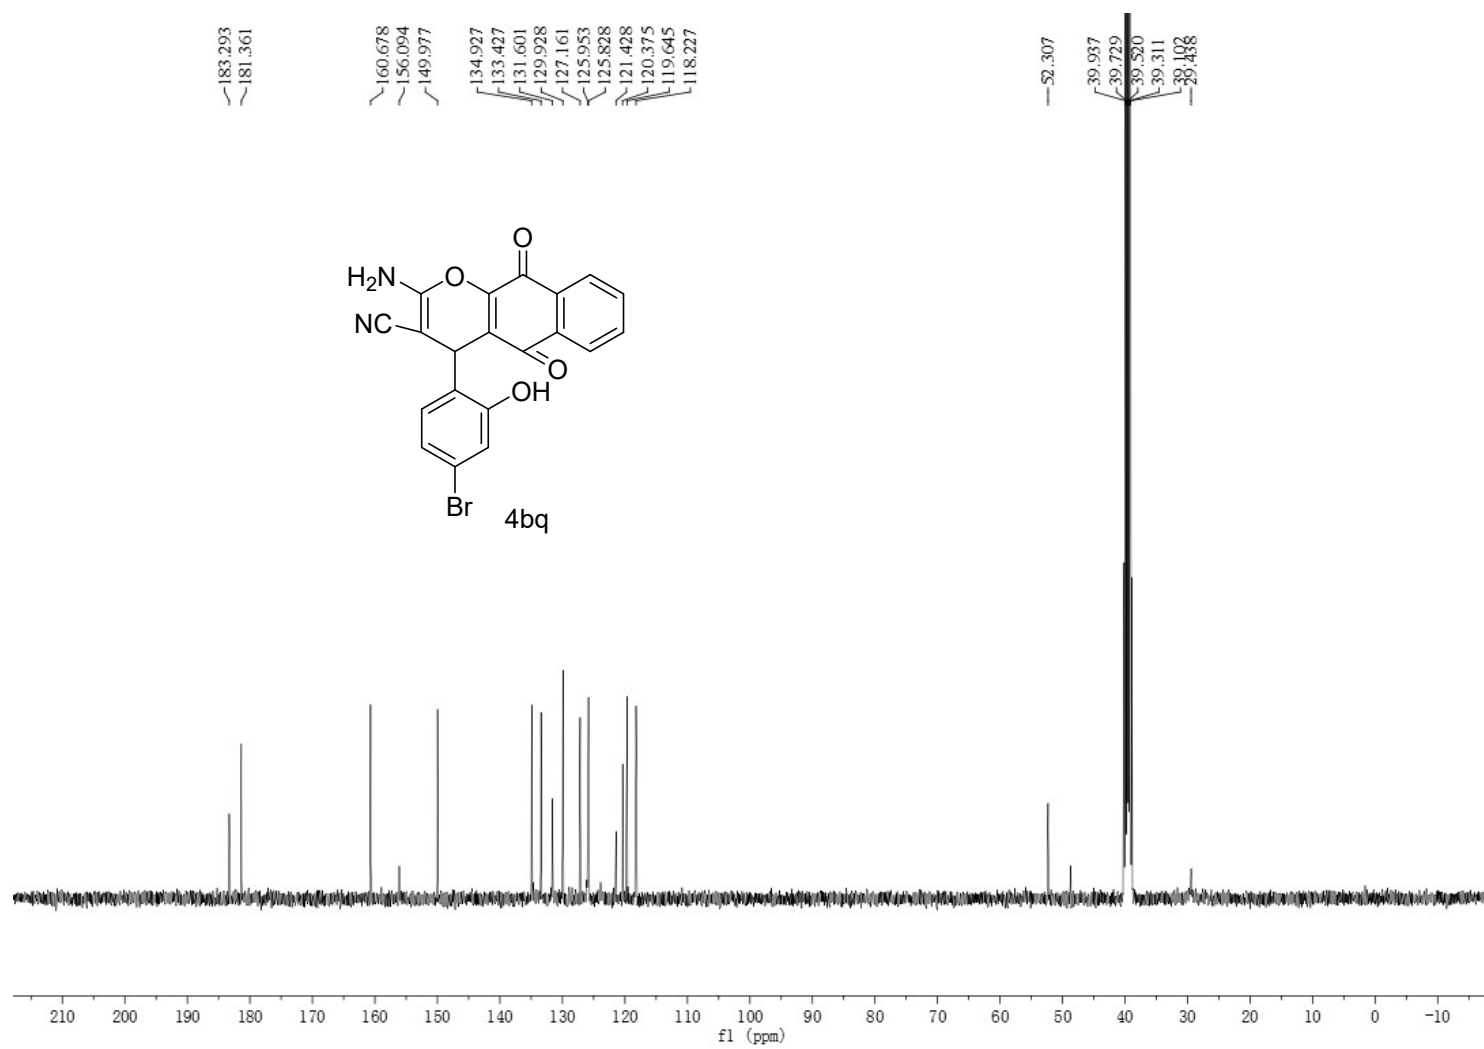

<sup>13</sup>C NMR of Compound **4bq** (101 MHz, DMSO-*d*<sub>6</sub>)

Item name: TAF-27  
Item description:

Channel name: 1: Average Time 0.1420 min : TOF MS (50-1500) ESI+ : Centroided : Combined

3.32e6

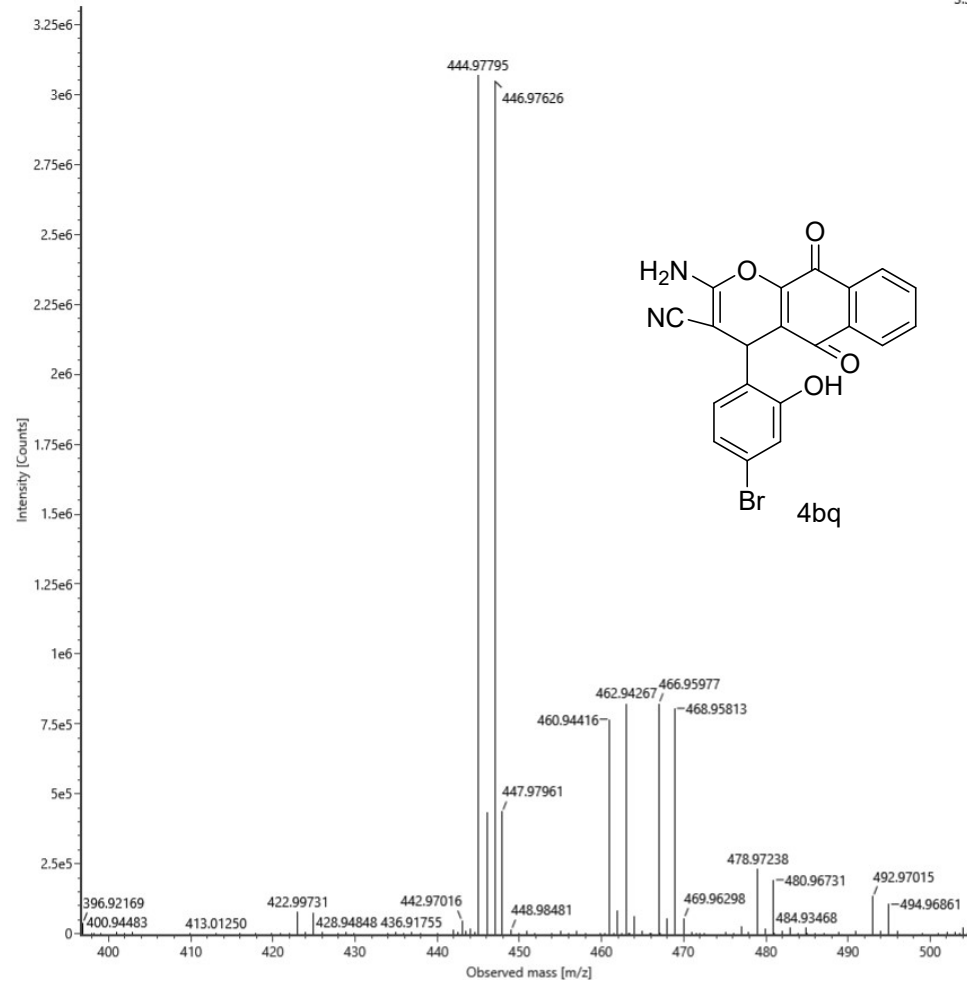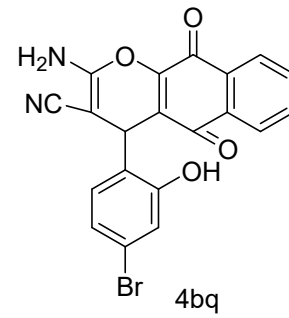

Supplement: d3nj05743g1.pdf [file d3nj05743g1.pdf]
